# Supplementary material for: NBS-induced intramolecular annulation reactions for the divergent synthesis of fused- and spirocyclic indolines
Source: Royal Society of Chemistry journal article supplement (doi:10.1039/d3cc01920a), 2023-01-01

# Supporting Information

## **NBS-induced intramolecular annulation reactions for the divergent synthesis of fused- and spirocyclic indolines**

Xian Luo<sup>a</sup>, Meng-Meng Xu<sup>a</sup>, Xiao-Ping Xu<sup>ab\*</sup> and Shun-Jun Ji<sup>ac\*</sup>

<sup>a</sup> Key Laboratory of Organic Synthesis of Jiangsu Province, College of Chemistry, Chemical Engineering and Materials Science & Collaborative Innovation Center of Suzhou Nano Science and Technology, Soochow University, Suzhou 215123, China. <sup>b</sup> Innovation Center for Chemical Science, Soochow University. <sup>c</sup> Suzhou Baolidi Functional Materials Research Institute, Suzhou, China, 215144.

\*E-mail: [xuxp@suda.edu.cn](mailto:xuxp@suda.edu.cn); [shunjun@suda.edu.cn](mailto:shunjun@suda.edu.cn).

|                                                                                                            |         |
|------------------------------------------------------------------------------------------------------------|---------|
| General methods and general procedure for synthesis of substrates                                          | S2-S4   |
| DFT computed energy surface for the formation of 4aa & 3aa                                                 | S4-S14  |
| Optimization of the Reaction Conditions                                                                    | S15-S18 |
| General procedure for intramolecular cyclization reaction of 3-indolepropionamide (3aa-am, 3ba-be, 4aa-am) | S18-S42 |
| X-Ray crystal structure of 3aa and 4aa                                                                     | S42-S43 |
| References                                                                                                 | S43     |
| Copies of NMR spectra                                                                                      | S44-S80 |

**General Methods.** Unless otherwise noted, all solvents were used directly without further purification. 3-indolepropionic acid were obtained from Bide Pharmatech, and used directly without further purification.  $^1\text{H}$  and  $^{13}\text{C}$  NMR spectra were recorded on a Bruker instrument (400 MHz and 100 MHz, respectively) and internally referenced to tetramethylsilane signal or residual protic solvent signals. Data for  $^1\text{H}$  NMR are recorded as follows: chemical shift ( $\delta$ , ppm), multiplicity (s = singlet, d = doublet, t = triplet, m = multiplet or unresolved, br = broad singlet, coupling constant (s) in Hz, integration). Data for  $^{13}\text{C}$  NMR and  $^{19}\text{F}$  NMR are reported in terms of chemical shift ( $\delta$ , ppm).

## General procedure for the synthesis of substrates<sup>1</sup>

### Procedure A

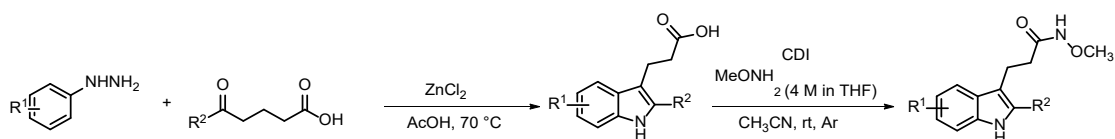

**Step 1:** To a stirring solution of 5-oxohexanoic acid (6.1 mmol, 1.0 equiv.) and phenylhydrazine (6.1 mmol, 1.0 equiv.) in AcOH (15 mL) was added zinc chloride (6.1 mmol, 1.0 equiv.) and the mixture was heated to 70 °C. After 16 h, the mixture was cooled to rt, diluted with EtOAc (100 mL), washed with water (50 mL), dried ( $\text{Na}_2\text{SO}_4$ ), and concentrated under reduced pressure, which was used without further purification.

**Preparation of MeONH<sub>2</sub> solution:** To a 100 mL round bottle charged with a stirring bar was added MeONH<sub>2</sub>·HCl (80.0 mmol) and 20 mL THF. Sodium hydroxide (powder, 1.0 equiv.) was then added and the reaction was stirred at room temperature for another 3 h until the system became clear which was ready to use for **Step 2** reaction.

**Step 2:** To a Schlenk tube charged with stirring bar was added 1*H*-indole-carboxylic acid (5.0 mmol, 1.0 equiv.) and 1,1'-carbonyldiimidazole (CDI, 5.0 mmol, 1.0 equiv.). Then 20 mL anhydrous acetonitrile was added to the reaction mixture under the protection of  $\text{N}_2$ . The system was stirred at room temperature for 12 h. Then, MeONH<sub>2</sub> solution (4 M in THF, 1.0 equiv.) was added and then stirred at room temperature for another 6 h (when most of indole was consumed by TLC detection). Upon completion, the resultant was extracted with EtOAc (30 mL), The combined organic phase

was extracted with sodium bicarbonate (2 × 50 mL), saturated salt water (2 × 50 mL). The combined organic phase was dried over MgSO<sub>4</sub>. The extract was concentrated under reduced pressure and the crude mixture was purified by silica gel column chromatography to obtain products (eluent: Petroleum ether/EtOAc = 3:1 ~ 1:1).

### Procedure B

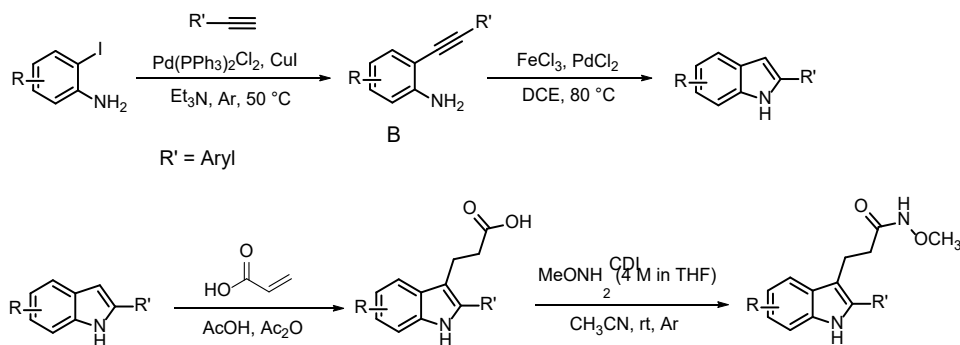

**Step 1:** Terminal alkynes (6 mmol, 1.2 equiv.) was added to a solution of 2-iodoaniline A (5 mmol, 1.0 equiv.), Pd(PPh<sub>3</sub>)<sub>2</sub>Cl<sub>2</sub> (0.125 mmol, 0.025 equiv.) and CuI (0.25 mmol, 0.05 equiv.). Then 5 mL Et<sub>3</sub>N was added to the reaction mixture under the protection of N<sub>2</sub>. The mixture was stirred at 50 °C overnight. The reaction was monitored by TLC. After reaction completed, the mixture was diluted with water and organic compound was extracted with CH<sub>2</sub>Cl<sub>2</sub>. The organic layer was dried over Na<sub>2</sub>SO<sub>4</sub>, and the solvent was evaporated. Purification by flash column chromatography (silica gel, ethyl acetate/ petroleum ether 1:10) yielded products B.

**Step 2:** A solution of B, FeCl<sub>3</sub>·6H<sub>2</sub>O (2 mol%) and PdCl<sub>2</sub> (1 mol%) was heated in DCE (1mL/0.15mmol) at 80 °C under the protection of N<sub>2</sub> for 4 h. After cooling to room temperature, the reaction mixture was diluted with water. The aqueous layers were extracted with DCM, and the combined organic phases were dried over Na<sub>2</sub>SO<sub>4</sub>. The solvent was evaporated under reduced pressure and the residue was purified by flash column chromatography (silica gel, ethyl acetate/petroleum ether 1:10).

**Step 3:** A solution of indole (3.0 mmol, 1 equiv.) was dissolved in acetic acid (1.6 M). Acrylic acid (7.2 mmol, 2.4 equiv.) and acetic acid anhydride (6.3 mmol, 2.1 equiv.) were added and the reaction mixture was heated to 95 °C for 24 hours. The reaction was then cooled to room temperature, which was then extracted with ethyl acetate and NaOH (4 N) solution. The aqueous layer was added the HCl (6 N) solution until the pH value was 2 and then extracted with ethyl acetate. The combined organics were dried and concentrated in vacuo. The residue was subjected to column

chromatography on silica gel and eluted with petroleum ether/ethyl acetate (4:1 and 2:1, v/v) to afford corresponding product.

**Step 4:** To a 100 mL round bottle charged with stirring bar was added 1*H*-indole-carboxylic acid (5.0 mmol, 1.0 equiv.) and 1,1'-carbonyldiimidazole (CDI, 5.0 mmol, 1.0 equiv.). Then 20 mL anhydrous acetonitrile was added to the reaction mixture under the protection of N<sub>2</sub> and it was stirred at room temperature for 12 h. Then, MeONH<sub>2</sub> solution (4 M in THF, 2.0 equiv.) was added and the reaction was stirred at room temperature for another 6 hours (when most of indole was consumed by TLC detection). Upon completion, the solvent was removed under reduced pressure and the residue was purified by silica gel column chromatography (petroleum ether/ethyl acetate 1:1) to products.

### DFT computed energy surface for the formation of 4aa & 3aa

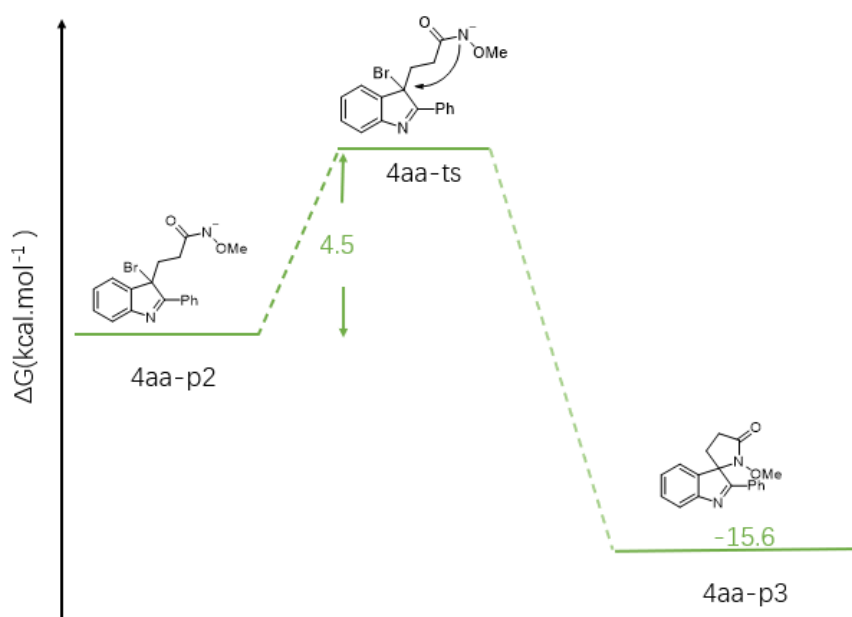

DFT computed energy surface for the formation of 4aa (R=Ph)

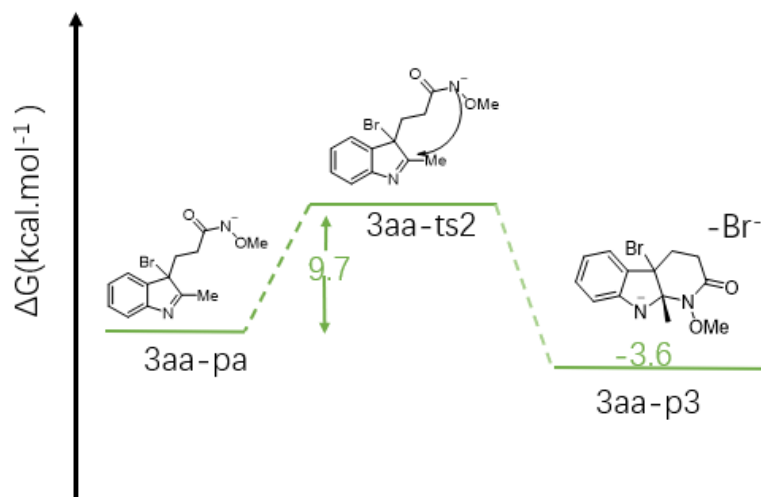

DFT computed energy surface for the formation of 3aa (R=Me)

The molecular geometry optimized using the Density Functional Theory (DFT) method of B3LYP with the basis set of 6-31+g(d,p). All calculations were performed using GAUSSIAN 2016 package<sup>[1]</sup>. All the optimized stationary points had been identified as minima (zero imaginary frequencies) and transition states (one imaginary frequency), via the vibrational analysis.

## References

M. J. Frisch, G. W. Trucks, H. B. Schlegel, G. E. Scuseria, M. A. Robb, J. R. Cheeseman, G. Scalmani, V. Barone, G. A. Petersson, H. Nakatsuji, X. Li, M. Caricato, A. V. Marenich, J. Bloino, B. G. Janesko, R. Gomperts, B. Mennucci, H. P. Hratchian, J. V. Ortiz, A. F. Izmaylov, J. L. Sonnenberg, D. Williams-Young, F. Ding, F. Lipparini, F. Egidi, J. Goings, B. Peng, A. Petrone, T. Henderson, D. Ranasinghe, V. G. Zakrzewski, J. Gao, N. Rega, G. Zheng, W. Liang, M. Hada, M. Ehara, K. Toyota, R. Fukuda, J. Hasegawa, M. Ishida, T. Nakajima, Y. Honda, O. Kitao, H. Nakai, T. Vreven, K. Throssell, J. A. Montgomery Jr., J. E. Peralta, F. Ogliaro, M. J. Bearpark, J. J. Heyd, E. N. Brothers, K. N. Kudin, V. N. Staroverov, T. A. Keith, R. Kobayashi, J. Normand, K. Raghavachari, A. P. Rendell, J. C. Burant, S. S. Iyengar,

J. Tomasi, M. Cossi, J. M. Millam, M. Klene, C. Adamo, R. Cammi, J. W. Ochterski, R. L. Martin, K. Morokuma, O. Farkas, J. B. Foresman, D. J. Fox, *Gaussian16*, Gaussian, Inc., Wallingford, CT, 2016.

### DFT details for mechanistic studies

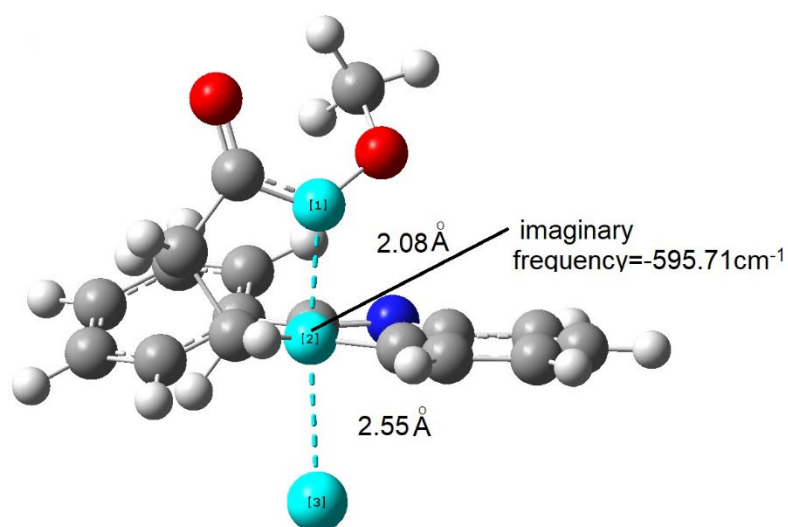

The bond lengths and only one imaginary frequency for 4aa-ts2

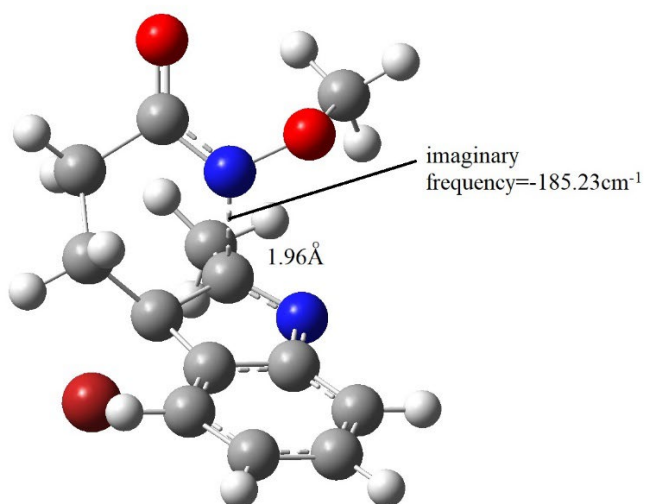

The bond lengths and only one imaginary frequency for 3aa-ts2

1. The free energy for the species in the calculation

| Species       | Free energy (a.u.) | Species               | Free energy (a.u.) |
|---------------|--------------------|-----------------------|--------------------|
| <b>4aa-p2</b> | -3527.0419         | <b>4aa-ts2</b>        | -3527.0348         |
| <b>4aa-p3</b> | -955.247401        | <b>Br<sup>-</sup></b> | -2571.81937        |
|               |                    |                       |                    |
| <b>3aa-p2</b> | -3335.343379       | <b>3aa-ts2</b>        | -3335.327906       |
| <b>3aa-p3</b> | -3335.349092       |                       |                    |

2. The coordination for the species.

4aa-p2

|    |             |             |             |
|----|-------------|-------------|-------------|
| C  | -3.28544400 | -3.24326600 | -0.68904800 |
| C  | -4.22488100 | -2.43747200 | -1.34652900 |
| C  | -4.02116800 | -1.05787900 | -1.47900200 |
| C  | -2.86115800 | -0.51761300 | -0.92761300 |
| C  | -1.92193000 | -1.32049600 | -0.26627000 |
| C  | -2.11427400 | -2.68948600 | -0.14911700 |
| N  | -2.46030700 | 0.83197700  | -0.96981900 |
| C  | -1.31507900 | 0.93930400  | -0.36090300 |
| C  | -0.78789700 | -0.42259300 | 0.15600000  |
| C  | 0.56782400  | -0.94957800 | -0.34189700 |
| C  | 1.87888300  | -0.26293200 | 0.03214200  |
| C  | 3.06343100  | -1.17987100 | -0.36568200 |
| N  | 4.00814300  | -0.47787000 | -0.98553100 |
| O  | 2.99943000  | -2.40235700 | -0.05321300 |
| Br | -0.83515100 | -0.37793900 | 2.18439800  |
| O  | 5.11593500  | -1.34131800 | -1.38429500 |
| C  | 5.96874000  | -1.58331600 | -0.28757200 |
| C  | -0.64861200 | 2.25470300  | -0.28474900 |
| C  | 0.36458000  | 2.55316900  | 0.64203000  |
| C  | 0.95176000  | 3.81924700  | 0.66911600  |

|   |             |             |             |
|---|-------------|-------------|-------------|
| C | 0.53883800  | 4.81081200  | -0.22201400 |
| C | -0.47618100 | 4.52883800  | -1.14392000 |
| C | -1.06266900 | 3.26688100  | -1.17529400 |
| H | -3.46037500 | -4.31207000 | -0.60383400 |
| H | -5.12039800 | -2.89057800 | -1.76360400 |
| H | -4.73313100 | -0.42239000 | -1.99679000 |
| H | -1.38643800 | -3.31578300 | 0.35817700  |
| H | 0.65801100  | -1.98899900 | -0.00752700 |
| H | 0.47709000  | -0.98592600 | -1.43811000 |
| H | 2.00106600  | 0.71010500  | -0.44729800 |
| H | 1.92215900  | -0.12821900 | 1.12106400  |
| H | 6.82404800  | -2.15490500 | -0.67481200 |
| H | 6.33718000  | -0.63733900 | 0.14687900  |
| H | 5.46648900  | -2.17065400 | 0.49399900  |
| H | 0.69512300  | 1.80156300  | 1.34478800  |
| H | 1.74274700  | 4.02266600  | 1.38505800  |
| H | 1.00657300  | 5.79161100  | -0.20479300 |
| H | -0.80134900 | 5.29076000  | -1.84745800 |
| H | -1.84485700 | 3.03796500  | -1.89024900 |

4aa-ts2

|   |             |             |             |
|---|-------------|-------------|-------------|
| C | 4.13410500  | 0.53362000  | -0.15612600 |
| C | 3.97010200  | 0.62076400  | -1.55953600 |
| C | 2.72363400  | 0.45410800  | -2.14994400 |
| C | 1.63471500  | 0.18379000  | -1.30912500 |
| C | 1.81476300  | 0.05316200  | 0.10163500  |
| C | 3.05834600  | 0.27432000  | 0.69020100  |
| N | 0.31777200  | 0.02754200  | -1.68445200 |
| C | -0.39467600 | -0.21541000 | -0.59692400 |
| C | 0.45065700  | -0.15228300 | 0.64120400  |



|    |             |             |             |
|----|-------------|-------------|-------------|
| C  | 0.04967700  | -0.17554000 | 2.10836900  |
| C  | -1.02219700 | 0.87723000  | 2.46070300  |
| C  | -0.82924300 | 2.15145600  | 1.66723600  |
| N  | 0.11140400  | 1.90530600  | 0.68837700  |
| O  | -1.37502900 | 3.22926400  | 1.89225500  |
| Br | 1.10662800  | -2.60585000 | 0.47504900  |
| O  | 0.40748700  | 2.80169200  | -0.26830200 |
| C  | -0.69601000 | 3.51650000  | -0.89559000 |
| C  | -1.83020700 | -0.51099200 | -0.68197000 |
| C  | -2.47227400 | -1.33684700 | 0.25810200  |
| C  | -3.83678600 | -1.60566600 | 0.14756700  |
| C  | -4.57884700 | -1.05932400 | -0.90238000 |
| C  | -3.94407400 | -0.25578700 | -1.85689300 |
| C  | -2.58217900 | 0.01347300  | -1.75104000 |
| H  | 5.12226700  | 0.68291100  | 0.26838200  |
| H  | 4.83723800  | 0.82717100  | -2.17934900 |
| H  | 2.57816800  | 0.53638900  | -3.22184400 |
| H  | 3.19864000  | 0.21584100  | 1.76465600  |
| H  | -0.29057100 | -1.16922500 | 2.39612800  |
| H  | 0.95811100  | 0.01850100  | 2.68704000  |
| H  | -2.02682900 | 0.50368000  | 2.23108400  |
| H  | -1.00795200 | 1.11469100  | 3.52812700  |
| H  | -1.49562200 | 2.81427800  | -1.14141800 |
| H  | -1.06211700 | 4.29599500  | -0.22809000 |
| H  | -0.25694800 | 3.93074000  | -1.80338100 |
| H  | -1.89643100 | -1.80716600 | 1.04624300  |
| H  | -4.31688700 | -2.25323800 | 0.87511200  |
| H  | -5.64153700 | -1.26738600 | -0.98485900 |
| H  | -4.51312500 | 0.16129600  | -2.68248400 |
| H  | -2.07933800 | 0.62323300  | -2.49409700 |

4aa-p3

|   |             |             |             |
|---|-------------|-------------|-------------|
| C | 4.13201100  | -0.99689000 | -0.24561600 |
| C | 3.84014400  | -2.31950500 | 0.10938000  |
| C | 2.51585600  | -2.74652000 | 0.27622700  |
| C | 1.50223400  | -1.81234200 | 0.07779700  |
| C | 1.78904500  | -0.48853400 | -0.28416800 |
| C | 3.09986500  | -0.06482300 | -0.44843300 |
| N | 0.11376200  | -2.03739000 | 0.21474400  |
| C | -0.50694300 | -0.92601100 | -0.02956800 |
| C | 0.45493300  | 0.21979300  | -0.45735500 |
| C | 0.18430300  | 0.71745400  | -1.92126000 |
| C | 0.45236100  | 2.23493600  | -1.89321700 |
| C | 0.29210700  | 2.63739800  | -0.43081000 |
| N | 0.32376100  | 1.46783700  | 0.28674300  |
| O | 0.18880800  | 3.76030300  | 0.03865300  |
| O | 0.14632500  | 1.43143800  | 1.65842400  |
| C | 1.31067000  | 1.90133200  | 2.37468100  |
| C | -1.97682500 | -0.84187000 | 0.01029300  |
| C | -2.66598600 | 0.38320200  | 0.08226700  |
| C | -4.06149000 | 0.41028200  | 0.12266100  |
| C | -4.79146400 | -0.77933500 | 0.08954500  |
| C | -4.11652200 | -2.00414400 | 0.02158800  |
| C | -2.72579400 | -2.03653700 | -0.01649800 |
| H | 5.16595400  | -0.68718200 | -0.36485300 |
| H | 4.65302200  | -3.02374800 | 0.26060800  |
| H | 2.27753500  | -3.76798900 | 0.55492700  |
| H | 3.33599700  | 0.96116900  | -0.71971300 |
| H | 0.81001800  | 0.17657000  | -2.63259000 |

|   |             |             |             |
|---|-------------|-------------|-------------|
| H | -0.86172900 | 0.52775000  | -2.17435800 |
| H | -0.24026200 | 2.80981600  | -2.51205800 |
| H | 1.46863600  | 2.49099400  | -2.21324200 |
| H | 1.03526100  | 1.80729500  | 3.42654400  |
| H | 2.17734300  | 1.27104500  | 2.15547500  |
| H | 1.50803600  | 2.94748400  | 2.12900800  |
| H | -2.12069600 | 1.31672800  | 0.14073300  |
| H | -4.57524400 | 1.36473400  | 0.18864700  |
| H | -5.87695700 | -0.75469000 | 0.11954400  |
| H | -4.67734500 | -2.93403100 | -0.00315700 |
| H | -2.19432100 | -2.98032900 | -0.06762600 |

3aa-p2

|    |             |             |             |
|----|-------------|-------------|-------------|
| C  | -3.35558100 | 2.37834100  | -0.96638000 |
| C  | -4.24090300 | 2.18053700  | 0.10094700  |
| C  | -3.97964100 | 1.21806900  | 1.08718800  |
| C  | -2.81543400 | 0.46491500  | 0.96944200  |
| C  | -1.93169700 | 0.65836500  | -0.10378200 |
| C  | -2.18693000 | 1.60931700  | -1.08061800 |
| N  | -2.35331200 | -0.53692400 | 1.86092400  |
| C  | -1.21235700 | -0.95980400 | 1.41670200  |
| C  | -0.76466400 | -0.26264300 | 0.12122700  |
| C  | 0.60241200  | 0.42412500  | 0.07156800  |
| C  | 1.87098700  | -0.39202500 | 0.32527900  |
| C  | 3.10621100  | 0.48254800  | 0.00119400  |
| N  | 3.99659400  | 0.41654800  | 0.98792500  |
| O  | 3.12143400  | 1.10412900  | -1.09839000 |
| Br | -0.86246700 | -1.71480200 | -1.29523700 |
| O  | 5.15092700  | 1.26359500  | 0.70356600  |

|   |             |             |             |
|---|-------------|-------------|-------------|
| C | 6.02937800  | 0.61283100  | -0.18770600 |
| H | -3.57656600 | 3.13339600  | -1.71566100 |
| H | -5.14000100 | 2.78737400  | 0.17000600  |
| H | -4.65334000 | 1.06497600  | 1.92493500  |
| H | -1.49961300 | 1.76120000  | -1.90771800 |
| H | 0.71401100  | 0.89496300  | -0.91143700 |
| H | 0.54678800  | 1.24475300  | 0.80302600  |
| H | 1.94546400  | -0.74678400 | 1.35553200  |
| H | 1.88460200  | -1.26122400 | -0.34470500 |
| H | 6.91366500  | 1.25845100  | -0.28451300 |
| H | 6.34392300  | -0.36851400 | 0.20894300  |
| H | 5.57257100  | 0.47520300  | -1.17770300 |
| C | -0.43176100 | -2.00450300 | 2.14679700  |
| H | 0.36338100  | -1.53837500 | 2.74003500  |
| H | -1.09901600 | -2.54481900 | 2.82246600  |
| H | 0.04849400  | -2.70211400 | 1.45558600  |

3aa-ts2

|   |             |             |             |
|---|-------------|-------------|-------------|
| C | 3.06538100  | 1.98501600  | 1.31527000  |
| C | 2.86522700  | 2.85022600  | 0.22516400  |
| C | 1.90677500  | 2.58583100  | -0.75595600 |
| C | 1.12166000  | 1.42362200  | -0.64462300 |
| C | 1.33948600  | 0.55011500  | 0.45405900  |
| C | 2.29490700  | 0.81810000  | 1.42481800  |
| N | 0.11621900  | 1.00752800  | -1.48902900 |
| C | -0.48196600 | -0.03855100 | -0.89318500 |
| C | 0.37065200  | -0.56740600 | 0.30653100  |
| C | -0.29898800 | -1.10088300 | 1.58521400  |
| C | -1.78771700 | -1.43810000 | 1.44442400  |

|    |             |             |             |
|----|-------------|-------------|-------------|
| C  | -2.62609500 | -0.22578800 | 1.01368200  |
| N  | -1.86533900 | 0.64311100  | 0.32113300  |
| O  | -3.82704700 | -0.12196800 | 1.33013800  |
| Br | 1.46927700  | -2.18212100 | -0.49801400 |
| O  | -2.45847600 | 1.86389000  | -0.02444600 |
| C  | -3.35157700 | 1.77271600  | -1.13504900 |
| H  | 3.81411500  | 2.21894900  | 2.06740200  |
| H  | 3.46609400  | 3.75486800  | 0.14976300  |
| H  | 1.74572900  | 3.26817900  | -1.58583800 |
| H  | 2.44903700  | 0.13696900  | 2.25949100  |
| H  | 0.25488800  | -1.96909800 | 1.95289700  |
| H  | -0.20384000 | -0.31504000 | 2.34235400  |
| H  | -1.94725200 | -2.26782500 | 0.74419400  |
| H  | -2.18731700 | -1.76682200 | 2.40960300  |
| H  | -3.83422700 | 2.75400500  | -1.19593900 |
| H  | -2.80279200 | 1.58457100  | -2.06457000 |
| H  | -4.11162800 | 1.00291300  | -0.96296000 |
| C  | -1.27647200 | -0.94985900 | -1.80508900 |
| H  | -1.99739300 | -1.58184300 | -1.28446200 |
| H  | -1.80570100 | -0.32940900 | -2.52968400 |
| H  | -0.58402000 | -1.59626500 | -2.35357900 |

3aa-p3

|   |             |             |             |
|---|-------------|-------------|-------------|
| C | -4.61080600 | 1.37194500  | 0.30301000  |
| C | -5.01394100 | 0.11874700  | -0.31255600 |
| C | -4.11447900 | -0.81555100 | -0.73038300 |
| C | -2.70066200 | -0.55360500 | -0.54602000 |
| C | -2.29769500 | 0.73438800  | 0.06271300  |

|    |             |             |             |
|----|-------------|-------------|-------------|
| C  | -3.29449400 | 1.67842500  | 0.48927500  |
| N  | -1.71195400 | -1.34675800 | -0.84163300 |
| C  | -0.48573300 | -0.56839300 | -0.54624400 |
| C  | -0.93632200 | 0.70807200  | 0.14148600  |
| C  | 0.05460400  | 1.50209600  | 0.89301900  |
| C  | 0.58270400  | 0.56981300  | 2.01067500  |
| C  | 0.86295700  | -0.87615100 | 1.59620900  |
| N  | 0.41861700  | -1.27913800 | 0.35876400  |
| O  | 1.49538300  | -1.62663000 | 2.33627400  |
| Br | 3.29549600  | 1.28306100  | -0.56308600 |
| O  | 0.84092400  | -2.51826200 | -0.11623500 |
| C  | 2.26984900  | -2.53929500 | -0.36475300 |
| H  | -5.38477400 | 2.06895300  | 0.61261200  |
| H  | -6.07833000 | -0.06656900 | -0.43881800 |
| H  | -4.42377400 | -1.74889800 | -1.19098700 |
| H  | -2.99635900 | 2.61958100  | 0.94416000  |
| H  | 0.91590000  | 1.77022200  | 0.25900200  |
| H  | -0.37631500 | 2.41351600  | 1.32162100  |
| H  | 1.53893200  | 0.94505400  | 2.38654500  |
| H  | -0.12289400 | 0.52773300  | 2.84960100  |
| H  | 2.40744600  | -3.30160000 | -1.13743700 |
| H  | 2.62293400  | -1.56290600 | -0.71036300 |
| H  | 2.79747000  | -2.81545000 | 0.55175100  |
| C  | 0.19623400  | -0.26458500 | -1.90374400 |
| H  | 1.11753900  | 0.30513100  | -1.74433200 |
| H  | 0.42131200  | -1.21611800 | -2.39046800 |
| H  | -0.49181100 | 0.29919200  | -2.54122200 |

## Optimization of the Reaction Conditions (fused-indoline)

**Table S1 Screening of solvent using NBS as catalyst<sup>a,b</sup>**

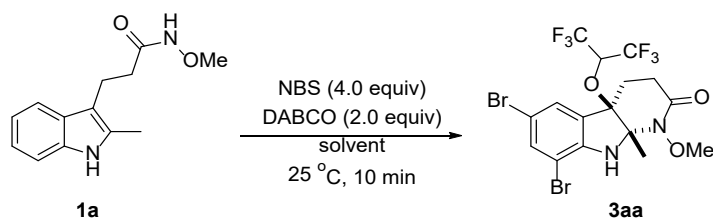

| Entry | Solvent          | Yield (%) |
|-------|------------------|-----------|
| 1     | HFIP             | 62        |
| 2     | DMF              | N.R.      |
| 3     | DMSO             | N.R.      |
| 4     | MeCN             | 14        |
| 5     | EA               | 18        |
| 6     | DCE              | 14        |
| 7     | H <sub>2</sub> O | Messy     |
| 8     | THF              | N.R.      |

<sup>a</sup>Reaction conditions: **1a** (0.1 mmol), DABCO (2.0 equiv), NBS (4.0 equiv), air, room temperature, 10 min.

<sup>b</sup>Yields are based on **1a**, determined by LC-MS.

**Table S2 Screening of base using HFIP as solvent<sup>a,b</sup>**

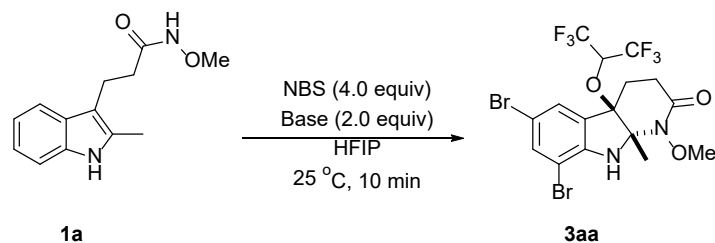

| Entry | Base                           | Yield           |
|-------|--------------------------------|-----------------|
| 1     | DABCO                          | 62 <sup>c</sup> |
| 2     | NaH                            | 72 <sup>c</sup> |
| 3     | K <sub>2</sub> CO <sub>3</sub> | 42              |

|   |                   |      |
|---|-------------------|------|
| 4 | Et <sub>3</sub> N | 10   |
| 5 | DMAP              | 42   |
| 6 | DBU               | N.R. |
| 7 | t-BuOK            | 45   |
| 8 | NaOAc             | N.R. |
| 9 | NaOH              | N.R. |

<sup>a</sup>Reaction conditions: **1a** (0.1 mmol), NBS (4.0 equiv), HFIP (1 mL), air, room temperature, 10 min. <sup>b</sup>Yields are based on **1a**, determined by LC-MS. <sup>c</sup>Isolated yield.

**Table S3 Screening of temperature<sup>a,b</sup>**

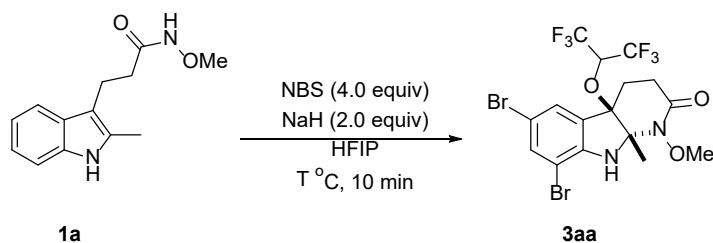

| Entry | T °C | Yield           |
|-------|------|-----------------|
| 1     | 0    | 53              |
| 2     | 25   | 72 <sup>c</sup> |
| 3     | 40   | 43              |
| 4     | 60   | 40              |

<sup>a</sup>Reaction conditions: **1a** (0.1 mmol), NBS (4.0 equiv), HFIP (1 mL), air, 10 min. <sup>b</sup>Yields are based on **1a**, determined by LC-MS. <sup>c</sup>Isolated yield.

## Optimization of the Reaction Conditions (Spiro-indolines)

**Table S4 Screening of solvent using NBS as catalyst<sup>a,b</sup>**



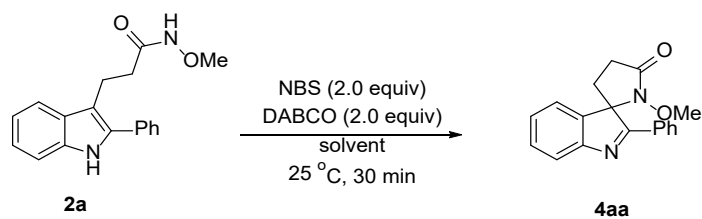

| Entry | Solvent          | Yield (%)       |
|-------|------------------|-----------------|
| 1     | HFIP             | 87 <sup>c</sup> |
| 2     | DMF              | 21              |
| 3     | DMSO             | 11              |
| 4     | MeCN             | 45              |
| 5     | EA               | 42              |
| 6     | DCE              | 50              |
| 7     | H <sub>2</sub> O | N.R.            |
| 8     | THF              | 35              |

<sup>a</sup>Reaction conditions: **2a** (0.1 mmol), DABCO (2.0 equiv), NBS (2.0 equiv), air, room temperature, 30 min.

<sup>b</sup>Yields are based on **2a**, determined by LC-MS. <sup>c</sup>Isolated yield.

**Table S5 Screening of base using HFIP as solvent<sup>a,b</sup>**

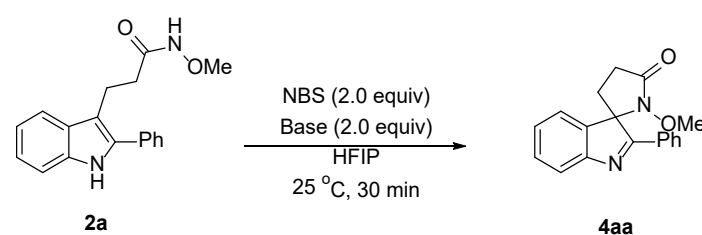

| Entry | Base                           | Yield           |
|-------|--------------------------------|-----------------|
| 1     | DABCO                          | 87 <sup>c</sup> |
| 2     | NaH                            | 77 <sup>c</sup> |
| 3     | K <sub>2</sub> CO <sub>3</sub> | 71              |
| 4     | Et <sub>3</sub> N              | 45              |
| 5     | DMAP                           | 42              |

|   |        |      |
|---|--------|------|
| 6 | DBU    | N.R. |
| 7 | t-BuOK | 45   |
| 8 | NaOAc  | N.R. |
| 9 | NaOH   | N.R. |

<sup>a</sup>Reaction conditions: **2a** (0.1 mmol), NBS (2.0 equiv), HFIP (1 mL), air, room temperature, 30 min. <sup>b</sup>Yields are based on **2a**, determined by LC-MS. <sup>c</sup>Isolated yield.

**Table S6 Screening of temperature<sup>a,b</sup>**

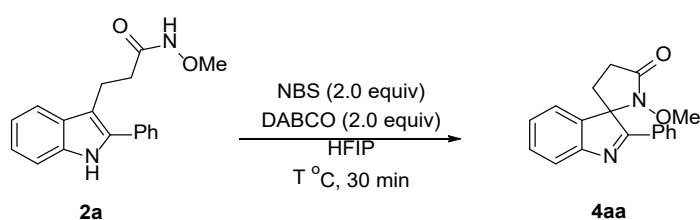

| Entry | T °C | Yield           |
|-------|------|-----------------|
| 1     | 0    | 76              |
| 2     | 25   | 87 <sup>c</sup> |
| 3     | 40   | 48              |
| 4     | 60   | 45              |

<sup>a</sup>Reaction conditions: **2a** (0.1 mmol), NBS (2.0 equiv), HFIP (1 mL), air, 30 min. <sup>b</sup>Yields are based on **2a**, determined by LC-MS. <sup>c</sup>Isolated yield.

### Spectral Characterization Data for the Reaction Substrates

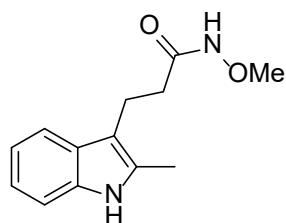

**1a. (Procedure A)** white solid. Analytical data for **1a**: m.p. = 129-130 °C. <sup>1</sup>H NMR (300 MHz, DMSO)  $\delta$  10.93 (s, 1H), 10.66 (s, 1H), 7.42 (d,  $J$  = 7.6 Hz, 1H), 7.24 (d,  $J$  = 7.7 Hz, 1H), 6.97 – 6.94 (m, 2H), 3.51 (s, 3H), 2.90 (t,  $J$  = 7.6 Hz, 2H), 2.32

(s, 3H), 2.22 (t,  $J = 7.6$  Hz, 2H).  $^{13}\text{C}$  NMR (75 MHz, DMSO)  $\delta$  169.4, 135.7, 132.2, 128.5, 120.4, 118.6, 117.9, 110.8, 109.5, 63.5, 34.3, 20.3, 11.7. IR (film): 3298, 2938, 1635, 1459, 1070, 743, 697, 421  $\text{cm}^{-1}$ . HRMS (ESI) calcd for  $\text{C}_{13}\text{H}_{17}\text{N}_2\text{O}_2^+$   $[\text{M}+\text{H}]^+$ : 255.1104, Found: 255.1097.

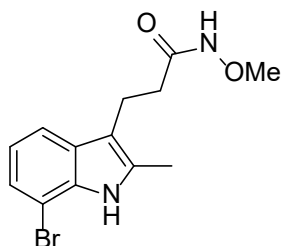

**1b. (Procedure A)** yellow solid. Analytical data for **1b**: m.p. = 154-155  $^{\circ}\text{C}$ .  $^1\text{H}$  NMR (300 MHz, DMSO)  $\delta$  10.90 (d,  $J = 9.7$  Hz, 2H), 7.43 (d,  $J = 7.8$  Hz, 1H), 7.19 (d,  $J = 7.6$  Hz, 1H), 6.88 (t,  $J = 7.7$  Hz, 1H), 3.51 (s, 3H), 2.89 (t,  $J = 7.4$  Hz, 2H), 2.37 (s, 3H), 2.21 (t,  $J = 7.4$  Hz, 2H).  $^{13}\text{C}$  NMR (75 MHz, DMSO)  $\delta$  169.1, 134.2, 134.0, 130.2, 122.9, 120.0, 117.4, 111.0, 103.8, 63.5, 34.1, 20.3, 11.6. IR (film): 3364, 3175, 2970, 1643, 1077, 574  $\text{cm}^{-1}$ . HRMS (ESI) calcd for  $\text{C}_{13}\text{H}_{15}\text{BrN}_2\text{NaO}_2^+$   $[\text{M}+\text{Na}]^+$ : 333.0209, Found: 333.0224.

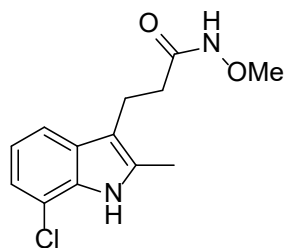

**1c. (Procedure A)** white solid. Analytical data for **1c**: m.p. = 147-148  $^{\circ}\text{C}$ .  $^1\text{H}$  NMR (300 MHz, DMSO)  $\delta$  11.02 (s, 1H), 10.93 (s, 1H), 7.41 (d,  $J = 7.7$  Hz, 1H), 7.06 (d,  $J = 7.5$  Hz, 1H), 6.94 (t,  $J = 7.7$  Hz, 1H), 3.52 (s, 3H), 2.91 (t,  $J = 7.4$  Hz, 2H), 2.37 (s, 3H), 2.22 (t,  $J = 7.4$  Hz, 2H).  $^{13}\text{C}$  NMR (75 MHz, DMSO)  $\delta$  169.2, 134.1, 132.4, 130.4, 119.9, 119.6, 117.0, 115.4, 110.9, 63.5, 34.1, 20.2, 11.6. IR (film): 3356, 2968, 1642, 1079, 935, 727, 576  $\text{cm}^{-1}$ . HRMS (ESI) calcd for  $\text{C}_{13}\text{H}_{15}\text{ClN}_2\text{NaO}_2^+$   $[\text{M}+\text{Na}]^+$ : 289.0714, Found: 289.0718.

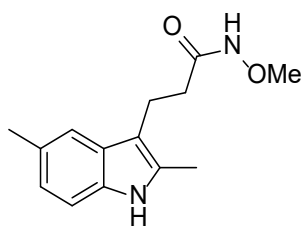

**1d. (Procedure A)** white solid. Analytical data for **1d**: m.p. = 130-131  $^{\circ}\text{C}$ .  $^1\text{H}$  NMR (300 MHz, DMSO)  $\delta$  10.92 (s, 1H), 10.51 (s, 1H), 7.19 (s, 1H), 7.11 (d,  $J = 8.1$  Hz, 1H), 6.79 – 6.73 (m, 1H), 3.52 (s, 3H), 2.86 (t,  $J = 7.5$  Hz, 2H), 2.35 (s, 3H), 2.29 (s, 3H), 2.20 (t,  $J = 7.5$  Hz, 2H).  $^{13}\text{C}$  NMR (75 MHz, DMSO)  $\delta$  169.4, 134.0, 132.2, 128.7, 126.8, 121.9, 117.6, 110.5, 109.0, 63.5, 34.3,

21.8, 20.3, 11.7. **IR (film)**: 3384, 3183, 2929, 1657, 1303, 793, 505  $\text{cm}^{-1}$ . **HRMS (ESI)** calcd for  $\text{C}_{14}\text{H}_{18}\text{N}_2\text{NaO}_2^+$   $[\text{M}+\text{Na}]^+$ : 269.1260, Found: 269.1267.

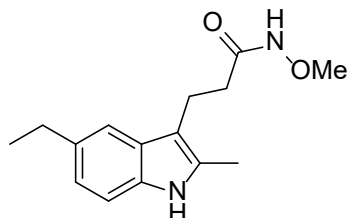

**1e. (Procedure A)** yellow solid. Analytical data for **1e**: m.p. = 141-142 °C.  **$^1\text{H}$  NMR (300 MHz, DMSO)**  $\delta$  10.95 (s, 1H), 10.54 (s, 1H), 7.24 (s, 1H), 7.15 (d,  $J$  = 8.2 Hz, 1H), 6.85 – 6.83 (m, 1H), 3.55 (s, 3H), 2.89 (t,  $J$  = 7.5 Hz, 2H), 2.67 (q,  $J$  = 7.6 Hz, 2H), 2.32 (s, 3H), 2.22 (t,  $J$  = 7.6 Hz, 2H), 1.24 (t,  $J$  = 7.6 Hz, 3H).  **$^{13}\text{C}$  NMR (75 MHz, DMSO)**  $\delta$  169.4, 134.20, 133.7, 132.2, 128.6, 120.7, 116.4, 110.6, 109.2, 63.5, 34.3, 29.1, 20.3, 17.2, 11.7. **IR (film)**: 3380, 2916, 2323, 1654, 803, 516  $\text{cm}^{-1}$ . **HRMS (ESI)** calcd for  $\text{C}_{15}\text{H}_{20}\text{N}_2\text{NaO}_2^+$   $[\text{M}+\text{Na}]^+$ : 283.1417, Found: 283.1414.

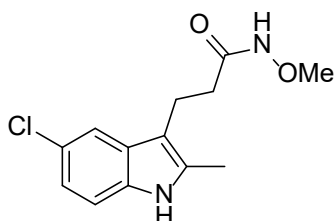

**1f. (Procedure A)** white solid. Analytical data for **1f**: m.p. = 144-145 °C.  **$^1\text{H}$  NMR (300 MHz, DMSO)**  $\delta$  10.92 (d,  $J$  = 4.8 Hz, 2H), 7.46 (d,  $J$  = 2.1 Hz, 1H), 7.24 (d,  $J$  = 8.5 Hz, 1H), 6.97 – 6.93 (m, 1H), 3.51 (s, 3H), 2.88 (t,  $J$  = 7.4 Hz, 2H), 2.33 (s, 3H), 2.20 (t,  $J$  = 7.4 Hz, 2H).  **$^{13}\text{C}$  NMR (75 MHz, DMSO)**  $\delta$  169.2, 134.4, 134.1, 129.7, 123.3, 120.1, 117.3, 112.2, 109.6, 63.5, 34.1, 20.1, 11.7. **IR (film)**: 3365, 3187, 2369, 1647, 1507, 785, 601  $\text{cm}^{-1}$ . **HRMS (ESI)** calcd for  $\text{C}_{13}\text{H}_{15}\text{ClN}_2\text{NaO}_2^+$   $[\text{M}+\text{Na}]^+$ : 289.0714, Found: 289.0714.

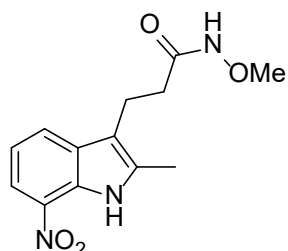

**1g. (Procedure A)** White solid. Analytical data for **1g**: m.p. = 77-78 °C.  **$^1\text{H}$  NMR (400 MHz, DMSO)**  $\delta$  10.91 (s, 1H), 10.50 (s, 1H), 7.11 (d,  $J$  = 8.6 Hz, 1H), 6.91 (d,  $J$  = 2.4 Hz, 1H), 6.62 – 6.60 (m, 1H), 3.75 (s, 3H), 3.52 (s, 3H), 2.84 (t,  $J$  = 7.4 Hz, 2H), 2.29 (s, 2H), 2.18 (t,  $J$  = 7.5 Hz, 2H).  **$^{13}\text{C}$  NMR (100 MHz, DMSO)**  $\delta$  169.3, 153.4, 133.0, 130.8, 128.8, 111.3, 109.8, 109.4, 100.5, 63.5, 34.1, 20.2, 11.8. **IR (film)**: 3297, 2950, 1619, 1215, 1026, 798, 623  $\text{cm}^{-1}$ . **HRMS (ESI)** calcd for  $\text{C}_{13}\text{H}_{15}\text{N}_3\text{NaO}_4^+$   $[\text{M}+\text{Na}]^+$ : 300.0955, Found: 300.0950.

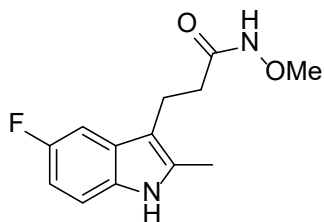

**1h. (Procedure A)** White solid. Analytical data for **1h**: m.p. = 137-138 °C.  $^1\text{H NMR}$  (400 MHz, DMSO)  $\delta$  10.92 (s, 1H), 10.80 (s, 1H), 7.23 – 7.16 (m, 2H), 6.83 – 6.78 (m, 1H), 3.51 (s, 3H), 2.86 (t,  $J = 7.4$  Hz, 2H), 2.33 (d,  $J = 4.3$  Hz, 3H), 2.20 (t,  $J = 7.4$  Hz, 2H).  $^{13}\text{C NMR}$  (100 MHz, DMSO)  $\delta$  169.3, 158.3, 156.0, 134.6, 132.2, 128.9, 128.8, 111.5, 111.4, 110.0, 109.9, 108.1, 107.9, 103.0, 102.7, 63.5, 34.0, 20.2, 11.7.  $^{19}\text{F NMR}$  (376 MHz, DMSO)  $\delta$  -126.01. **IR (film)**: 3290, 1625, 1487, 1071, 800, 624, 482  $\text{cm}^{-1}$ . **HRMS (ESI)** calcd for  $\text{C}_{13}\text{H}_{15}\text{FN}_2\text{NaO}_2^+$   $[\text{M}+\text{Na}]^+$ : 273.1010, Found: 273.1012.

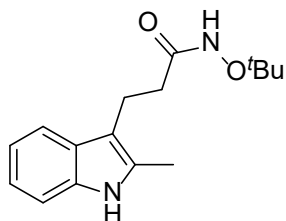

**1i. (Procedure A)** White solid. Analytical data for **1i**: m.p. = 84-85 °C.  $^1\text{H NMR}$  (400 MHz, DMSO)  $\delta$  10.92 (s, 1H), 10.80 (s, 1H), 7.21 – 7.18 (m, 2H), 6.82 – 6.78 (m, 1H), 3.51 (s, 3H), 2.86 (t,  $J = 7.4$  Hz, 2H), 2.33 (d,  $J = 4.3$  Hz, 3H), 2.20 (t,  $J = 7.4$  Hz, 2H).  $^{13}\text{C NMR}$  (100 MHz, DMSO)  $\delta$  169.3, 158.3, 156.0, 134.6, 132.2, 128.9, 128.8, 111.5, 111.4, 110.0, 109.9, 108.1, 107.9, 103.0, 102.7, 63.5, 34.0, 20.2, 11.7. **IR (film)**: 3388, 3206, 2976, 1650, 1461, 1366, 1182, 1066, 739  $\text{cm}^{-1}$ . **HRMS (ESI)** calcd for  $\text{C}_{16}\text{H}_{22}\text{N}_2\text{NaO}_2^+$   $[\text{M}+\text{Na}]^+$ : 297.1573, Found: 297.1584.

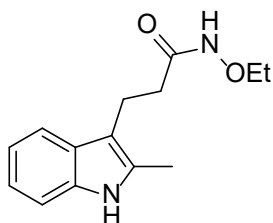

**1j. (Procedure A)** White solid. Analytical data for **1j**: m.p. = 134-135 °C.  $^1\text{H NMR}$  (400 MHz, DMSO)  $\delta$  10.78 (s, 1H), 10.67 (s, 1H), 7.42 (d,  $J = 7.7$  Hz, 1H), 7.23 (d,  $J = 7.8$  Hz, 1H), 6.97 – 6.95 (m, 2H), 3.72 (q,  $J = 7.0$  Hz, 2H), 2.89 (t,  $J = 7.5$  Hz, 2H), 2.32 (s, 3H), 2.22 (t,  $J = 7.5$  Hz, 2H), 1.06 (t,  $J = 7.0$  Hz, 3H).  $^{13}\text{C NMR}$  (100 MHz, DMSO)  $\delta$  169.3, 135.7, 132.2, 128.5, 120.3, 118.5, 117.9, 110.8, 109.5, 70.8, 34.2, 20.3, 13.8, 11.7. **IR (film)**: 3305, 3138, 2972, 1630, 1453, 1031, 736, 667  $\text{cm}^{-1}$ . **HRMS (ESI)** calcd for  $\text{C}_{14}\text{H}_{18}\text{N}_2\text{NaO}_2^+$   $[\text{M}+\text{Na}]^+$ : 269.1260, Found: 269.1266.

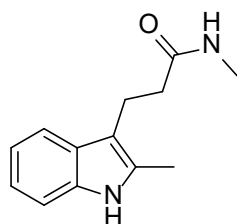

**1k. (Procedure A)** White solid. Analytical data for **1k**: m.p. = 134-135 °C.  $^1\text{H NMR}$  (400 MHz, DMSO)  $\delta$  10.71 (s, 1H), 7.18 (s, 1H), 7.45 (d,  $J = 7.1$  Hz, 1H), 7.21 (d,  $J = 7.6$  Hz, 1H), 6.98 (t,  $J = 7.6$  Hz, 1H), 6.92 (t,  $J = 7.6$  Hz, 1H), 3.10 – 2.96 (m, 2H), 2.46 – 2.40 (m, 2H) 2.66 (s, 3H), 2.31 (s, 3H).  $^{13}\text{C NMR}$  (100 MHz, DMSO)  $\delta$  171.8, 136.8, 132.1, 129.1, 123.4, 119.8, 118.6, 112.0, 108.7, 36.7, 26.2, 22.5, 12.1. **IR (film)**: 3310, 3130, 1651, 1453, 1038, 740, 661  $\text{cm}^{-1}$ . **HRMS (ESI)** calcd for  $\text{C}_{13}\text{H}_{16}\text{N}_2\text{NaO}^+$   $[\text{M}+\text{Na}]^+$ : 239.1155, Found: 239.1150.

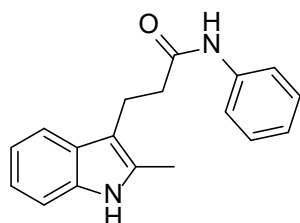

**1l. (Procedure A)** White solid. Analytical data for **1l**: m.p. = 134-135 °C.  $^1\text{H NMR}$  (400 MHz, DMSO)  $\delta$  10.69 (s, 1H), 9.86 (s, 1H), 7.61 (d,  $J = 7.1$  Hz, 2H), 7.50 (d,  $J = 7.6$  Hz, 1H), 7.33 – 7.23 (m, 3H), 7.05 – 6.92 (m, 3H), 3.06 – 2.93 (m, 2H), 2.66 – 2.55 (m, 2H), 2.36 (s, 3H).  $^{13}\text{C NMR}$  (100 MHz, DMSO)  $\delta$  171.5, 139.8, 135.7, 132.1, 129.1, 128.6, 123.4, 120.4, 119.6, 118.5, 118.0, 110.8, 109.7, 38.3, 20.4, 11.7. **IR (film)**: 3310, 3130, 1651, 1453, 1038, 740, 661  $\text{cm}^{-1}$ . **HRMS (ESI)** calcd for  $\text{C}_{18}\text{H}_{18}\text{N}_2\text{NaO}^+$   $[\text{M}+\text{Na}]^+$ : 301.1311, Found: 301.1311.

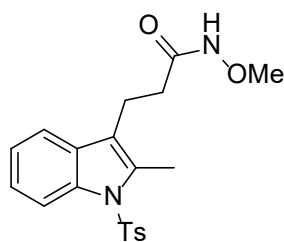

**1n. (Procedure A)** Yellow liquid. Analytical data for **1n**:  $^1\text{H NMR}$  (400 MHz,  $\text{CDCl}_3$ )  $\delta$  8.18 (d,  $J = 7.8$  Hz, 1H), 7.62 (d,  $J = 8.3$  Hz, 2H), 7.40 (d,  $J = 7.6$  Hz, 1H), 7.28 – 7.22 (m, 2H), 7.18 (d,  $J = 8.2$  Hz, 2H), 3.50 (s, 3H), 2.95 (m, 2H), 2.52 (s, 3H), 2.32 (s, 3H), 2.31 – 2.16 (m, 2H).  $^{13}\text{C NMR}$  (100 MHz, DMSO)  $\delta$  168.5, 145.5, 135.9, 135.7, 133.4, 130.6, 130.2, 126.6, 124.4, 123.8, 119.5, 119.2, 114.4, 63.4, 32.8, 21.4, 12.9. **HRMS (ESI)** calcd for  $\text{C}_{20}\text{H}_{22}\text{N}_2\text{NaO}_4\text{S}^+$   $[\text{M}+\text{Na}]^+$ : 409.1192, Found: 409.1192.

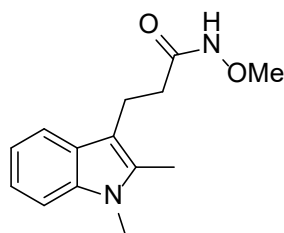

**1o. (Procedure A)** White solid. Analytical data for **1o**:  
 m.p. = 147-148 °C.  $^1\text{H NMR}$  (400 MHz, DMSO)  $\delta$  10.90 (s, 1H), 7.44 (d,  $J = 7.8$  Hz, 1H), 7.31 (d,  $J = 8.1$  Hz, 1H), 7.04 (ddd,  $J = 8.2, 6.9, 1.2$  Hz, 1H), 6.96 (td,  $J = 7.4, 6.9, 1.1$  Hz, 1H), 3.60 (s, 3H), 3.51 (s, 3H), 2.94 – 2.86 (m, 2H), 2.31 (s, 3H), 2.18 (t,  $J = 7.5$  Hz, 2H).  $^{13}\text{C NMR}$  (100 MHz, DMSO)  $\delta$  169.2, 136.7, 133.7, 127.5, 120.5, 118.7, 118.0, 109.5, 109.3, 63.5, 34.4, 29.7, 20.5, 10.3. **IR (film)**: 3144, 2936, 1641, 1471, 1331, 1076, 739, 559  $\text{cm}^{-1}$ . **HRMS (ESI)** calcd for  $\text{C}_{14}\text{H}_{18}\text{N}_2\text{NaO}_2^+$   $[\text{M}+\text{Na}]^+$ : 269.1260, Found: 269.1259.

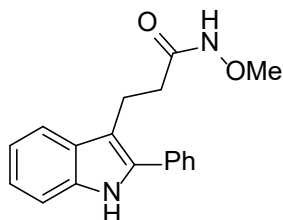

**2a. (Procedure B)** White solid. Analytical data for **2a**:  
 m.p. = 107-108 °C.  $^1\text{H NMR}$  (300 MHz, DMSO)  $\delta$  11.20 (s, 1H), 11.08 (s, 1H), 7.68 (d,  $J = 7.1$  Hz, 2H), 7.62 (d,  $J = 7.8$  Hz, 1H), 7.52 (t,  $J = 7.6$  Hz, 2H), 7.38 (t,  $J = 7.3$  Hz, 2H), 7.17 – 7.09 (m, 1H), 7.04 (t,  $J = 7.4$  Hz, 1H), 3.57 (s, 3H), 3.21 – 3.04 (m, 2H), 2.46 – 2.29 (m, 2H).  $^{13}\text{C NMR}$  (75 MHz, DMSO)  $\delta$  169.2, 136.5, 134.6, 133.3, 129.2, 128.9, 128.3, 127.8, 122.1, 119.2, 111.7, 111.1, 63.6, 34.4, 21.1. **IR (film)**: 3296, 2925, 2325, 1624, 736  $\text{cm}^{-1}$ . **HRMS (ESI)** calcd for  $\text{C}_{18}\text{H}_{18}\text{N}_2\text{NaO}_2^+$   $[\text{M}+\text{Na}]^+$ : 317.1260, Found: 317.1247.

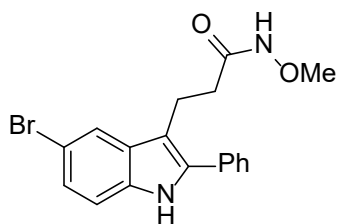

**2b. (Procedure B)** White solid. Analytical data for **2b**:  
 m.p. = 140-141 °C.  $^1\text{H NMR}$  (400 MHz, DMSO)  $\delta$  11.43 (s, 1H), 11.06 (s, 1H), 7.78 (s, 1H), 7.65 (d,  $J = 7.3$  Hz, 2H), 7.54 (t,  $J = 7.7$  Hz, 2H), 7.42 (t,  $J = 7.4$  Hz, 1H), 7.33 (d,  $J = 8.5$  Hz, 1H), 7.24 – 7.20 (m, 1H), 3.55 (s, 3H), 3.11 – 3.00 (m, 2H), 2.40 – 2.22 (m, 2H).  $^{13}\text{C NMR}$  (100 MHz, DMSO)  $\delta$  169.1, 136.2, 135.1, 132.7, 130.7, 129.3, 128.4, 128.3, 124.5, 121.5, 113.6, 111.8, 110.9, 63.6, 34.3, 20.8. **IR (film)**: 3361, 3215, 1636, 1456, 699  $\text{cm}^{-1}$ . **HRMS (ESI)** calcd for  $\text{C}_{18}\text{H}_{17}\text{BrN}_2\text{NaO}_2^+$   $[\text{M}+\text{Na}]^+$ : 395.0366, Found: 395.0362.

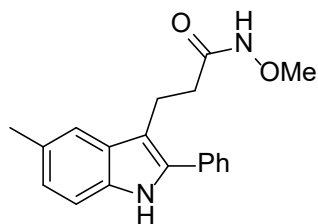

**2c. (Procedure B)** White solid. Analytical data for **2c**:  
 m.p. = 125-126 °C. **<sup>1</sup>H NMR (400 MHz, DMSO)** δ 11.07 (d, *J* = 8.6 Hz, 2H), 7.65 (d, *J* = 6.9 Hz, 2H), 7.52 (t, *J* = 7.8 Hz, 2H), 7.42 – 7.35 (m, 2H), 7.27 (d, *J* = 8.1 Hz, 1H), 6.97 – 6.94 (m, 1H), 3.58 (s, 3H), 3.14 – 3.03 (m, 2H), 2.42 (s, 3H), 2.40 – 2.28 (m, 2H). **<sup>13</sup>C NMR (100 MHz, DMSO)** δ 169.2, 134.9, 134.7, 133.4, 129.2, 129.1, 128.2, 127.7, 127.6, 123.7, 118.7, 111.4, 110.6, 63.6, 34.3, 21.8, 21.1. **IR (film)**: 3367, 3217, 1641, 1312, 699, 609 cm<sup>-1</sup>. **HRMS (ESI)** calcd for C<sub>19</sub>H<sub>20</sub>N<sub>2</sub>NaO<sub>2</sub><sup>+</sup> [M+Na]<sup>+</sup>: 331.1417, Found: 331.1404.

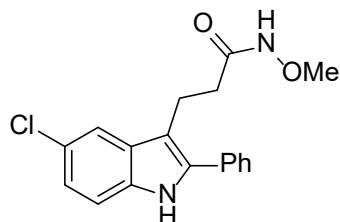

**2d. (Procedure B)** White solid. Analytical data for **2d**:  
 m.p. = 150-151 °C. **<sup>1</sup>H NMR (300 MHz, DMSO)** δ 11.42 (s, 1H), 11.06 (s, 1H), 7.66 (d, *J* = 6.7 Hz, 3H), 7.54 (t, *J* = 7.7 Hz, 2H), 7.42 – 7.39 (m, 2H), 7.13 – 7.10 (m, 1H), 3.55 (s, 3H), 3.07 (t, *J* = 7.8 Hz, 2H), 2.33 (t, *J* = 7.8 Hz, 2H). **<sup>13</sup>C NMR (75 MHz, DMSO)** δ 169.1, 136.4, 134.9, 132.8, 130.0, 129.3, 128.4, 128.2, 123.9, 121.9, 118.5, 113.1, 111.0, 63.6, 34.3, 20.8. **IR (film)**: 3358, 3209, 1636, 1072, 767, 699 cm<sup>-1</sup>. **HRMS (ESI)** calcd for C<sub>18</sub>H<sub>18</sub>ClN<sub>2</sub>O<sub>2</sub><sup>+</sup> [M+H]<sup>+</sup>: 329.1052, Found: 329.1068.

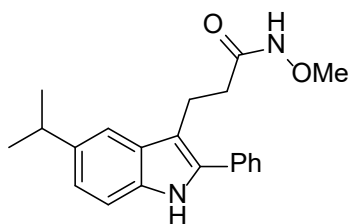

**2e. (Procedure B)** Yellow solid. Analytical data for **2e**:  
 m.p. = 97-98 °C. **<sup>1</sup>H NMR (300 MHz, DMSO)** δ 11.08 (d, *J* = 9.7 Hz, 2H), 7.66 (d, *J* = 7.0 Hz, 2H), 7.52 (t, *J* = 7.6 Hz, 2H), 7.41 (d, *J* = 15.3 Hz, 2H), 7.31 (d, *J* = 8.3 Hz, 1H), 7.05 – 7.03 (m, 1H), 3.59 (s, 3H), 3.14 – 3.08 (m, 2H), 2.98 (q, *J* = 6.9 Hz, 1H), 2.37 (t, *J* = 8.0 Hz, 2H), 1.30 (s, 3H), 1.28 (s, 3H). **<sup>13</sup>C NMR (75 MHz, DMSO)** δ 169.2, 139.3, 135.2, 134.7, 133.5, 129.2, 128.9, 128.2, 127.7, 121.0, 116.0, 111.5, 111.0, 63.6, 34.4, 34.3, 25.1, 21.0, 14.4. **IR (film)**: 3196, 2955, 1645, 1448, 1076, 765, 648 cm<sup>-1</sup>. **HRMS (ESI)** calcd for C<sub>21</sub>H<sub>24</sub>N<sub>2</sub>NaO<sub>2</sub><sup>+</sup> [M+Na]<sup>+</sup>: 359.1730, Found: 359.1726.



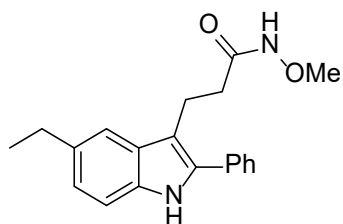

**2f. (Procedure B)** Light yellow solid. Analytical data for **2f**: m.p. = 118-119 °C. **<sup>1</sup>H NMR (300 MHz, DMSO)** δ 11.07 (d, *J* = 8.0 Hz, 2H), 7.66 (d, *J* = 6.9 Hz, 2H), 7.51 (t, *J* = 7.6 Hz, 2H), 7.44 – 7.35 (m, 2H), 7.30 (d, *J* = 8.3 Hz, 1H), 6.99 (d, *J* = 8.4 Hz, 1H), 3.58 (s, 3H), 3.11 (t, *J* = 8.0 Hz, 2H), 2.70 (q, *J* = 7.5 Hz, 2H), 2.37 (t, *J* = 8.0 Hz, 2H), 1.25 (t, *J* = 7.5 Hz, 3H). **<sup>13</sup>C NMR (75 MHz, DMSO)** δ 169.3, 135.1, 134.7, 134.5, 133.5, 129.2, 129.1, 128.2, 127.7, 122.6, 117.6, 111.5, 110.8, 63.6, 34.4, 29.1, 21.1, 17.2. **IR (film)**: 3190, 1640, 1447, 1076, 764, 567 cm<sup>-1</sup>. **HRMS (ESI)** calcd for C<sub>20</sub>H<sub>23</sub>N<sub>2</sub>O<sub>2</sub><sup>+</sup> [M+H]<sup>+</sup>: 323.1754, Found: 323.1753.

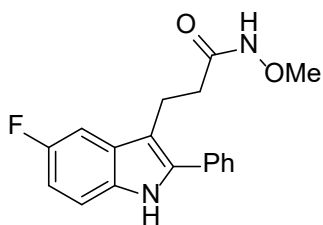

**2g. (Procedure B)** White solid. Analytical data for **2g**: m.p. = 113-114 °C. **<sup>1</sup>H NMR (300 MHz, DMSO)** δ 11.31 (s, 1H), 11.06 (s, 1H), 7.67 (d, *J* = 7.6 Hz, 2H), 7.54 (t, *J* = 7.6 Hz, 2H), 7.41 – 7.38 (m, 3H), 6.98 – 6.95 (m, 1H), 3.56 (s, 3H), 3.08 (t, *J* = 7.8 Hz, 2H), 2.35 (t, *J* = 7.8 Hz, 2H). **<sup>13</sup>C NMR (75 MHz, DMSO)** δ 169.1, 158.9, 155.8, 136.7, 133.1, 133.0, 129.3, 129.2, 129.1, 128.4, 128.1, 112.6, 112.5, 111.4, 111.3, 110.3, 109.9, 104.1, 103.8, 63.6, 34.2, 21.0. **<sup>19</sup>F NMR (376 MHz, DMSO)** δ -124.88. **IR (film)**: 3282, 2935, 1622, 1174, 767, 698, 563 cm<sup>-1</sup>. **HRMS (ESI)** calcd for C<sub>18</sub>H<sub>18</sub>FN<sub>2</sub>O<sub>2</sub><sup>+</sup> [M+H]<sup>+</sup>: 313.1347, Found: 313.1346.

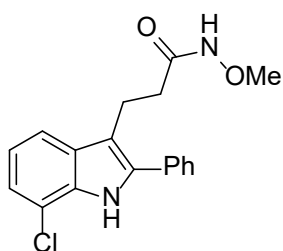

**2h. (Procedure B)** Yellow solid. Analytical data for **2h**: m.p. = 143-144 °C. **<sup>1</sup>H NMR (400 MHz, DMSO)** δ 11.41 (s, 1H), 11.05 (s, 1H), 7.68 (d, *J* = 7.1 Hz, 2H), 7.59 (d, *J* = 7.9 Hz, 1H), 7.54 (t, *J* = 7.7 Hz, 2H), 7.44 (t, *J* = 7.4 Hz, 1H), 7.19 (d, *J* = 7.3 Hz, 1H), 7.05 (t, *J* = 7.7 Hz, 1H), 3.55 (s, 3H), 3.11 – 3.01 (m, 2H), 2.43 – 2.24 (m, 2H). **<sup>13</sup>C NMR (100 MHz, DMSO)** δ 169.0, 136.7, 133.4, 132.5, 130.7, 129.3, 129.0, 128.3, 121.6, 120.3, 118.2, 116.2, 112.4, 63.6, 34.2, 20.9. **IR (film)**: 3284, 1629, 1071, 766, 734, 629 cm<sup>-1</sup>. **HRMS (ESI)** calcd for C<sub>18</sub>H<sub>18</sub>ClN<sub>2</sub>O<sub>2</sub><sup>+</sup> [M+H]<sup>+</sup>: 329.1052, Found: 329.1049.

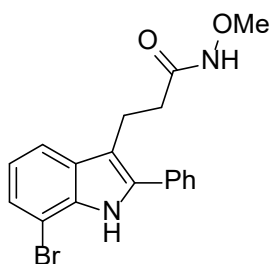

**2i. (Procedure B)** White solid. Analytical data for **2i**: m.p. = 121-122 °C. **<sup>1</sup>H NMR (400 MHz, DMSO)** δ 11.22 (s, 1H), 11.00 (s, 1H), 7.63 (d, *J* = 6.9 Hz, 2H), 7.59 (d, *J* = 7.9 Hz, 1H), 7.51 (t, *J* = 7.5 Hz, 2H), 7.44 – 7.39 (m, 1H), 7.31 (d, *J* = 7.6 Hz, 1H), 6.97 (t, *J* = 7.8 Hz, 1H), 3.51 (s, 3H), 3.03 – 2.98 (m, 2H), 2.31 – 2.27 (m, 2H). **<sup>13</sup>C NMR (100 MHz, DMSO)** δ 169.0, 136.7, 134.9, 132.4, 130.4, 129.4, 128.9, 124.7, 120.7, 118.7, 113.6, 112.5, 104.4, 63.6, 34.2, 20.9. **IR (film)**: 3285, 3200, 1650, 1630, 1067, 765, 743 cm<sup>-1</sup>. **HRMS (ESI)** calcd for C<sub>18</sub>H<sub>17</sub>BrN<sub>2</sub>NaO<sub>2</sub><sup>+</sup> [M+Na]<sup>+</sup>: 395.0366, Found: 395.0362.

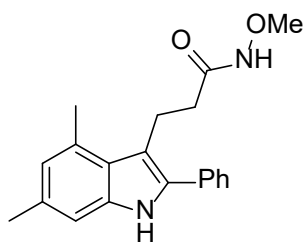

**2j. (Procedure B)** White solid. Analytical data for **2j**: m.p. = 67-68 °C. **<sup>1</sup>H NMR (400 MHz, DMSO)** δ 11.04 (s, 1H), 10.95 (s, 1H), 7.55 (d, *J* = 6.8 Hz, 2H), 7.47 (t, *J* = 7.7 Hz, 2H), 7.34 (t, *J* = 7.3 Hz, 1H), 6.95 (s, 1H), 6.56 (s, 1H), 3.55 (s, 3H), 3.13 – 3.03 (m, 2H), 2.60 (s, 3H), 2.31 (s, 3H), 2.29 – 2.22 (m, 2H). **<sup>13</sup>C NMR (100 MHz, DMSO)** δ 168.8, 137.4, 134.2, 133.6, 130.9, 129.7, 129.1, 128.6, 127.6, 124.9, 123.1, 111.8, 109.5, 63.7, 36.5, 21.7, 20.3, 14.6. **IR (film)**: 2933, 1646, 1443, 1072, 762, 697 cm<sup>-1</sup>. **HRMS (ESI)** calcd for C<sub>20</sub>H<sub>22</sub>N<sub>2</sub>NaO<sub>2</sub><sup>+</sup> [M+Na]<sup>+</sup>: 345.1573, Found: 345.1571.

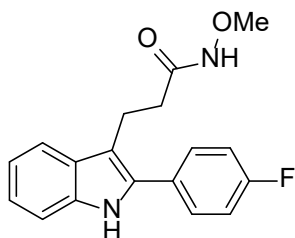

**2k. (Procedure B)** White solid. Analytical data for **2k**: m.p. = 111-112 °C. **<sup>1</sup>H NMR (400 MHz, DMSO)** δ 11.17 (s, 1H), 10.99 (s, 1H), 7.66 – 7.63 (m, 2H), 7.55 (d, *J* = 8.0 Hz, 1H), 7.36 – 7.30 (m, 3H), 7.08 (t, *J* = 7.5 Hz, 1H), 6.99 (t, *J* = 7.5 Hz, 1H), 3.51 (s, 3H), 3.03 – 3.00 (m, 2H), 2.38 – 2.22 (m, 2H). **<sup>13</sup>C NMR (100 MHz, DMSO)** δ 169.1, 163.2, 160.8, 136.4, 133.7, 130.4, 130.32, 129.8, 129.8, 128.8, 122.1, 119.2, 116.2, 116.0, 111.6, 111.0, 63.6, 34.2, 20.9. **<sup>19</sup>F NMR (376 MHz, DMSO)** δ -114.53. **IR (film)**: 3197, 1639, 1501, 1457, 1215, 841, 746, 563 cm<sup>-1</sup>. **HRMS (ESI)** calcd for C<sub>18</sub>H<sub>18</sub>FN<sub>2</sub>O<sub>2</sub><sup>+</sup> [M+H]<sup>+</sup>: 313.1347, Found: 313.1336.

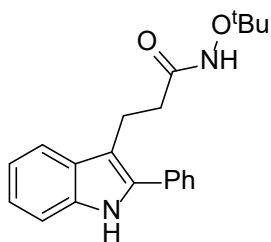

**2l. (Procedure B)** White solid. Analytical data for **2l**:  
 m.p. = 69-70 °C. **<sup>1</sup>H NMR (400 MHz, CDCl<sub>3</sub>)** δ 8.34 (s, 1H), 7.74 (s, 1H), 7.59 (d, *J* = 8.0 Hz, 1H), 7.53 (d, *J* = 7.3 Hz, 2H), 7.41 (t, *J* = 7.6 Hz, 2H), 7.32 (q, *J* = 7.7 Hz, 2H), 7.17 (t, *J* = 7.5 Hz, 1H), 7.11 (t, *J* = 7.4 Hz, 1H), 3.23 (t, *J* = 7.7 Hz, 2H), 2.45 (t, *J* = 7.7 Hz, 2H), 1.11 (d, *J* = 28.4 Hz, 9H). **<sup>13</sup>C NMR (100 MHz, CDCl<sub>3</sub>)** δ 171.6, 136.0, 132.9, 129.0, 128.0, 127.8, 122.3, 120.9, 119.7, 119.0, 116.0, 112.4, 111.1, 81.9, 34.2, 31.6, 27.0, 26.1. **IR (film)**: 2973, 1647, 1452, 1366, 1188, 741, 697 cm<sup>-1</sup>. **HRMS (ESI)** calcd for C<sub>21</sub>H<sub>24</sub>N<sub>2</sub>NaO<sub>2</sub><sup>+</sup> [M+Na]<sup>+</sup>: 359.1730, Found: 359.1739.

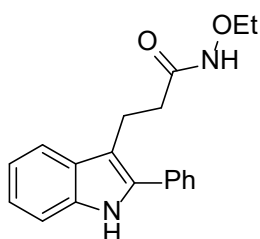

**2m. (Procedure B)** White solid. Analytical data for **2m**:  
 m.p. = 169-170 °C. **<sup>1</sup>H NMR (400 MHz, DMSO)** δ 11.17 (s, 1H), 10.91 (s, 1H), 7.66 – 7.60 (m, 2H), 7.59 (d, *J* = 7.8 Hz, 1H), 7.52 (t, *J* = 7.7 Hz, 2H), 7.41 – 7.34 (m, 2H), 7.11 (t, *J* = 7.5 Hz, 1H), 7.01 (t, *J* = 7.5 Hz, 1H), 3.75 (q, *J* = 7.0 Hz, 2H), 3.13 – 3.02 (m, 2H), 2.44 – 2.24 (m, 2H), 1.08 (t, *J* = 7.0 Hz, 3H). **<sup>13</sup>C NMR (100 MHz, DMSO)** δ 169.2, 136.5, 134.6, 133.3, 129.2, 128.8, 128.28, 127.8, 122.0, 119.1, 111.6, 111.1, 70.9, 34.3, 21.0, 13.9. **IR (film)**: 3195, 2932, 1631, 1450, 1308, 1967, 734, 570 cm<sup>-1</sup>. **HRMS (ESI)** calcd for C<sub>19</sub>H<sub>20</sub>N<sub>2</sub>NaO<sub>2</sub><sup>+</sup> [M+Na]<sup>+</sup>: 331.1417, Found: 331.1418.

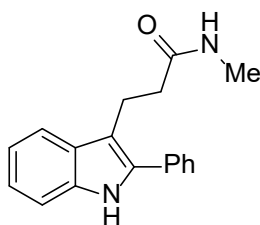

**2n. (Procedure A)** White solid. Analytical data for **2n**:  
 m.p. = 144-145 °C. **<sup>1</sup>H NMR (400 MHz, DMSO)** δ 11.22 (s, 1H), 7.90 (s, 1H), 7.71 (d, *J* = 7.7 Hz, 2H), 7.65 (d, *J* = 7.9 Hz, 1H), 7.54 (t, *J* = 7.6 Hz, 2H), 7.42 (t, *J* = 8.8 Hz, 2H), 7.15 (t, *J* = 7.6 Hz, 1H), 7.06 (t, *J* = 7.5 Hz, 1H), 3.16 (t, *J* = 7.9 Hz, 2H), 2.53 (t, *J* = 8.2 Hz, 2H). **<sup>13</sup>C NMR (100 MHz, DMSO)** δ 172.8, 136.6, 134.5, 133.5, 129.2, 129.0, 128.3, 127.8, 122.1, 119.3, 119.2, 111.7, 111.6, 37.4, 26.0, 21.5. **IR (film)**: 3255, 3057, 2929, 1705,

1615, 1450, 738, 433  $\text{cm}^{-1}$ . **HRMS (ESI)** calcd for  $\text{C}_{18}\text{H}_{18}\text{N}_2\text{NaO}^+$   $[\text{M}+\text{Na}]^+$ : 301.1311, Found: 301.1320.

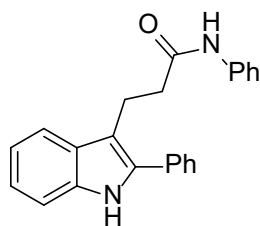

**2o. (Procedure A)** White solid. Analytical data for **2o**: m.p. = 151-152 °C.  **$^1\text{H}$  NMR (400 MHz, DMSO)**  $\delta$  11.23 (s, 1H), 10.00 (s, 1H), 7.76 – 7.69 (m, 3H), 7.67 (d,  $J$  = 7.4 Hz, 2H), 7.53 (t,  $J$  = 7.7 Hz, 2H), 7.45 – 7.37 (m, 2H), 7.35 – 7.28 (m, 2H), 7.15 (t,  $J$  = 7.0 Hz, 1H), 7.05 (q,  $J$  = 7.0 Hz, 2H), 3.32 – 3.20 (m, 2H), 2.84 – 2.71 (m, 2H).  **$^{13}\text{C}$  NMR (100 MHz, DMSO)**  $\delta$  171.4, 139.8, 136.6, 134.7, 133.5, 129.3, 129.2, 129.0, 128.4, 127.8, 123.5, 122.1, 119.7, 119.4, 119.2, 111.7, 111.4, 38.3, 21.2. **IR (film)**: 3417, 3251, 1649, 1599, 1548, 1441, 1345, 738, 686  $\text{cm}^{-1}$ . **HRMS (ESI)** calcd for  $\text{C}_{23}\text{H}_{20}\text{N}_2\text{NaO}^+$   $[\text{M}+\text{Na}]^+$ : 363.1468, Found: 363.1472.

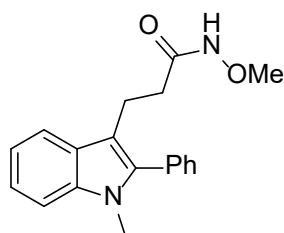

**2p. (Procedure A)** White solid. Analytical data for **2p**: m.p. = 130-131 °C.  **$^1\text{H}$  NMR (400 MHz,  $\text{CDCl}_3$ )**  $\delta$  7.64 (d,  $J$  = 7.9 Hz, 1H), 7.52 – 7.41 (m, 3H), 7.38 – 7.33 (m, 3H), 7.27 (dd,  $J$  = 7.0, 1.2 Hz, 1H), 7.15 (t,  $J$  = 7.4 Hz, 1H), 3.57 (s, 6H), 3.12 – 3.01 (m, 2H), 2.40 – 2.35 (m, 2H).  **$^{13}\text{C}$  NMR (100 MHz,  $\text{CDCl}_3$ )**  $\delta$  138.3, 137.2, 131.6, 130.6, 128.6, 128.5, 128.3, 127.2, 121.9, 119.5, 118.8, 109.5, 64.4, 34.5, 30.8, 20.6. **IR (film)**: 3130, 2928, 1647, 1467, 1357, 979, 746, 702, 592  $\text{cm}^{-1}$ . **HRMS (ESI)** calcd for  $\text{C}_{19}\text{H}_{20}\text{N}_2\text{NaO}_2^+$   $[\text{M}+\text{Na}]^+$ : 331.1417, Found: 331.1424.

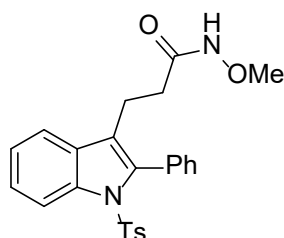

**2q. (Procedure A)** White solid. Analytical data for **2q**: m.p. = 161-162 °C.  **$^1\text{H}$  NMR (400 MHz,  $\text{CDCl}_3$ )**  $\delta$  8.32 (d,  $J$  = 8.3 Hz, 1H), 7.99 (s, 1H), 7.51 (d,  $J$  = 7.7 Hz, 1H), 7.45 – 7.34 (m, 4H), 7.32 – 7.28 (m, 4H), 7.07 (d,  $J$  = 8.2 Hz, 2H), 3.50 (s, 3H), 2.87 – 2.77 (m, 2H), 2.30 (s, 3H), 2.15 - 2.10 (m, 2H).  **$^{13}\text{C}$  NMR (100 MHz,  $\text{CDCl}_3$ )**  $\delta$  144.6, 137.2, 137.1, 135.3, 131.2, 131.0, 130.1, 129.34, 128.83, 127., 126.8, 125.1, 124.0, 121.9, 119.2, 116.0, 64.3, 33.0, 21.6, 20.0. **IR (film)**: 3342, 1703, 1442,

1357, 1172, 753, 664, 542  $\text{cm}^{-1}$ . **HRMS (ESI)** calcd for  $\text{C}_{25}\text{H}_{25}\text{N}_2\text{O}_4\text{S}^+$   $[\text{M}+\text{H}]^+$ : 449.1530, Found: 449.1531.

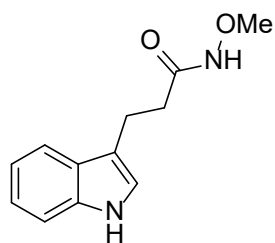

**5. (Procedure A)** White solid. Analytical data for **5**: m.p. = 129-130  $^{\circ}\text{C}$ .  **$^1\text{H}$  NMR (400 MHz, DMSO)**  $\delta$  10.94 (s, 1H), 10.73 (s, 1H), 7.47 (d,  $J = 7.8$  Hz, 1H), 7.29 (d,  $J = 8.2$  Hz, 1H), 7.03 (dd,  $J = 15.1, 8.1$  Hz, 2H), 6.93 (t,  $J = 7.5$  Hz, 1H), 3.50 (s, 3H), 2.88 (t,  $J = 7.6$  Hz, 2H), 2.27 (t,  $J = 7.6$  Hz, 2H).  **$^{13}\text{C}$  NMR (100 MHz, DMSO)**  $\delta$  169.3, 136.7, 127.4, 122.7, 121.4, 118.8, 118.7, 113.9, 111.8, 63.6, 33.8, 21.1. **IR (film)**: 3403, 3110, 2928, 2888, 1651, 1088, 1056, 1002, 740, 492  $\text{cm}^{-1}$ . **HRMS (ESI)** calcd for  $\text{C}_{15}\text{H}_{20}\text{N}_2\text{NaO}_2^+$   $[\text{M}+\text{Na}]^+$ : 283.1417, Found: 283.1424.

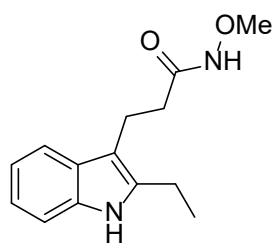

**6. (Procedure B)** White solid. Analytical data for **6**: m.p. = 84-54  $^{\circ}\text{C}$ .  **$^1\text{H}$  NMR (400 MHz,  $\text{CDCl}_3$ )**  $\delta$  8.42 (s, 1H), 8.09 (s, 1H), 7.51 (d,  $J = 7.7$  Hz, 1H), 7.30 (d,  $J = 7.9$  Hz, 1H), 7.12 (dt,  $J = 19.9, 6.8$  Hz, 2H), 3.57 (s, 3H), 3.08 (t,  $J = 7.4$  Hz, 2H), 2.75 (d,  $J = 7.6$  Hz, 2H), 2.39 (t,  $J = 7.3$  Hz, 2H), 1.26 (t,  $J = 7.6$  Hz, 3H).  **$^{13}\text{C}$  NMR (100 MHz,  $\text{CDCl}_3$ )**  $\delta$  170.9, 137.8, 135.4, 128.1, 121.1, 119.2, 117.9, 110.6, 108.8, 64.1, 34.3, 20.1, 19.2, 14.3. **IR (film)**: 3387, 2975, 1709, 1654, 1461, 749  $\text{cm}^{-1}$ . **HRMS (ESI)** calcd for  $\text{C}_{14}\text{H}_{18}\text{N}_2\text{NaO}_2^+$   $[\text{M}+\text{Na}]^+$ : 269.1260, Found: 269.1257.

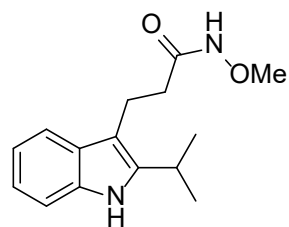

**7. (Procedure B)** White solid. Analytical data for **7**: m.p. = 65-66  $^{\circ}\text{C}$ .  **$^1\text{H}$  NMR (400 MHz,  $\text{CDCl}_3$ )**  $\delta$  8.23 (s, 1H), 8.03 (s, 1H), 7.52 (d,  $J = 7.7$  Hz, 1H), 7.33 (d,  $J = 7.5$  Hz, 1H), 7.18 – 7.14 (m, 1H), 7.12 – 7.09 (m, 1H), 3.61 (s, 3H), 3.34 – 3.27 (m, 1H), 3.11 (t,  $J = 7.4$  Hz, 2H), 2.43 (d,  $J = 7.6$  Hz, 2H), 1.32 (d,  $J = 7.1$  Hz, 6H).  **$^{13}\text{C}$  NMR (100 MHz,  $\text{CDCl}_3$ )**  $\delta$  170.90, 141.61, 135.28, 128.01, 121.14, 119.26, 117.98, 110.66, 107.93, 64.29, 34.41, 25.34, 22.81, 20.00. **IR (film)**: 3321, 2957, 1645, 459, 1073, 742  $\text{cm}^{-1}$ . **HRMS (ESI)** calcd for  $\text{C}_{16}\text{H}_{23}\text{N}_2\text{O}_2^+$   $[\text{M}+\text{H}]^+$ : 297.1573, Found: 297.1576.

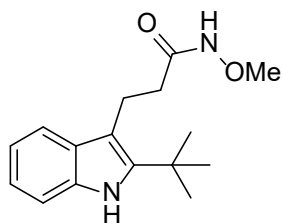

**8. (Procedure B)** White solid. Analytical data for **8**:

m.p. = 65-66 °C.  $^1\text{H NMR}$  (400 MHz, DMSO)  $\delta$  11.03 (s, 1H), 10.40 (s, 1H), 7.42 (d,  $J = 7.8$  Hz, 1H), 7.29 (d,  $J = 7.9$  Hz, 1H), 7.04 – 6.97 (m, 1H), 6.94 – 6.91 (m, 1H), 3.58 (s, 3H), 3.12 – 2.98 (m, 2H), 2.34 – 2.06 (m, 2H), 1.43 (s, 9H)

$^{13}\text{C NMR}$  (100 MHz, DMSO)  $\delta$  174.0, 147.4, 139.7, 134.0, 125.4, 123.3, 122.6, 115.9, 112.9, 68.4, 39.9, 38.2, 35.8, 26.2. **IR (film)**: 3321, 2957, 1645, 459, 1073, 742  $\text{cm}^{-1}$ .

**HRMS (ESI)** calcd for  $\text{C}_{16}\text{H}_{23}\text{N}_2\text{O}_2^+ [\text{M}+\text{H}]^+$ : 297.1573, Found: 297.1576.

### Spectral Characterization Data for the product Substrates

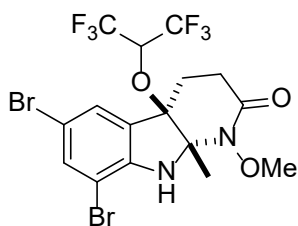

**3aa.** Yellow solid (41.5 mg, 72% yield). Analytical data

for **3aa**: m.p. = 164-165 °C.  $^1\text{H NMR}$  (400 MHz, DMSO)  $\delta$  7.92 (s, 1H), 7.64 (s, 1H), 7.49 (s, 1H), 5.54 – 5.48 (m, 1H), 3.65 (s, 3H), 2.62 (s, 1H), 2.40 (d,  $J = 12.8$  Hz, 1H), 2.10 (s,

2H), 1.66 (s, 3H).  $^{13}\text{C NMR}$  (100 MHz,  $\text{CDCl}_3$ )  $\delta$  164.9, 148.2, 137.4, 127.1, 123.9, 122.6, 122.1, 119.8, 119.3, 111.3, 105.9, 89.7, 88.0, 70.8, 70.5, 70.1, 69.8, 69.5, 64.4, 28.7, 24.2, 18.0.  $^{19}\text{F NMR}$  (376 MHz, DMSO)  $\delta$  -72.81 (q,  $J = 9.6$  Hz), -73.37 (q,  $J = 9.6$  Hz). **IR (film)**: 3421, 2951, 1664, 1286, 1184, 876, 684  $\text{cm}^{-1}$ . **HRMS (ESI)** calcd for  $\text{C}_{16}\text{H}_{14}\text{Br}_2\text{F}_6\text{N}_2\text{NaO}_3^+ [\text{M}+\text{Na}]^+$ : 576.9168, Found: 576.9149.

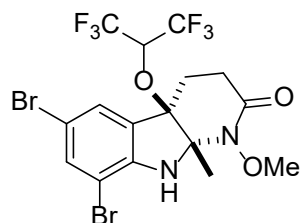

**3ab.** white solid (43.8 mg, 72% yield). Analytical data

for **3ab**: m.p. = 164-165 °C.  $^1\text{H NMR}$  (400 MHz, DMSO)  $\delta$  7.92 (d,  $J = 1.8$  Hz, 1H), 7.65 (d,  $J = 1.8$  Hz, 1H), 7.49 (s, 1H), 5.54 – 5.47 (m, 1H), 3.65 (s, 3H), 2.69 – 2.57 (m, 1H), 2.47 –

2.33 (m, 1H), 2.15 – 2.04 (m, 2H), 1.66 (s, 3H).  $^{13}\text{C NMR}$  (100 MHz, DMSO)  $\delta$  164.2, 148.0, 136.2, 127.8, 127.5, 123.4, 123.0, 120.5, 120.2, 109.1, 103.3, 89.1, 87.2, 69.5, 69.2, 68.9, 68.6, 68.2, 64.0, 28.5, 21.8, 17.3.  $^{19}\text{F NMR}$  (376 MHz, DMSO)  $\delta$  -72.81 (q,  $J = 9.9$  Hz), -72.94 (q,  $J = 9.8$  Hz). **IR (film)**: 3421, 2951, 1664, 1286, 1184, 876, 684

cm<sup>-1</sup>. **HRMS (ESI)** calcd for C<sub>16</sub>H<sub>14</sub>Br<sub>2</sub>F<sub>6</sub>N<sub>2</sub>NaO<sub>3</sub><sup>+</sup> [M+Na]<sup>+</sup>: 576.9168, Found: 576.9149.

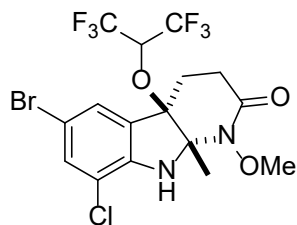

**3ac.** Yellow solid (25.5 mg, 50% yield). Analytical data for **3ac**: m.p. = 165-166 °C. **<sup>1</sup>H NMR (400 MHz, DMSO)** δ 7.89 (d, *J* = 1.9 Hz, 1H), 7.68 (s, 1H), 7.55 (d, *J* = 1.8 Hz, 1H), 5.55 – 5.49 (m, 1H), 3.65 (s, 3H), 2.70 – 2.58 (m, 1H), 2.48 – 2.35 (m, 1H), 2.20 – 2.02 (m, 2H), 1.67 (s, 3H). **<sup>13</sup>C NMR (100 MHz, DMSO)** δ 164.3, 146.5, 133.6, 127.7, 127.4, 123.4, 123.0, 115.2, 108.8, 89.3, 87.1, 69.2, 68.9, 68.6, 64.0, 28.5, 21.8, 17.4. **<sup>19</sup>F NMR (376 MHz, DMSO)** δ -72.71 (q, *J* = 9.8 Hz), -72.90 (q, *J* = 9.8 Hz). **IR (film)**: 1663, 1287, 1184, 876, 685, 470 cm<sup>-1</sup>. **HRMS (ESI)** calcd for C<sub>16</sub>H<sub>14</sub>BrClF<sub>6</sub>N<sub>2</sub>NaO<sub>3</sub><sup>+</sup> [M+Na]<sup>+</sup>: 532.9673, Found: 532.9650.

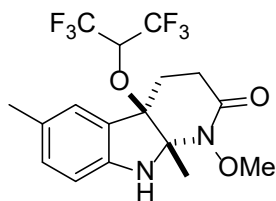

**3ad.** Yellow solid (24.3 mg, 59% yield). Analytical data for **3ad**: m.p. = 144-145 °C. **<sup>1</sup>H NMR (400 MHz, DMSO)** δ 7.41 (s, 1H), 7.03 (d, *J* = 8.2 Hz, 1H), 6.92 (s, 1H), 6.60 (d, *J* = 7.9 Hz, 1H), 5.16 (s, 1H), 3.66 (s, 3H), 2.59 – 2.55 (m, 1H), 2.43 – 2.32 (m, 1H), 2.24 (s, 3H), 2.07 (s, 2H), 1.63 (s, 3H). **<sup>13</sup>C NMR (100 MHz, DMSO)** δ 164.6, 148.6, 132.6, 127.0, 126.2, 123.0, 110.4, 89.9, 87.4, 69.6, 69.3, 69.0, 68.7, 68.4, 63.8, 29.1, 22.5, 20.9, 18.2. **<sup>19</sup>F NMR (376 MHz, DMSO)** δ -72.29 (q, *J* = 9.8 Hz), -72.77 (q, *J* = 9.9 Hz). **IR (film)**: 3648, 2356, 1651, 1280, 1186, 1098, 884, 685 cm<sup>-1</sup>. **HRMS (ESI)** calcd for C<sub>17</sub>H<sub>18</sub>F<sub>6</sub>N<sub>2</sub>NaO<sub>3</sub><sup>+</sup> [M+Na]<sup>+</sup>: 435.1114, Found: 435.1106.

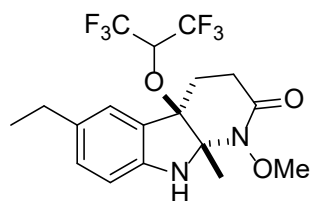

**3ae.** Yellow solid (29.8 mg, 63% yield). Analytical data for **3ae**: m.p. = 146-147 °C. **<sup>1</sup>H NMR (400 MHz, DMSO)** δ 7.38 (s, 1H), 6.98 (d, *J* = 8.1 Hz, 1H), 6.86 (s, 1H), 6.54 (d, *J* = 8.0 Hz, 1H), 5.15 – 5.09 (m, 1H), 3.60 (s, 3H), 2.57 – 2.55 (m, 1H), 2.49 – 2.44 (m, 2H), 2.38 – 2.28 (m, 1H), 2.10

- 1.90 (m, 2H), 1.56 (s, 3H), 1.09 (t,  $J = 7.5$  Hz, 3H).  $^{13}\text{C}$  NMR (100 MHz, DMSO)  $\delta$  164.6, 148.6, 134.0, 131.4, 125.0, 123.2, 110.3, 89.8, 87.4, 69.6, 69.3, 69.0, 68.7, 68.4, 63.8, 29.1, 28.2, 22.4, 18.2, 16.7.  $^{19}\text{F}$  NMR (376 MHz, DMSO)  $\delta$  -72.27 (q,  $J = 9.9$  Hz), -72.96 (q,  $J = 9.9$  Hz). IR (film): 3648, 2356, 1651, 1280, 1186, 1098, 884, 685  $\text{cm}^{-1}$ . HRMS (ESI) calcd for  $\text{C}_{17}\text{H}_{18}\text{F}_6\text{N}_2\text{NaO}_3^+$   $[\text{M}+\text{Na}]^+$ : 435.1114, Found: 435.1106.

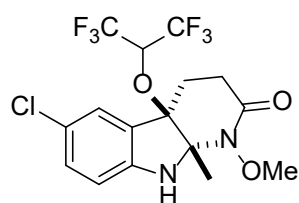

**3af.** Yellow solid (28.7 mg, 68% yield). Analytical data for **3af**: m.p. = 187-188 °C.  $^1\text{H}$  NMR (400 MHz, DMSO)  $\delta$  7.77 (s, 1H), 7.50 – 7.07 (m, 2H), 6.68 (d,  $J = 8.4$  Hz, 1H), 5.58 – 5.32 (m, 1H), 3.68 (s, 3H), 2.64 – 2.57 (m, 1H), 2.43 – 2.39 (m, 1H), 2.14 – 1.98 (m, 2H), 1.64 (s, 3H).  $^{13}\text{C}$  NMR (100 MHz, DMSO)  $\delta$  164.6, 149.4, 131.8, 125.70, 125.5, 121.7, 111.6, 89.8, 86.8, 69.6, 69.2, 68.9, 68.6, 68.3, 63.8, 28.8, 22.0, 18.0.  $^{19}\text{F}$  NMR (376 MHz, DMSO)  $\delta$  -72.37 (q,  $J = 9.9$  Hz), -72.90 (q,  $J = 10.0$  Hz). IR (film): 3434, 1656, 1281, 1189, 1097, 822, 492  $\text{cm}^{-1}$ . HRMS (ESI) calcd for  $\text{C}_{16}\text{H}_{15}\text{ClF}_6\text{N}_2\text{NaO}_3^+$   $[\text{M}+\text{Na}]^+$ : 445.0568, Found: 445.0577.

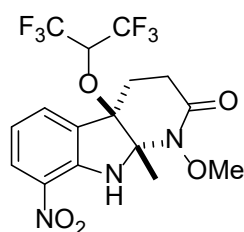

**3ag.** Brown solid (25.7 mg, 58% yield). Analytical data for **3ag**: m.p. = 114-115 °C.  $^1\text{H}$  NMR (400 MHz, DMSO)  $\delta$  7.29 (d,  $J = 2.6$  Hz, 1H), 6.82 (dd,  $J = 8.5, 2.5$  Hz, 1H), 6.68 – 6.58 (m, 2H), 5.33 – 5.27 (m, 1H), 3.71 (s, 3H), 3.65 (s, 3H), 2.59 – 2.57 (m, 1H), 2.42 – 2.32 (m, 1H), 2.14 – 1.98 (m, 2H), 1.61 (s, 3H).  $^{13}\text{C}$  NMR (100 MHz, DMSO)  $\delta$  164.6, 152.9, 144.6, 124.3, 118.0, 111.8, 111.3, 90.2, 87.5, 69.3, 69.0, 68.7, 63.8, 56.2, 29.0, 22.3, 18.3.  $^{19}\text{F}$  NMR (376 MHz, DMSO)  $\delta$  -72.22 (q,  $J = 9.8$  Hz), -72.70 (q,  $J = 9.8$  Hz). IR (film): 3150, 3070, 1690, 1184, 820, 639, 426  $\text{cm}^{-1}$ . HRMS (ESI) calcd for  $\text{C}_{16}\text{H}_{15}\text{F}_6\text{N}_3\text{NaO}_5^+$   $[\text{M}+\text{Na}]^+$ : 466.0808, Found: 466.0805.



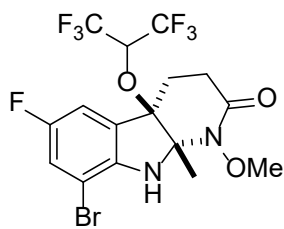

**3ah.** White solid (23.2 mg, 43% yield). Analytical data for **3ah**: m.p. = 158-159 °C.  $^1\text{H NMR}$  (400 MHz, DMSO)  $\delta$  7.67 (dd,  $J = 8.1, 2.5$  Hz, 1H), 7.43 (dd,  $J = 8.9, 2.5$  Hz, 1H), 7.09 (s, 1H), 5.50 – 5.44 (m, 1H), 3.66 (s, 3H), 2.68 – 2.54 (m, 1H), 2.47 – 2.34 (m, 1H), 2.20 – 2.04 (m, 2H), 1.67 (s, 3H).  $^{13}\text{C NMR}$  (100 MHz, DMSO)  $\delta$  164.3, 156.6, 154.3, 145.4, 126.4, 126.3, 123.4, 123.0, 121.3, 121.0, 120.6, 120.2, 113.1, 112.9, 102.1, 102.2, 89.6, 87.4, 87.40, 69.6, 69.2, 68.9, 68.6, 68.3, 64.0, 28.5, 22.0, 17.5.  $^{19}\text{F NMR}$  (376 MHz, DMSO)  $\delta$  -72.34 (q,  $J = 9.8$  Hz), -73.02 (q,  $J = 9.8$  Hz), -124.21. **IR (film)**: 2944, 2321, 1654, 1457, 1214, 1098, 894, 687  $\text{cm}^{-1}$ . **HRMS (ESI)** calcd for  $\text{C}_{16}\text{H}_{14}\text{ClBrF}_6\text{N}_2\text{NaO}_3^+$   $[\text{M}+\text{Na}]^+$ : 516.9968, Found: 516.9962.

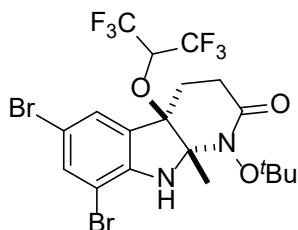

**3ai.** Yellow liquid (27.3 mg, 48% yield). Analytical data for **3ai**: m.p. = 166-167 °C.  $^1\text{H NMR}$  (400 MHz,  $\text{CDCl}_3$ )  $\delta$  7.54 (d,  $J = 1.7$  Hz, 1H), 7.19 – 7.15 (m, 1H), 5.12 (s, 1H), 4.00 – 3.95 (m, 1H), 2.55 – 2.46 (m, 1H), 2.37 – 2.26 (m, 3H), 1.65 (s, 3H), 1.19 (s, 9H).  $^{13}\text{C NMR}$  (100 MHz,  $\text{CDCl}_3$ )  $\delta$  171.5, 148.0, 137.2, 126.9, 110.8, 105.2, 89.6, 89.0, 84.2, 29.0, 28.0, 26.0, 22.7, 18.8, 14.1.  $^{19}\text{F NMR}$  (376 MHz,  $\text{CDCl}_3$ )  $\delta$  -72.75 (q,  $J = 9.5$  Hz), -73.31 (q,  $J = 9.6$  Hz). **IR (film)**: 3312, 2979, 1727, 1464, 1366, 1228, 1191, 1044, 685  $\text{cm}^{-1}$ . **HRMS (ESI)** calcd for  $\text{C}_{19}\text{H}_{21}\text{Br}_2\text{F}_6\text{N}_2\text{O}_3^+$   $[\text{M}+\text{H}]^+$ : 598.9797, Found: 598.9796.

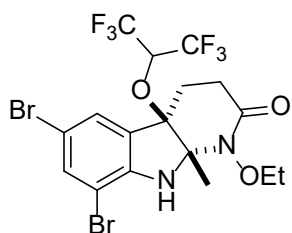

**3aj.** Yellow solid (32.2 mg, 54% yield). Analytical data for **3aj**: m.p. = 148-149 °C.  $^1\text{H NMR}$  (400 MHz,  $\text{CDCl}_3$ )  $\delta$  7.63 (d,  $J = 1.7$  Hz, 1H), 7.27 (d,  $J = 1.8$  Hz, 1H), 5.34 (s, 1H), 4.05 – 3.98 (m, 3H), 2.56 – 2.49 (m, 1H), 2.45 – 2.38 (m, 1H), 2.35 – 2.25 (m, 2H), 1.79 (s, 3H), 1.32 (t,  $J = 7.1$  Hz, 3H).  $^{13}\text{C NMR}$  (100 MHz,  $\text{CDCl}_3$ )  $\delta$  165.0, 148.3, 137.4, 127.0, 124.0, 111.3, 106.0, 89.6, 88.1, 72.4, 70.5, 70.2, 28.6, 24.3,

18.1, 13.6.  $^{19}\text{F}$  NMR (376 MHz,  $\text{CDCl}_3$ )  $\delta$  -72.54 (q,  $J = 9.5$  Hz), -72.79 (q,  $J = 9.6$  Hz), -73.33 (q,  $J = 9.6$  Hz), -73.55 (q,  $J = 9.5$  Hz). IR (film): 3214, 2981, 2901, 1723, 1672, 1606, 1466, 1362, 1189, 684  $\text{cm}^{-1}$ . HRMS (ESI) calcd for  $\text{C}_{17}\text{H}_{17}\text{Br}_2\text{F}_6\text{N}_2\text{O}_3^+$   $[\text{M}+\text{H}]^+$ : 570.9484, Found: 570.9481.

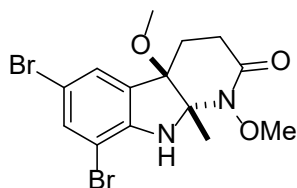

**3am.** Yellow solid (28.6 mg, 68% yield). Analytical data for **3am**: m.p. = 109-110 °C.  $^1\text{H}$  NMR (400 MHz,  $\text{CDCl}_3$ )  $\delta$  7.52 (d,  $J = 1.8$  Hz, 1H), 7.24 (d,  $J = 1.8$  Hz, 1H), 5.40 (s, 1H), 3.84 (s, 3H), 3.08 (s, 3H), 2.51 – 2.45 (m, 1H), 2.39 – 2.33 (m, 1H), 2.30 – 2.21 (m, 1H), 2.13 – 2.04 (m, 1H), 1.72 (s, 3H).  $^{13}\text{C}$  NMR (100 MHz,  $\text{CDCl}_3$ )  $\delta$  165.8, 146.9, 135.2, 127.4, 126.4, 111.1, 105.0, 88.3, 84.0, 64.0, 51.6, 28.6, 23.8, 18.1. IR (film): 3385, 2927, 1656, 1450, 1126, 1058, 711, 637  $\text{cm}^{-1}$ . HRMS (ESI) calcd for  $\text{C}_{14}\text{H}_{16}\text{Br}_2\text{N}_2\text{NaO}_3^+$   $[\text{M}+\text{Na}]^+$ : 442.9399, Found: 442.9430.

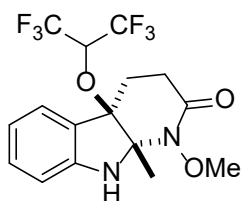

**3ba.** White solid (27.1 mg, 68% yield). Analytical data for **3ba**: m.p. = 123-124 °C.  $^1\text{H}$  NMR (400 MHz, DMSO)  $\delta$  7.58 (d,  $J = 7.4$  Hz, 1H), 7.21 (t,  $J = 7.7$  Hz, 1H), 7.15 (s, 1H), 6.75 (t,  $J = 7.4$  Hz, 1H), 6.68 (d,  $J = 7.9$  Hz, 1H), 5.23 – 5.17 (m, 1H), 3.67 (s, 3H), 2.64 – 2.59 (m, 1H), 2.42 – 2.37 (m, 1H), 2.16 – 2.08 (m, 1H), 2.06 – 1.96 (m, 1H), 1.64 (s, 3H).  $^{13}\text{C}$  NMR (100 MHz, DMSO)  $\delta$  164.6, 150.7, 132.2, 125.8, 123.0, 118.1, 110.5, 89.5, 87.3, 69.2, 68.9, 68.6, 63.8, 29.0, 22.3, 18.1.  $^{19}\text{F}$  NMR (376 MHz, DMSO)  $\delta$  -72.27 (q,  $J = 9.8$  Hz), -72.70 (q,  $J = 9.8$  Hz). IR (film): 1651, 1279, 1215, 1188, 1098, 890, 764, 685, 502  $\text{cm}^{-1}$ . HRMS (ESI) calcd for  $\text{C}_{16}\text{H}_{16}\text{F}_6\text{N}_2\text{NaO}_3^+$   $[\text{M}+\text{Na}]^+$ : 421.0957, Found: 421.0942.

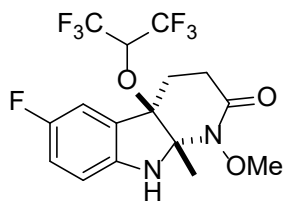

**3bb.** White solid (30.8 mg, 74% yield). Analytical data for **3bb**: m.p. = 150-151 °C.  $^1\text{H NMR}$  (400 MHz, DMSO)  $\delta$  7.61 (d,  $J = 7.4$  Hz, 1H), 7.37 (s, 1H), 7.31 (d,  $J = 8.0$  Hz, 1H), 6.78 (t,  $J = 7.7$  Hz, 1H), 5.37 – 5.31 (m, 1H), 3.66 (s, 3H), 2.66 – 2.62 (m, 1H), 2.46 – 2.33 (m, 1H), 2.18 – 2.10 (m, 1H), 2.09 – 1.98 (m, 1H), 1.68 (s, 3H).  $^{13}\text{C NMR}$  (100 MHz, DMSO)  $\delta$  164.3, 147.0, 131.8, 125.7, 124.5, 119.4, 114.5, 89.3, 87.4, 69.2, 68.9, 68.6, 64.0, 28.7, 22.1, 17.5.  $^{19}\text{F NMR}$  (377 MHz, DMSO)  $\delta$  -72.38 (q,  $J = 9.7$  Hz), -72.95 (q,  $J = 9.8$  Hz), -126.45. **IR (film)**: 1651, 1282, 1189, 1097, 889, 684, 500  $\text{cm}^{-1}$ . **HRMS (ESI)** calcd for  $\text{C}_{16}\text{H}_{15}\text{F}_7\text{N}_2\text{NaO}_3^+$   $[\text{M}+\text{Na}]^+$ : 439.0863, Found: 439.0856.

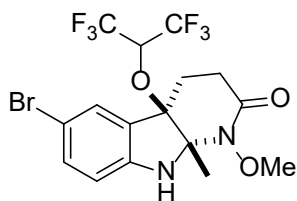

**3bc.** Yellow solid (19.5 mg, 41% yield). Analytical data for **3bc**: m.p. = 157-158 °C.  $^1\text{H NMR}$  (400 MHz, DMSO)  $\delta$  7.86 (d,  $J = 2.1$  Hz, 1H), 7.36 (s, 1H), 7.34 (d,  $J = 2.0$  Hz, 1H), 6.62 (d,  $J = 8.3$  Hz, 1H), 5.49 – 5.42 (m, 1H), 3.66 (s, 3H), 2.64 – 2.58 (m, 1H), 2.43 – 2.38 (m, 1H), 2.13 – 2.02 (m, 2H), 1.62 (s, 3H).  $^{13}\text{C NMR}$  (100 MHz, DMSO)  $\delta$  164.6, 149.8, 134.6, 128.4, 126.0, 125.8, 112.2, 110.5, 108.9, 89.6, 86.8, 69.6, 69.2, 68.9, 63.9, 28.8, 21.9, 18.0.  $^{19}\text{F NMR}$  (376 MHz, DMSO)  $\delta$  -72.27 (q,  $J = 9.9$  Hz), -72.79 (q,  $J = 9.6$  Hz). **IR (film)**: 3364, 3217, 1636, 1457, 1363, 1281, 1187, 685  $\text{cm}^{-1}$ . **HRMS (ESI)** calcd for  $\text{C}_{16}\text{H}_{15}\text{BrF}_6\text{N}_2\text{NaO}_3^+$   $[\text{M}+\text{Na}]^+$ : 499.0062, Found: 499.0069.

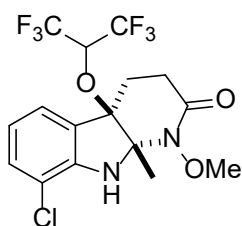

**3bd.** White solid (18.6 mg, 43% yield). Analytical data for **3bd**: m.p. = 157-158 °C.  $^1\text{H NMR}$  (400 MHz, DMSO)  $\delta$  7.58 (dd,  $J = 8.5, 2.7$  Hz, 1H), 7.17 – 6.93 (m, 2H), 6.66 (dd,  $J = 8.6, 4.3$  Hz, 1H), 5.43 – 5.37 (m, 1H), 3.67 (s, 3H), 2.68 – 2.55 (m, 1H), 2.49 – 2.33 (m, 1H), 2.21 – 2.00 (m, 2H), 1.63 (s, 3H).  $^{13}\text{C NMR}$  (100 MHz, DMSO)  $\delta$  164.6, 157.1, 154.8, 147.06, 124.7, 124.7, 123.4, 123.0, 120.7, 120.2, 118.6, 118.3,

113.2, 113.0, 111.1, 111.0, 90.2, 86.9, 86.9, 69.6, 69.3, 69.0, 68.6, 68.3, 63.8, 28.8, 22.1, 18.1. **<sup>19</sup>F NMR (376 MHz, DMSO)**  $\delta$  -72.27 (q,  $J$  = 9.9 Hz), -72.96 (q,  $J$  = 9.9 Hz). **IR (film)**: 3419, 2943, 1672, 1278, 1193, 1096, 683, 528  $\text{cm}^{-1}$ . **HRMS (ESI)** calcd for  $\text{C}_{16}\text{H}_{15}\text{ClF}_6\text{N}_2\text{NaO}_3^+$   $[\text{M}+\text{Na}]^+$ : 445.0568, Found: 445.0553.

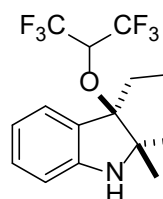

**3be.** White solid (17.8 mg, 43% yield). Analytical data for **3be**: m.p. = 138 - 139 °C. **<sup>1</sup>H NMR (400 MHz, CDCl<sub>3</sub>)**  $\delta$  7.29 (td,  $J$  = 7.7, 1.3 Hz, 1H), 7.16 (d,  $J$  = 7.5 Hz, 1H), 6.90 (td,  $J$  = 7.5, 0.9 Hz, 1H), 6.76 (d,  $J$  = 8.0 Hz, 1H), 5.14 (s, 1H), 4.21 – 4.13 (m, 1H), 4.01 – 3.87 (m, 2H), 2.52 – 2.46 (m, 1H), 2.46 – 2.41 (m, 1H), 2.36 – 2.28 (m, 1H), 2.27 – 2.18 (m, 1H), 1.75 (s, 3H), 1.29 (t,  $J$  = 7.1 Hz, 3H). **<sup>13</sup>C NMR (100 MHz, CDCl<sub>3</sub>)**  $\delta$  165.7, 150.6, 132.9, 125.6, 120.3, 119.9, 112.2, 90.0, 88.1, 72.2, 70.3, 69.9, 69.6, 29.1, 24.5, 18.5, 13.5. **<sup>19</sup>F NMR (377 MHz, CDCl<sub>3</sub>)**  $\delta$  -72.86 (q,  $J$  = 9.5 Hz), -73.25 (q,  $J$  = 9.5 Hz). **IR (film)**: 3396, 2948, 1664, 1279, 1178, 763, 686, 494  $\text{cm}^{-1}$ . **HRMS (ESI)** calcd for  $\text{C}_{17}\text{H}_{18}\text{F}_6\text{N}_2\text{NaO}_3^+$   $[\text{M}+\text{Na}]^+$ : 435.1114, Found: 435.1127.

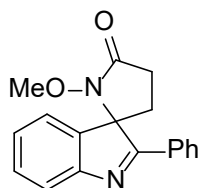

**4aa.** white solid (25.1 mg, 86% yield). Analytical data for **4aa**: m.p. = 115-116 °C. **<sup>1</sup>H NMR (400 MHz, DMSO)**  $\delta$  8.05 (dd,  $J$  = 7.9, 1.8 Hz, 2H), 7.64 (t,  $J$  = 6.7 Hz, 2H), 7.61 – 7.54 (m, 3H), 7.47 (t,  $J$  = 7.6 Hz, 1H), 7.34 (t,  $J$  = 7.7 Hz, 1H), 3.43 (s, 3H), 2.95 – 2.86 (m, 1H), 2.67 – 2.59 (m, 1H), 2.56 – 2.46 (m, 3H), 2.31 – 2.16 (m, 1H). **<sup>13</sup>C NMR (100 MHz, DMSO)**  $\delta$  176.7, 171.7, 152.7, 140.1, 132.0, 131.0, 130.5, 129.5, 128.2, 127.3, 122.8, 121.6, 75.6, 63.9, 26.1, 25.9. **IR (film)**: 2319, 11715, 1540, 1457, 1052, 773, 472  $\text{cm}^{-1}$ . **HRMS (ESI)** calcd for  $\text{C}_{18}\text{H}_{16}\text{N}_2\text{NaO}_2^+$   $[\text{M}+\text{Na}]^+$ : 315.1104, Found: 315.1104.

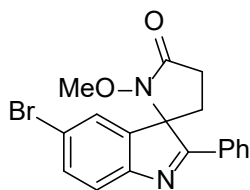

**4ab.** white solid (23.1mg, 79% yield). Analytical data for **4ab**: m.p. = 132-133 °C. <sup>1</sup>H NMR (400 MHz, DMSO) δ 8.06 (d, *J* = 7.3 Hz, 2H), 7.91 (s, 1H), 7.65 (d, *J* = 8.1 Hz, 1H), 7.61 – 7.50 (m, 4H), 3.45 (s, 3H), 3.01 – 2.95 (m, 1H), 2.66 – 2.61 (m, 1H), 2.56 – 2.45 (m, 1H), 2.32 – 2.24 (m, 1H). <sup>13</sup>C NMR (100 MHz, DMSO) δ 177.2, 171.7, 151.9, 142.6, 133.4, 132.2, 131.5, 129.6, 128.3, 126.0, 123.3, 120.2, 75.8, 64.0, 25.9, 25.7. IR (film): 2363, 1717, 1698, 1540, 1457, 695, 419 cm<sup>-1</sup>. HRMS (ESI) calcd for C<sub>18</sub>H<sub>15</sub>BrN<sub>2</sub>NaO<sub>2</sub><sup>+</sup> [M+Na]<sup>+</sup>: 393.0209, Found: 393.0195.

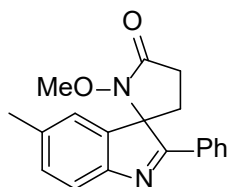

**4ac.** Yellow solid (19.9 mg, 65% yield). Analytical data for **4ac**: m.p. = 106-107 °C. <sup>1</sup>H NMR (400 MHz, CDCl<sub>3</sub>) δ 8.04 (dd, *J* = 7.6, 2.1 Hz, 2H), 7.63 – 7.42 (m, 4H), 7.28 – 7.20 (m, 2H), 3.62 (s, 3H), 2.86 – 2.78 (m, 1H), 2.66 – 2.59 (m, 1H), 2.56 – 2.48 (m, 1H), 2.44 (s, 3H), 2.30 – 2.23 (m, 1H). <sup>13</sup>C NMR (100 MHz, CDCl<sub>3</sub>) δ 175.6, 171.9, 150.7, 139.3, 137.1, 132.0, 131.3, 130.8, 129.0, 127.9, 122.3, 121.4, 75.6, 64.2, 26.3, 26.2, 21.5. IR (film): 2502, 1974, 1710, 1052, 774, 695, 587 cm<sup>-1</sup>. HRMS (ESI) calcd for C<sub>19</sub>H<sub>18</sub>N<sub>2</sub>NaO<sub>2</sub><sup>+</sup> [M+Na]<sup>+</sup>: 329.1260, Found: 329.1264.

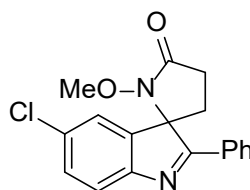

**4ad.** white solid (18.0 mg, 55% yield). Analytical data for **4ad**: m.p. = 131-132 °C. <sup>1</sup>H NMR (400 MHz, DMSO) δ 8.11 – 7.98 (m, 2H), 7.79 (d, *J* = 2.1 Hz, 1H), 7.66 – 7.50 (m, 5H), 3.44 (s, 3H), 2.83 – 2.75 (m, 1H), 2.65 – 2.57 (m, 1H), 2.56 – 2.45 (m, 1H), 2.30 – 2.23 (m, 1H). <sup>13</sup>C NMR (100 MHz, DMSO) δ 177.3, 171.7, 151.5, 142.3, 132.3, 131.9, 131.5, 130.5, 129.6, 128.3, 123.3, 122.9, 75.8, 64.0, 25.9, 25.7. IR (film): 1727, 1444, 1259, 1059, 827, 696, 562 cm<sup>-1</sup>. HRMS (ESI) calcd for C<sub>18</sub>H<sub>15</sub>ClN<sub>2</sub>NaO<sub>2</sub><sup>+</sup> [M+Na]<sup>+</sup>: 349.0714, Found: 349.0712.

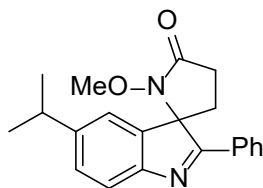

**4ae.** white solid (25.1 mg, 75% yield). Analytical data for **4ae**: m.p. = 107-108 °C.  $^1\text{H NMR}$  (300 MHz, DMSO)  $\delta$  8.07 – 7.93 (m, 2H), 7.61 – 7.46 (m, 5H), 7.31 (d,  $J$  = 8.0 Hz, 1H), 3.42 (s, 3H), 3.02 – 2.86 (m, 2H), 2.67 – 2.53 (m, 1H), 2.53 – 2.39 (m, 1H), 2.30 – 2.17 (m, 1H), 1.23 (d,  $J$  = 6.8 Hz, 6H).  $^{13}\text{C NMR}$  (75 MHz, DMSO)  $\delta$  176.1, 171.5, 151.0, 148.2, 140.3, 132.1, 131.7, 129.5, 128.1, 128.0, 121.3, 121.0, 75.5, 63.8, 34.0, 26.1, 26.0, 24.6, 24.4. **IR (film)**: 2924, 1718, 1507, 1320, 1051, 699, 660  $\text{cm}^{-1}$ . **HRMS (ESI)** calcd for  $\text{C}_{21}\text{H}_{22}\text{N}_2\text{NaO}_2^+$   $[\text{M}+\text{Na}]^+$ : 357.1573, Found: 357.1575.

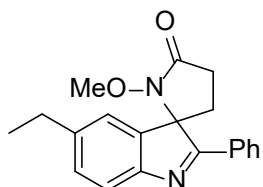

**4af.** white solid (16.7mg, 56% yield). Analytical data for **4af**: m.p. = 94-95°C.  $^1\text{H NMR}$  (300 MHz, DMSO)  $\delta$  8.13 – 7.92 (m, 2H), 7.63 – 7.41 (m, 5H), 7.29 (d,  $J$  = 7.9 Hz, 1H), 3.42 (s, 3H), 2.98 – 2.86 (m, 1H), 2.75 – 2.56 (m, 3H), 2.55 – 2.42 (m, 1H), 2.29 – 2.16 (m, 1H), 1.21 (t,  $J$  = 7.5 Hz, 3H).  $^{13}\text{C NMR}$  (75 MHz, DMSO)  $\delta$  175.8, 171.6, 150.8, 143.5, 140.4, 132.0, 131.8, 129.7, 129.5, 128.1, 122.3, 121.3, 75.5, 63.8, 28.6, 26.1, 26.0, 16.3. **IR (film)**: 2170, 1782, 1166, 1029, 843, 686, 422  $\text{cm}^{-1}$ . **HRMS (ESI)** calcd for  $\text{C}_{20}\text{H}_{21}\text{N}_2\text{O}_2^+$   $[\text{M}+\text{H}]^+$ : 321.1598, Found: 321.1601.

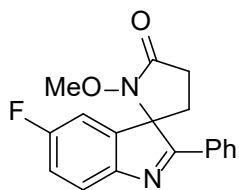

**4ag.** white solid (23.9 mg, 77% yield). Analytical data for **4ag**: m.p. = 118-119 °C.  $^1\text{H NMR}$  (300 MHz, DMSO)  $\delta$  8.09 – 7.92 (m, 2H), 7.70 – 7.51 (m, 5H), 7.32 – 7.26 (m, 1H), 3.45 (s, 3H), 3.02 – 2.90 (m, 1H), 2.69 – 2.54 (m, 1H), 2.52 – 2.44 (m, 1H), 2.31 – 2.22 (m, 1H).  $^{13}\text{C NMR}$  (75 MHz, DMSO)  $\delta$  177.0, 171.5, 163.4, 160.1, 149.0, 142.4, 142.3, 132.0, 131.7, 129.5, 128.1, 122.8, 122.7, 117.2, 116.8, 111.2, 110.9, 75.9, 75.8, 64.0, 26.0, 25.8. **IR (film)**: 2942, 1710, 1466, 1204, 1051, 778, 667  $\text{cm}^{-1}$ . **HRMS (ESI)** calcd for  $\text{C}_{18}\text{H}_{15}\text{FN}_2\text{NaO}_2^+$   $[\text{M}+\text{Na}]^+$ : 333.1010, Found: 333.1017.

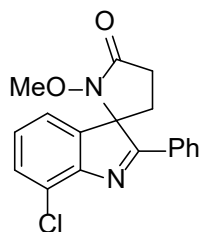

**4ah.** white solid (20.0 mg, 61% yield). Analytical data for **4ah**:  
 m.p. = 82-83 °C. <sup>1</sup>H NMR (400 MHz, DMSO) δ 8.08 (d, *J* = 6.9 Hz, 2H), 7.91 (d, *J* = 1.7 Hz, 1H), 7.83 (d, *J* = 1.7 Hz, 1H), 7.70 – 7.50 (m, 4H), 3.45 (s, 3H), 3.05 – 2.96 (m, 1H), 2.70 – 2.63 (m, 1H), 2.57 – 2.47 (m, 2H), 2.36 – 2.29 (m, 1H). <sup>13</sup>C NMR (100 MHz, DMSO) δ 178.3, 171.7, 148.6, 144.1, 133.0, 132.8, 131.1, 129.7, 128.5, 126.7, 125.0, 120.6, 77.0, 64.1, 25.8, 25.7. IR (film): 2936, 1684, 1483, 1169, 1008, 814, 692 cm<sup>-1</sup>. HRMS (ESI) calcd for C<sub>18</sub>H<sub>15</sub>ClN<sub>2</sub>NaO<sub>2</sub><sup>+</sup> [M+Na]<sup>+</sup>: 349.0714, Found: 349.0713.

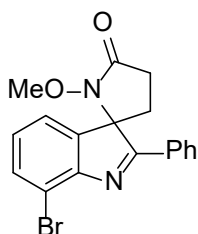

**4ai.** White solid (25.7 mg, 83% yield). Analytical data for **4ai**:  
 m.p. = 127-128 °C. <sup>1</sup>H NMR (400 MHz, CDCl<sub>3</sub>) δ 8.02 (dd, *J* = 8.7, 5.5 Hz, 2H), 7.65 (d, *J* = 7.6 Hz, 1H), 7.44 (dd, *J* = 13.1, 7.0 Hz, 2H), 7.29 (t, *J* = 7.4 Hz, 1H), 7.18 (d, *J* = 17.3 Hz, 2H), 3.59 (s, 3H), 2.81 – 2.75 (m, 1H), 2.66 – 2.58 (m, 1H), 2.55 – 2.48 (m, 1H), 2.31 – 2.22 (m, 1H). <sup>13</sup>C NMR (100 MHz, CDCl<sub>3</sub>) δ 175.7, 171.6, 165.9, 152.7, 139.0, 130.4, 130.3, 130.2, 128.2, 128.2, 126.9, 121.8, 121.6, 116.4, 116.1, 75.7, 64.3, 26.3, 26.2. IR (film): 2976, 1736, 1529, 1458, 1365, 761, 695 cm<sup>-1</sup>. HRMS (ESI) calcd for C<sub>18</sub>H<sub>15</sub>BrN<sub>2</sub>NaO<sub>2</sub><sup>+</sup> [M+Na]<sup>+</sup>: 371.0390, Found: 371.0413.

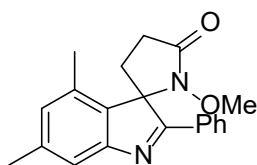

**4aj.** White solid (24.7 mg, 77% yield). Analytical data for **4aj**: m.p. = 137-138 °C. <sup>1</sup>H NMR (400 MHz, CDCl<sub>3</sub>) δ 7.93 – 7.90 (m, 2H), 7.47 – 7.44 (m, 3H), 7.29 (d, *J* = 2.2 Hz, 1H), 6.86 (d, *J* = 3.7 Hz, 1H), 3.55 (d, *J* = 4.5 Hz, 3H), 2.78 – 2.55 (m, 2H), 2.39 (d, *J* = 4.6 Hz, 2H), 2.37 (d, *J* = 4.1 Hz, 3H), 2.34 (d, *J* = 3.6 Hz, 3H). <sup>13</sup>C NMR (100 MHz, CDCl<sub>3</sub>) δ 177.4, 171.1, 153.6, 140.4, 133.3, 132.8, 131.9, 131.2, 129.9, 129.1, 127.7, 120.4, 75.1, 63.5, 26.4, 22.9, 21.5, 17.2. IR (film): 2942, 1707, 1535, 1460, 1055, 863, 701, 634 cm<sup>-1</sup>. HRMS (ESI) calcd for C<sub>20</sub>H<sub>20</sub>N<sub>2</sub>NaO<sub>2</sub><sup>+</sup> [M+Na]<sup>+</sup>: 343.1417, Found: 343.1420

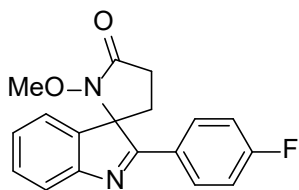

**4ak.** White solid (25.7 mg, 83% yield). Analytical data for **4ak**: m.p. = 145-146 °C.  $^1\text{H NMR}$  (400 MHz,  $\text{CDCl}_3$ )  $\delta$  8.02 (dd,  $J = 8.7, 5.5$  Hz, 2H), 7.65 (d,  $J = 7.6$  Hz, 1H), 7.44 (dd,  $J = 13.1, 7.0$  Hz, 2H), 7.29 (t,  $J = 7.4$  Hz, 1H), 7.18 (d,  $J = 17.3$  Hz, 2H), 3.59 (s, 3H), 2.85 – 2.76 (m, 1H), 2.63 – 2.55 (m, 1H), 2.49 – 2.41 (m, 1H), 2.30 – 2.23 (m, 1H).  $^{13}\text{C NMR}$  (100 MHz,  $\text{CDCl}_3$ )  $\delta$  175.7, 171.6, 165.9, 152.7, 139.0, 130.4, 130.3, 130.2, 128.2, 128.2, 126.9, 121.8, 121.6, 116.4, 116.1, 75.7, 64.3, 26.3, 26.2.  $^{19}\text{F NMR}$  (376 MHz, DMSO)  $\delta$  -108.08. **IR (film)**: 2976, 1736, 1529, 1458, 1365, 761, 695  $\text{cm}^{-1}$ . **HRMS (ESI)** calcd for  $\text{C}_{18}\text{H}_{15}\text{FN}_2\text{NaO}_2^+$   $[\text{M}+\text{Na}]^+$ : 333.1010, Found: 333.1017.

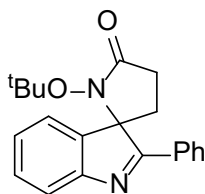

**4al.** white solid (24.6 mg, 84% yield). Analytical data for **4al**: m.p. = 125-126 °C.  $^1\text{H NMR}$  (400 MHz,  $\text{CDCl}_3$ )  $\delta$  8.00 – 7.87 (m, 2H), 7.62 (dd,  $J = 7.5, 3.8$  Hz, 1H), 7.52 – 7.36 (m, 5H), 7.31 – 7.28 (m, 1H), 2.83 – 2.68 (m, 1H), 2.53 – 2.38 (m, 2H), 2.35 – 2.25 (m, 1H), 0.95 (s, 9H).  $^{13}\text{C NMR}$  (100 MHz,  $\text{CDCl}_3$ )  $\delta$  178.2, 176.2, 153.1, 140.1, 132.4, 131.1, 123.0, 128.9, 128.4, 126.6, 122.5, 121.5, 83.5, 77.2, 27.6, 26.7, 26.3. **IR (film)**: 2976, 1736, 1529, 1458, 1365, 761, 695  $\text{cm}^{-1}$ . **HRMS (ESI)** calcd for  $\text{C}_{21}\text{H}_{22}\text{N}_2\text{NaO}_2^+$   $[\text{M}+\text{Na}]^+$ : 357.1573, Found: 357.1573.

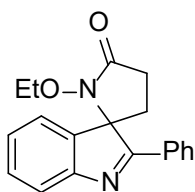

**4am.** White solid (27.2 mg, 89% yield). Analytical data for **4am**: m.p. = 130-131 °C.  $^1\text{H NMR}$  (400 MHz,  $\text{CDCl}_3$ )  $\delta$  7.97 (dd,  $J = 7.7, 1.9$  Hz, 2H), 7.63 (dd,  $J = 7.2, 1.4$  Hz, 1H), 7.50 – 7.36 (m, 5H), 7.27 – 7.23 (m, 1H), 3.92 – 3.82 (m, 1H), 3.69 – 3.65 (m, 1H), 2.75 – 2.71 (m, 1H), 2.57 – 2.49 (m, 1H), 2.47 – 2.39 (m, 1H), 2.26 – 2.19 (m, 1H), 0.94 (t,  $J = 7.1$  Hz, 3H).  $^{13}\text{C NMR}$  (100 MHz,  $\text{CDCl}_3$ )  $\delta$  177.0, 171.9, 152.9, 139.3, 132.0, 131.4, 130.2, 129.0, 127.9, 126.8, 121.7, 121.7, 76.0, 72.5, 26.3, 26.1, 13.6. **IR (film)**: 2923,



1710, 1455, 1259, 1057, 762, 698  $\text{cm}^{-1}$ . **HRMS (ESI)** calcd for  $\text{C}_{19}\text{H}_{18}\text{N}_2\text{NaO}_2^+$   $[\text{M}+\text{Na}]^+$ : 329.1260, Found: 329.1255.

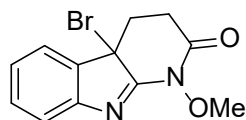

**5a.** White solid (24.4 mg, 83% yield). Analytical data for **5a**: m.p. = 109-110  $^{\circ}\text{C}$ .  **$^1\text{H}$  NMR (400 MHz, DMF)**  $\delta$  7.68 (d,  $J$  = 7.4 Hz, 1H), 7.52 – 7.40 (m, 2H), 7.30 – 7.26 (m, 1H), 3.99 (s, 3H), 3.15 – 3.07 (m, 1H), 3.01 – 2.94 (m, 1H), 2.84 – 2.78 (m, 1H), 2.32 – 2.24 (m, 1H).  **$^{13}\text{C}$  NMR (100 MHz, DMF)**  $\delta$  163.7, 132.2, 126.7, 124.3, 121.3, 64.1, 36.6, 36.4, 33.0, 31.5, 31.3, 31.1, 30.8, 30.6, 30.4, 30.2. **IR (film)**: 2956, 1713, 1520, 1260, 1198, 762, 698  $\text{cm}^{-1}$ . **HRMS (ESI)** calcd for  $\text{C}_{12}\text{H}_{11}\text{BrN}_2\text{NaO}_2^+$   $[\text{M}+\text{Na}]^+$ : 316.9896, Found: 316.9890.

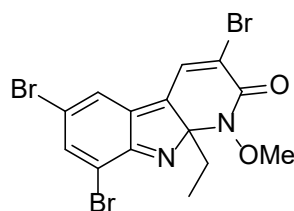

**6a.** Yellow solid (34.4 mg, 72% yield). Analytical data for **6a**: m.p. = 86-87  $^{\circ}\text{C}$ .  **$^1\text{H}$  NMR (400 MHz, DMSO)**  $\delta$  7.90 (s, 1H), 7.84 (s, 1H), 6.75 (s, 1H), 3.99 (s, 3H), 2.34 – 2.27 (m, 1H), 2.08 – 2.01 (m, 1H), 0.52 (t,  $J$  = 7.3 Hz, 3H).  **$^{13}\text{C}$  NMR (100 MHz,  $\text{CDCl}_3$ )**  $\delta$  169.5, 160.4, 150.9, 142.9, 137.5, 135.4, 125.9, 125.3, 118.0, 114.7, 65.8, 64.7, 38.7, 8.2. **IR (film)**: 2936, 1684, 1483, 1169, 1008, 814, 692  $\text{cm}^{-1}$ . **HRMS (ESI)** calcd for  $\text{C}_{14}\text{H}_{12}\text{Br}_3\text{N}_2\text{O}_2$   $[\text{M}+\text{H}]^+$ : 478.8423, Found: 478.8408.

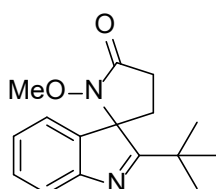

**8a.** Light Yellow solid (23.2 mg, 85% yield). Analytical data for **8a**: m.p. = 125-126  $^{\circ}\text{C}$ .  **$^1\text{H}$  NMR (400 MHz, DMSO)**  $\delta$  7.38 (d,  $J$  = 7.6 Hz, 1H), 7.31 (m, 2H), 7.11 (t,  $J$  = 7.4 Hz, 1H), 3.95 (s, 3H), 3.01 – 2.91 (m, 1H), 2.76 – 2.69 (m, 1H), 2.63 – 2.60 (m, 1H), 1.70 – 1.62 (m, 1H), 0.90 (s, 9H).  **$^{13}\text{C}$  NMR (100 MHz, DMSO)**  $\delta$  171.5, 168.5, 154.6, 141.9, 128.5, 123.8, 123.6, 119.1, 63.7, 60.4, 37.4, 31.6, 26.9, 21.2. **IR (film)**: 2944, 1699,

1566, 1272, 1176, 773, 595  $\text{cm}^{-1}$ . **HRMS (ESI)** calcd for  $\text{C}_{16}\text{H}_{20}\text{N}_2\text{NaO}_2^+$   $[\text{M}+\text{Na}]^+$ :  
295.1417, Found: 295.1416.

### X-Ray crystal structure of 3aa (CCDC 2213700)

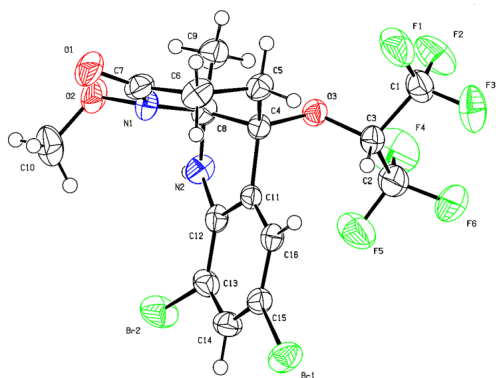

Bond precision: C-C = 0.0099 Å

Wavelength=0.71073

Cell: a=8.5935 (8)  
alpha=90

b=10.4364 (9)  
beta=94.610 (3)

c=10.8779 (9)  
gamma=90

Temperature: 296 K

|                        | Calculated           | Reported             |
|------------------------|----------------------|----------------------|
| Volume                 | 972.43 (15)          | 972.43 (15)          |
| Space group            | P n                  | P 1 n 1              |
| Hall group             | P -2yac              | P -2yac              |
| Moiety formula         | C16 H14 Br2 F6 N2 O3 | C16 H14 Br2 F6 N2 O3 |
| Sum formula            | C16 H14 Br2 F6 N2 O3 | C16 H14 Br2 F6 N2 O3 |
| Mr                     | 556.09               | 556.11               |
| Dx, g cm <sup>-3</sup> | 1.899                | 1.899                |
| Z                      | 2                    | 2                    |
| Mu (mm <sup>-1</sup> ) | 4.245                | 4.245                |
| F000                   | 544.0                | 544.0                |
| F000'                  | 543.24               |                      |
| h, k, lmax             | 11, 13, 14           | 11, 13, 14           |
| Nref                   | 4479 [ 2246]         | 4345                 |
| Tmin, Tmax             | 0.375, 0.712         | 0.335, 0.746         |
| Tmin'                  | 0.333                |                      |

Correction method= # Reported T Limits: Tmin=0.335 Tmax=0.746

AbsCorr = MULTI-SCAN

Data completeness= 1.93/0.97

Theta(max)= 27.510

R(reflections)= 0.0427 ( 3460)

wR2(reflections)=  
0.1087 ( 4345)

S = 1.037

Npar= 264

## X-Ray crystal structure of 4aa (CCDC 2213712)

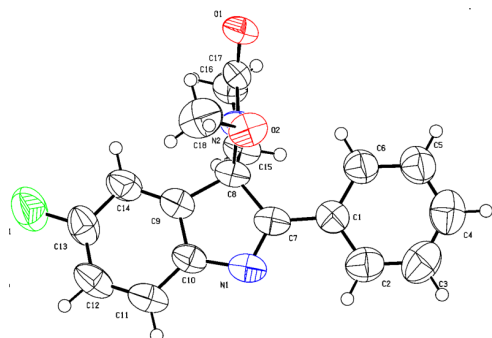

Bond precision: C-C = 0.0041 Å      Wavelength=0.71073  
Cell: a=11.1831(13)      b=11.7646(14)      c=12.1011(15)  
alpha=90      beta=103.533(3)      gamma=90  
Temperature: 296 K

|                        | Calculated      | Reported        |
|------------------------|-----------------|-----------------|
| Volume                 | 1547.9(3)       | 1547.9(3)       |
| Space group            | P 21/c          | P 1 21/c 1      |
| Hall group             | -P 2ybc         | -P 2ybc         |
| Moiety formula         | C18 H15 F N2 O2 | C18 H15 F N2 O2 |
| Sum formula            | C18 H15 F N2 O2 | C18 H15 F N2 O2 |
| Mr                     | 310.32          | 310.32          |
| Dx, g cm <sup>-3</sup> | 1.332           | 1.332           |
| Z                      | 4               | 4               |
| Mu (mm <sup>-1</sup> ) | 0.096           | 0.096           |
| F000                   | 648.0           | 648.0           |
| F000'                  | 648.33          |                 |
| h, k, lmax             | 13, 14, 15      | 13, 14, 15      |
| Nref                   | 3173            | 3165            |
| Tmin, Tmax             | 0.983, 0.995    | 0.551, 0.745    |
| Tmin'                  | 0.944           |                 |

Correction method= # Reported T Limits: Tmin=0.551 Tmax=0.745  
AbsCorr = MULTI-SCAN

Data completeness= 0.997      Theta(max)= 26.403

R(reflections)= 0.0583( 1428)      wR2(reflections)=  
S = 1.010      Npar= 209      0.1541( 3165)

## References

- (1) Zlotin, S. G.; Kryshnal, G.V.; Zhdankina, G. M. *Eur. J. Org. Chem.* **2005**, 13 2822–2827.
- (2) Y, Wang.; Y, Zhou.; X.-X. Ma.; and Q.-L. Song. *Org. Lett.* **2021**, 23, 5599-5604.
- (3) W. Xiao, Y. Mo, J. Guo, Z. Su, S. Dong and X. Feng, *Chem. Sci.*, **2021**, 12, 2940–2947.

- (4) V. Terrasson, J. Michaux, A. Gaucher, J. Wehbe, S. Marque, D. Prim, J.-M. Campagne, *Eur. J. Org. Chem.* **2007**, 5332– 5335.
- (5) J.-Q. Zhang, S.-Z. Zhang, Thirupathi, G, and H.-B. Zou. *ACS Catal.* **2020**, *10*, 7486-7494.
- (6) Elena, D. V.; Peter S.; Scott L.; Jasmin L.; Sven K.; Eitan R.; Amiram S.; Bernd H.; Veronique H.; Niv P.; Jochen H.; Edward, W. T.; Nikolas G and Aubry K. M.; *J. Med. Chem.* **2018**, *61*, 8859–8874.

## NMR Spectra of products

### $^1\text{H}$ NMR , $^{13}\text{C}$ NMR and $^{19}\text{F}$ NMR spectra of 3aa

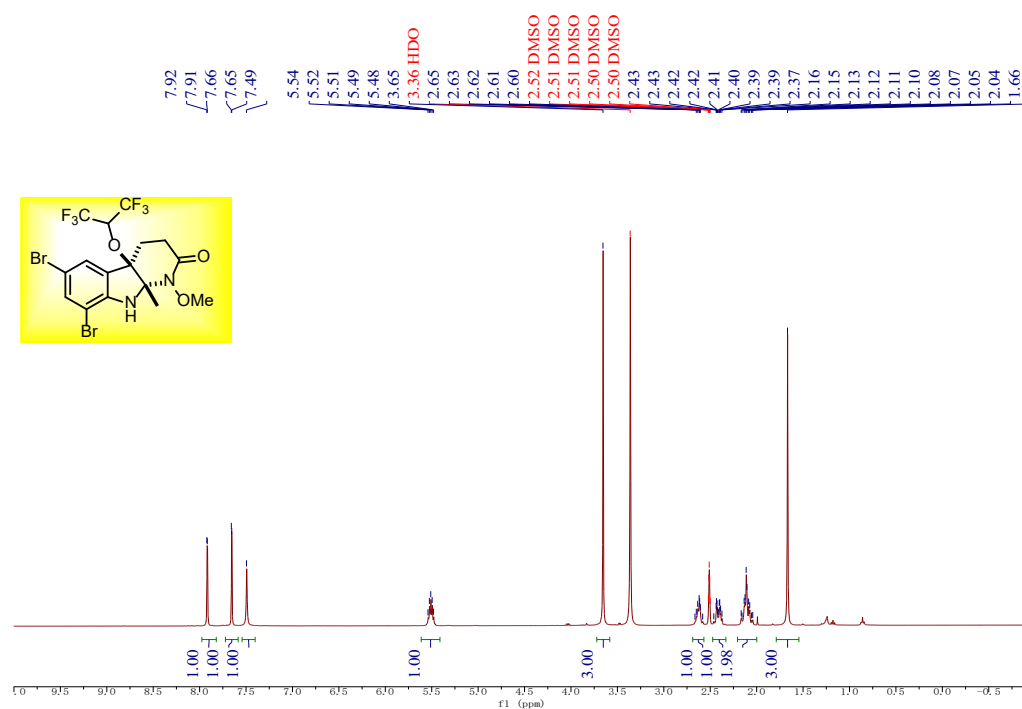

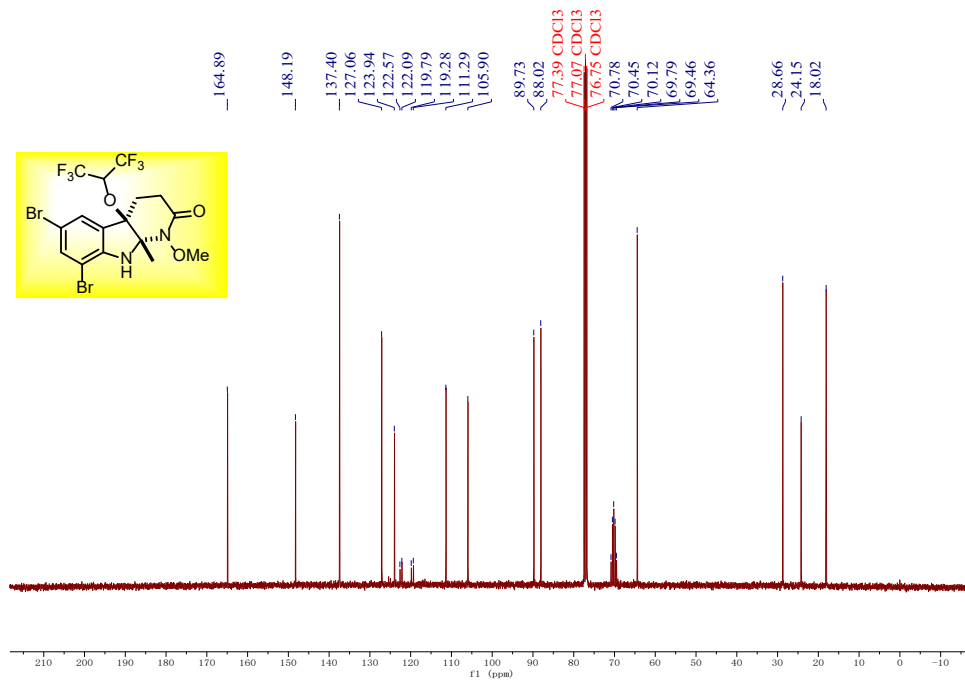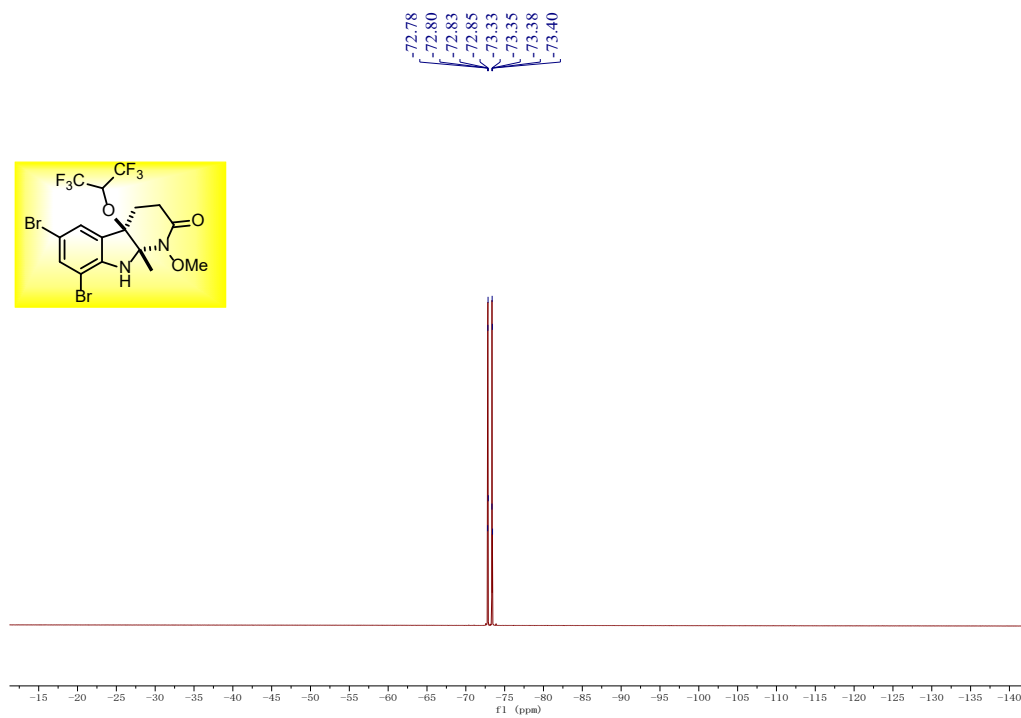

**$^1\text{H}$  NMR ,  $^{13}\text{C}$  NMR and  $^{19}\text{F}$  NMR spectra of 3ab**

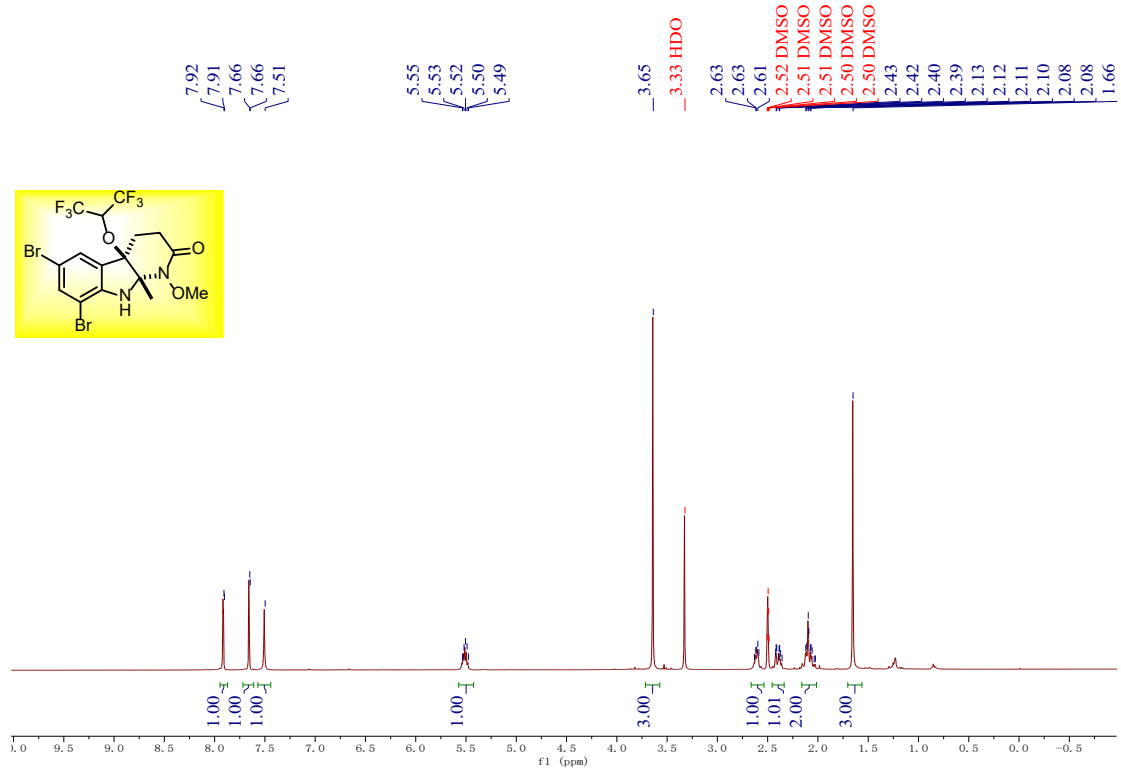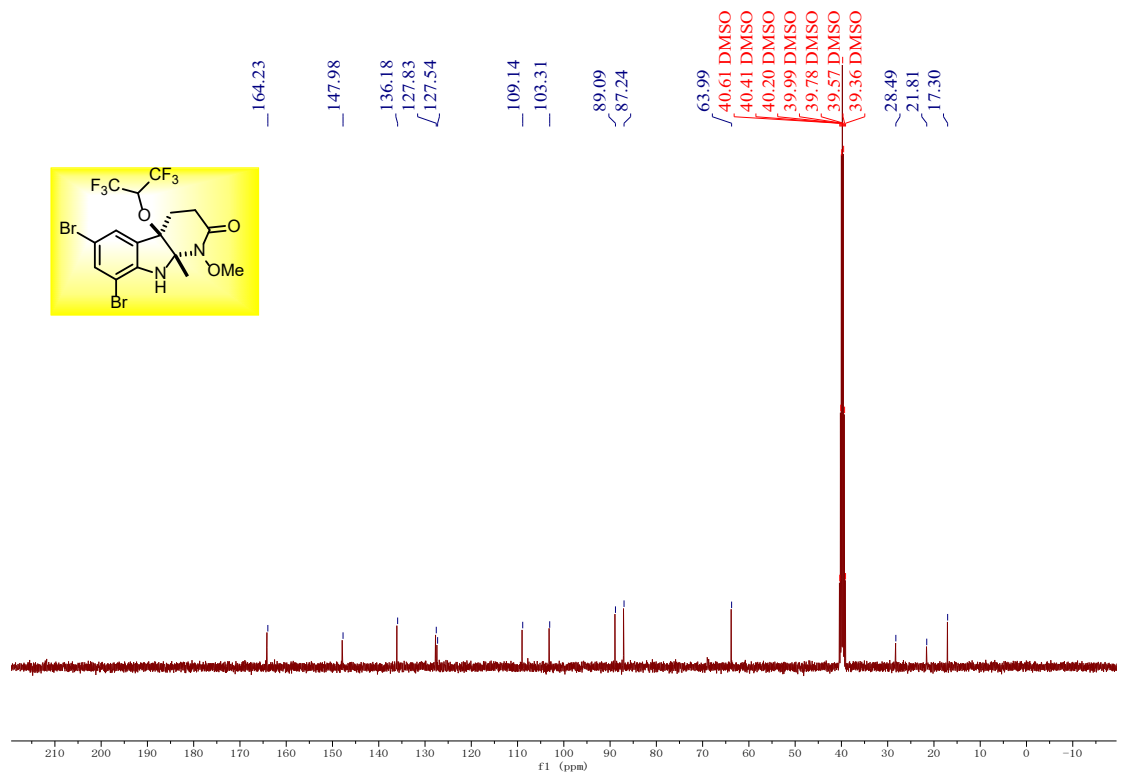

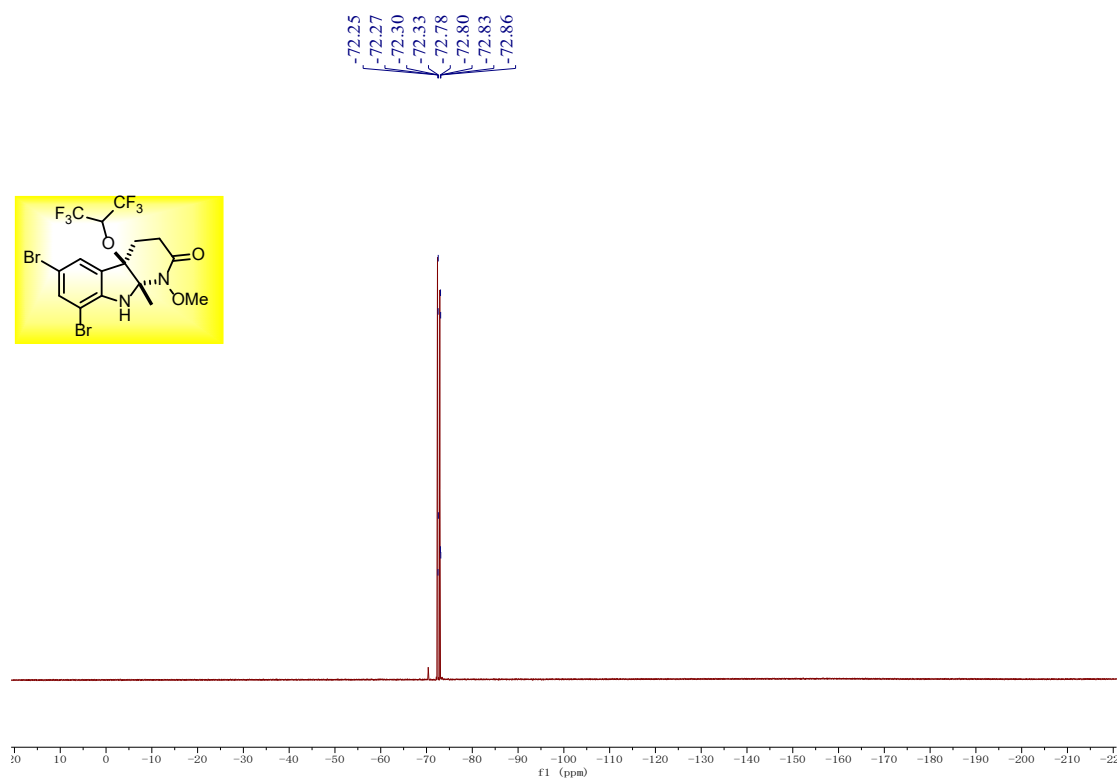

### $^1\text{H}$ NMR , $^{13}\text{C}$ NMR and $^{19}\text{F}$ NMR spectra of 3ac

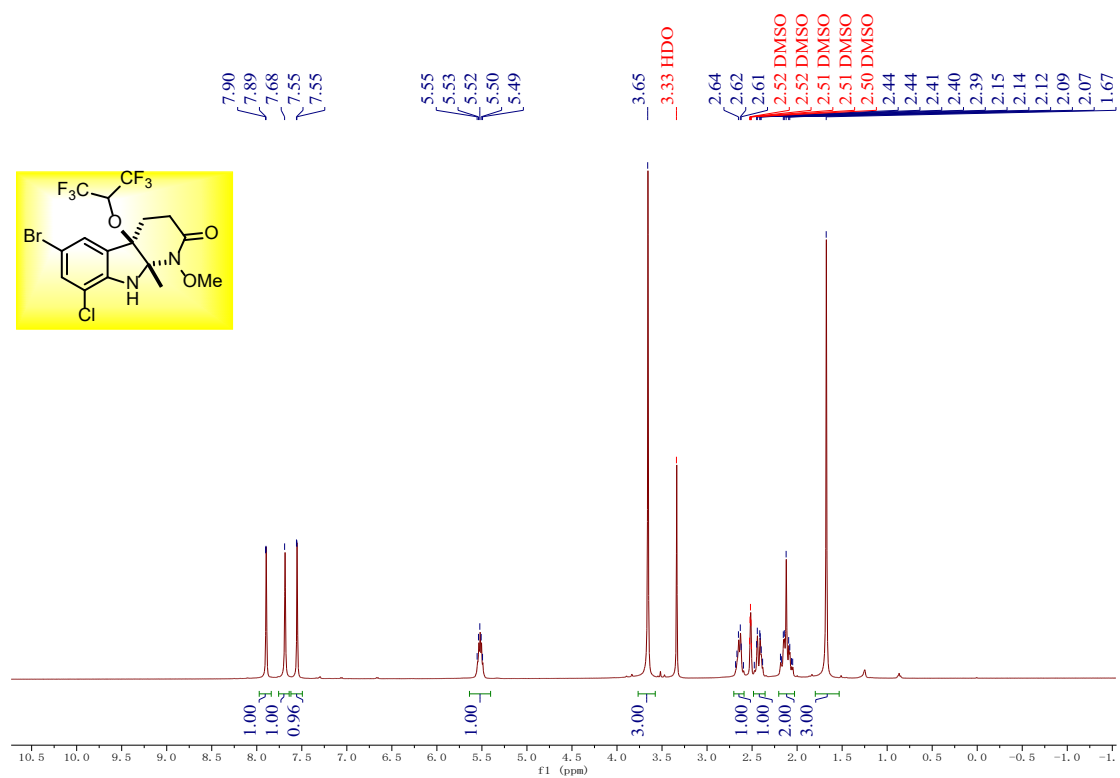

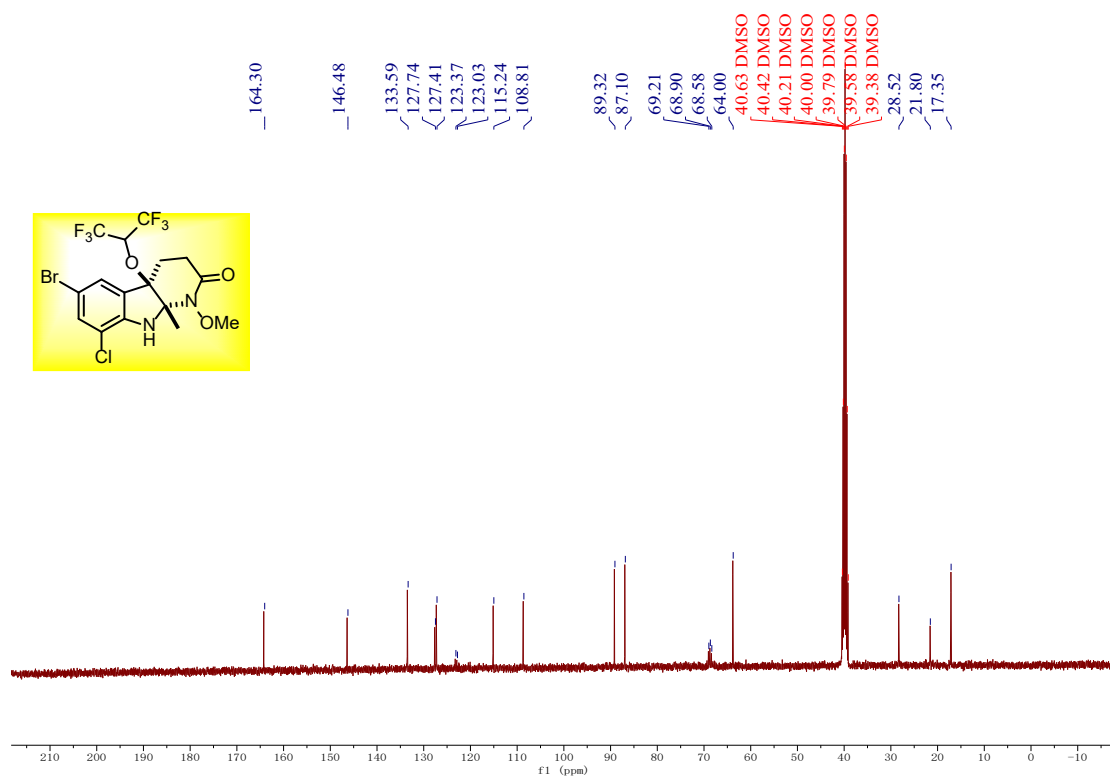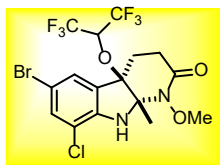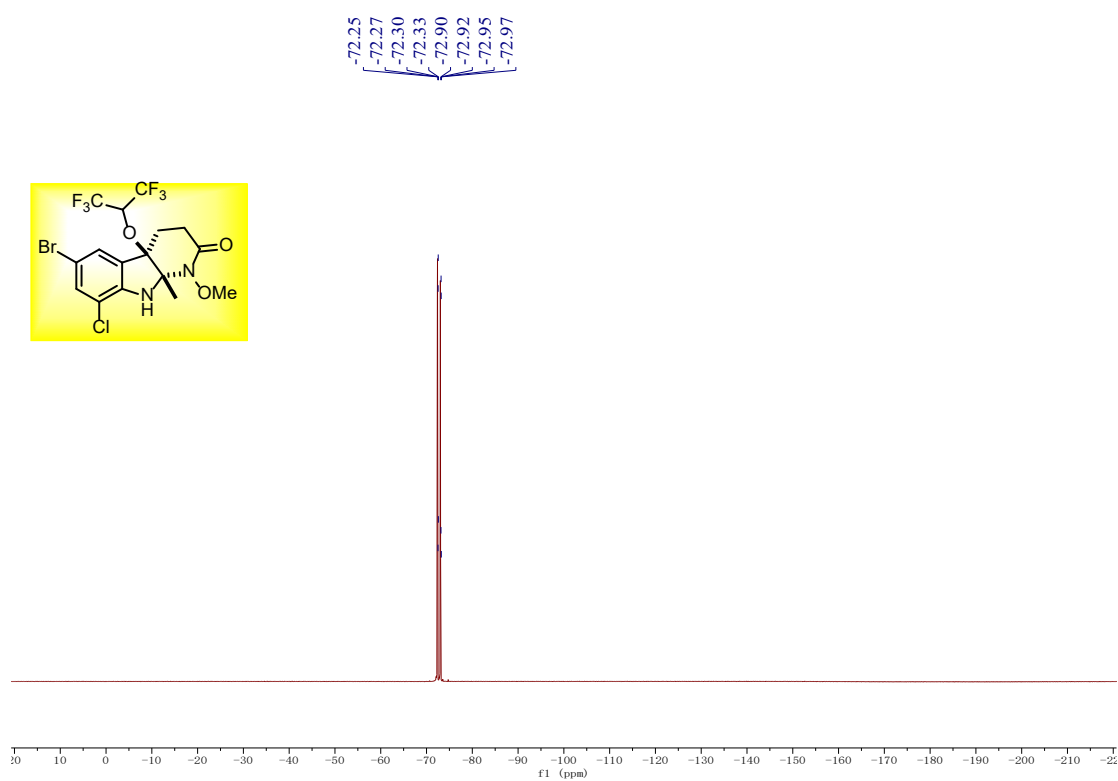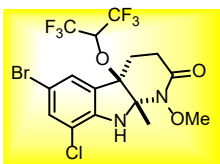

**<sup>1</sup>H NMR , <sup>13</sup>C NMR and <sup>19</sup>F NMR spectra of 3ad**



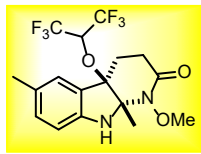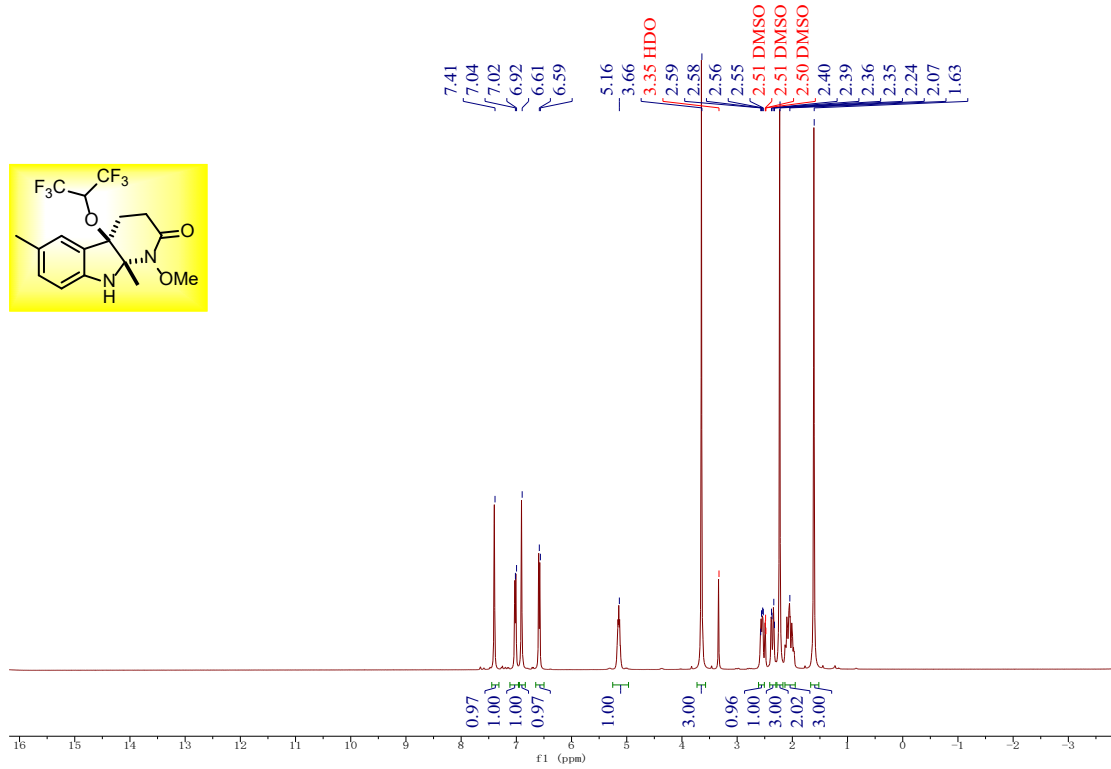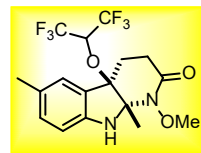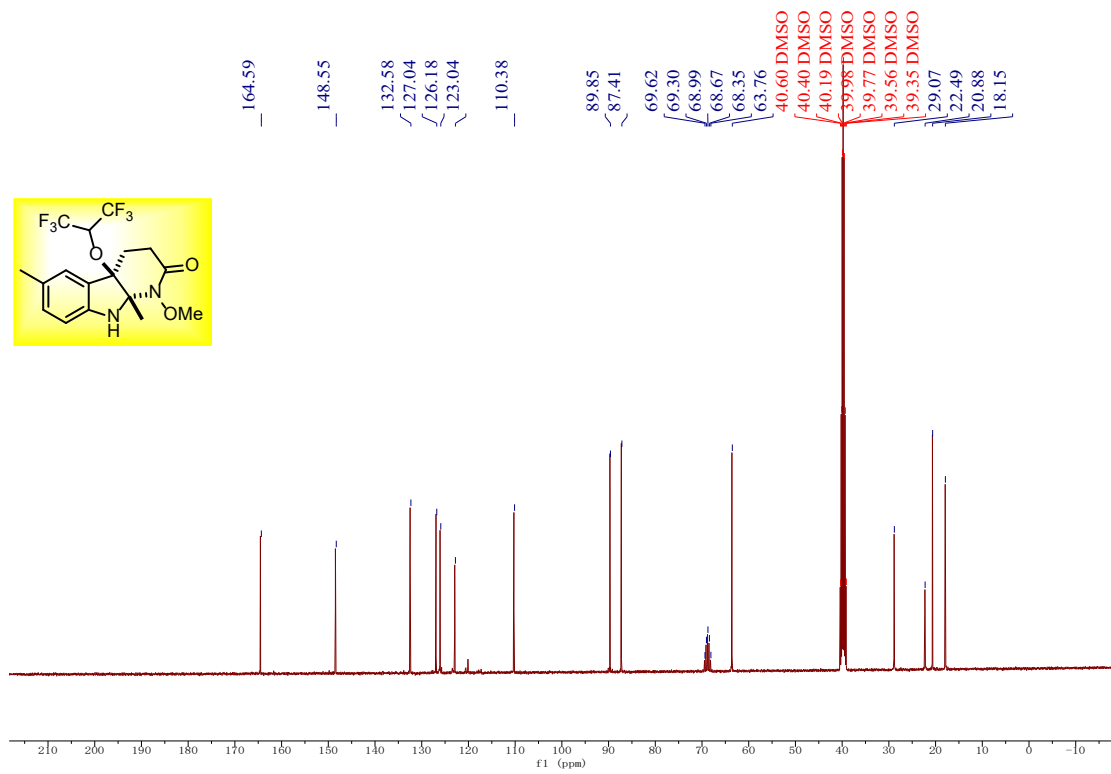

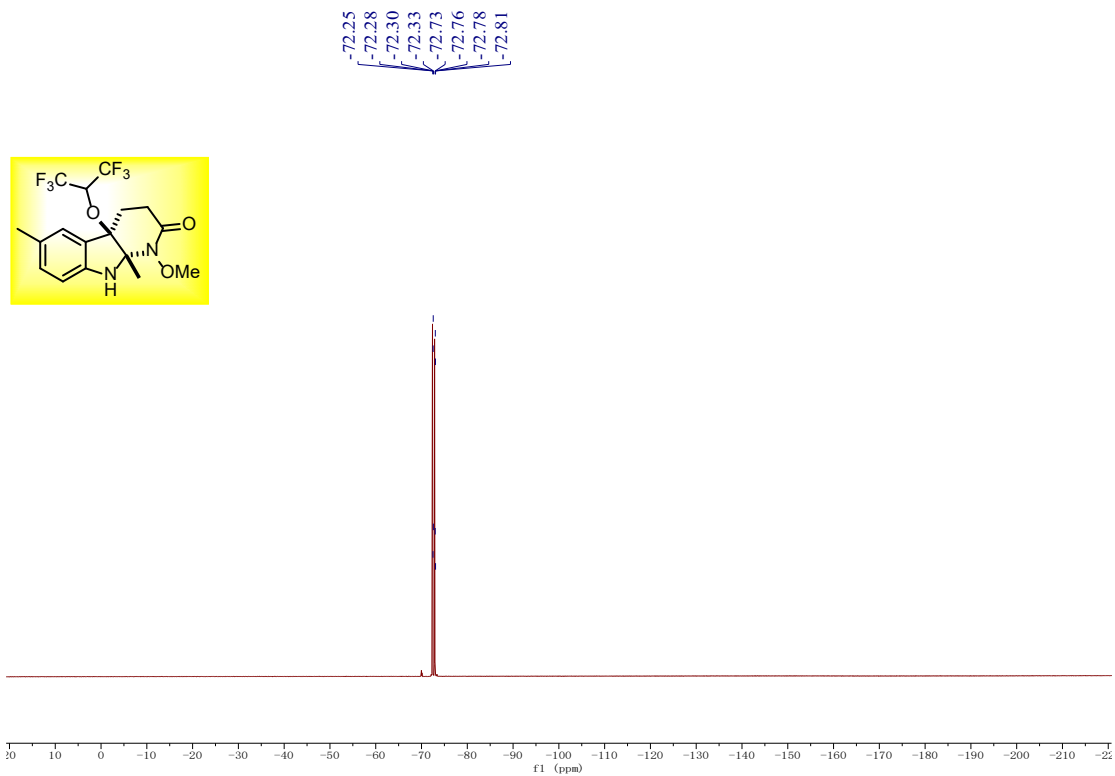

### $^1\text{H}$ NMR, $^{13}\text{C}$ NMR and $^{19}\text{F}$ NMR spectra of 3ae

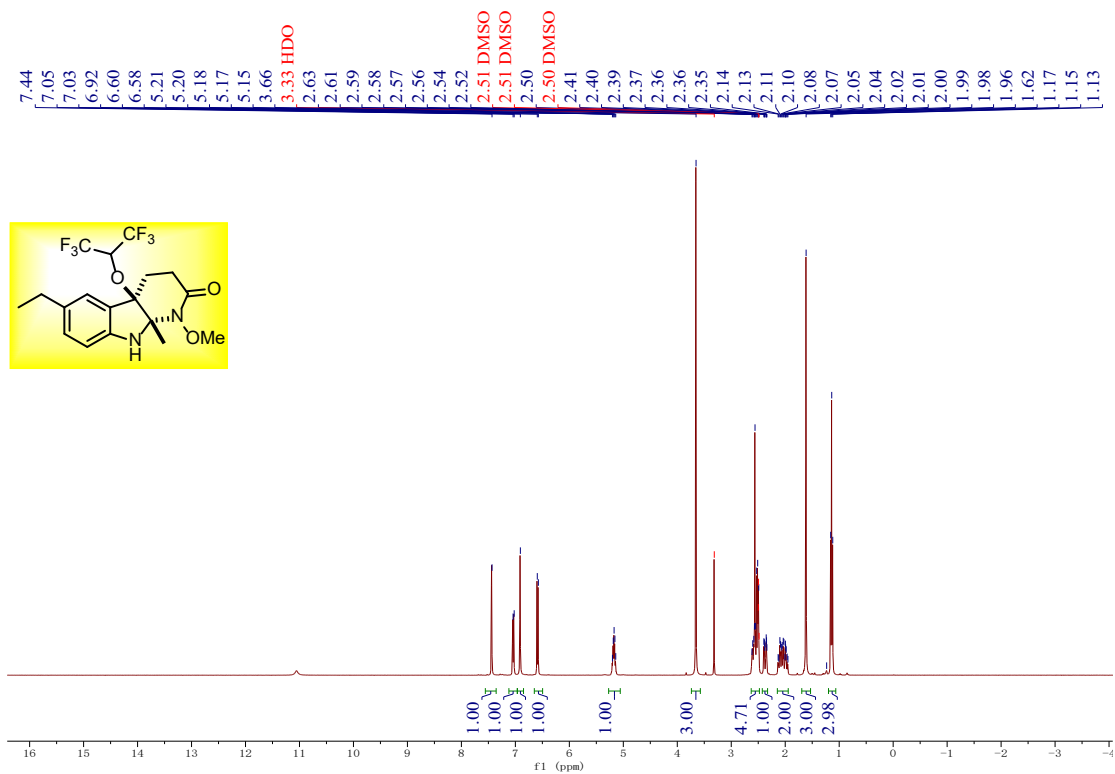

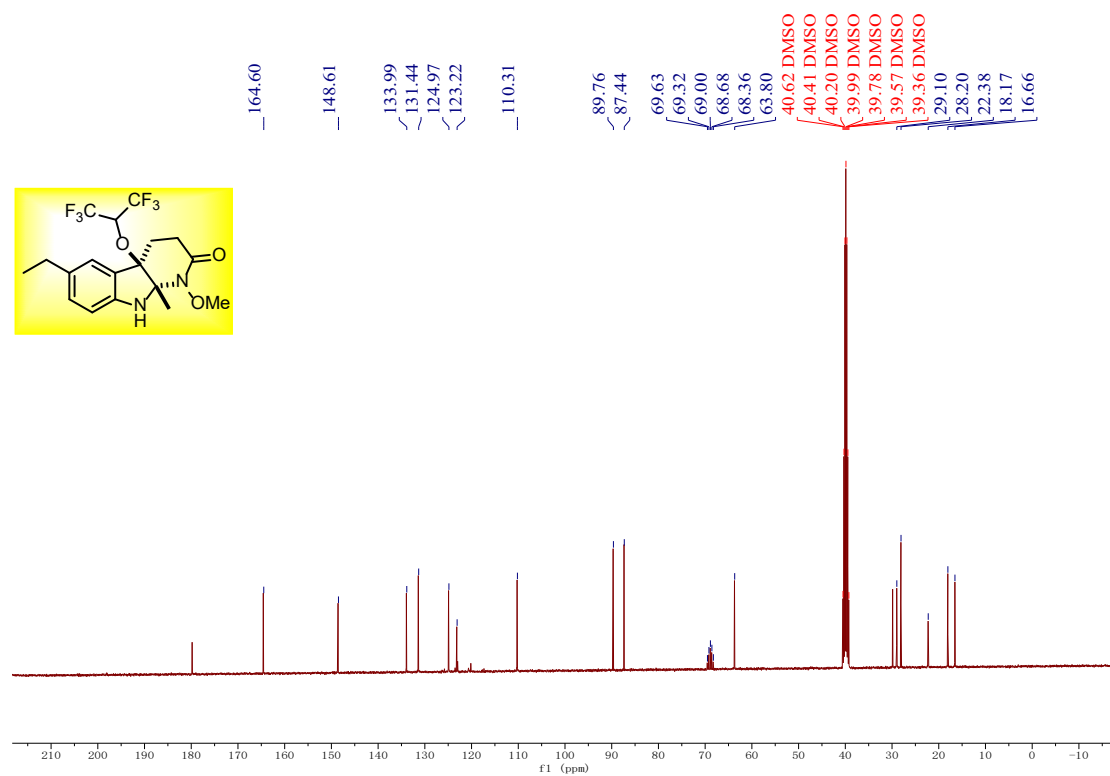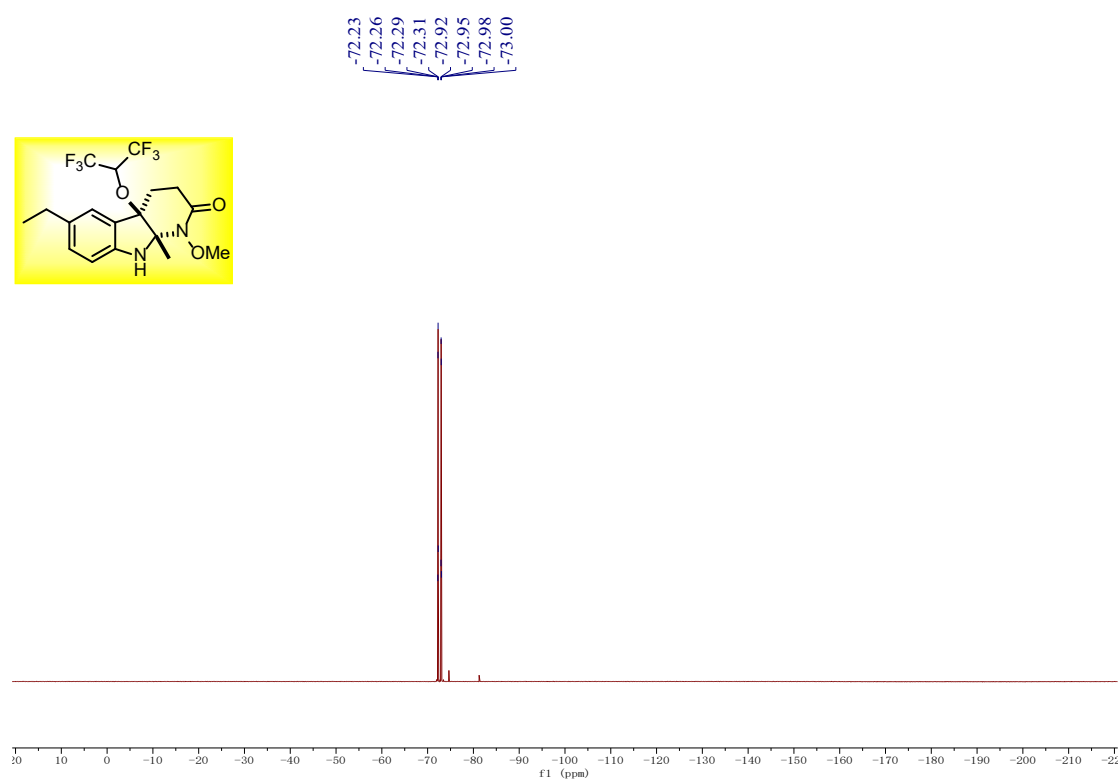

$^1\text{H}$  NMR,  $^{13}\text{C}$  NMR and  $^{19}\text{F}$  NMR spectra of 3af

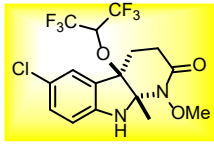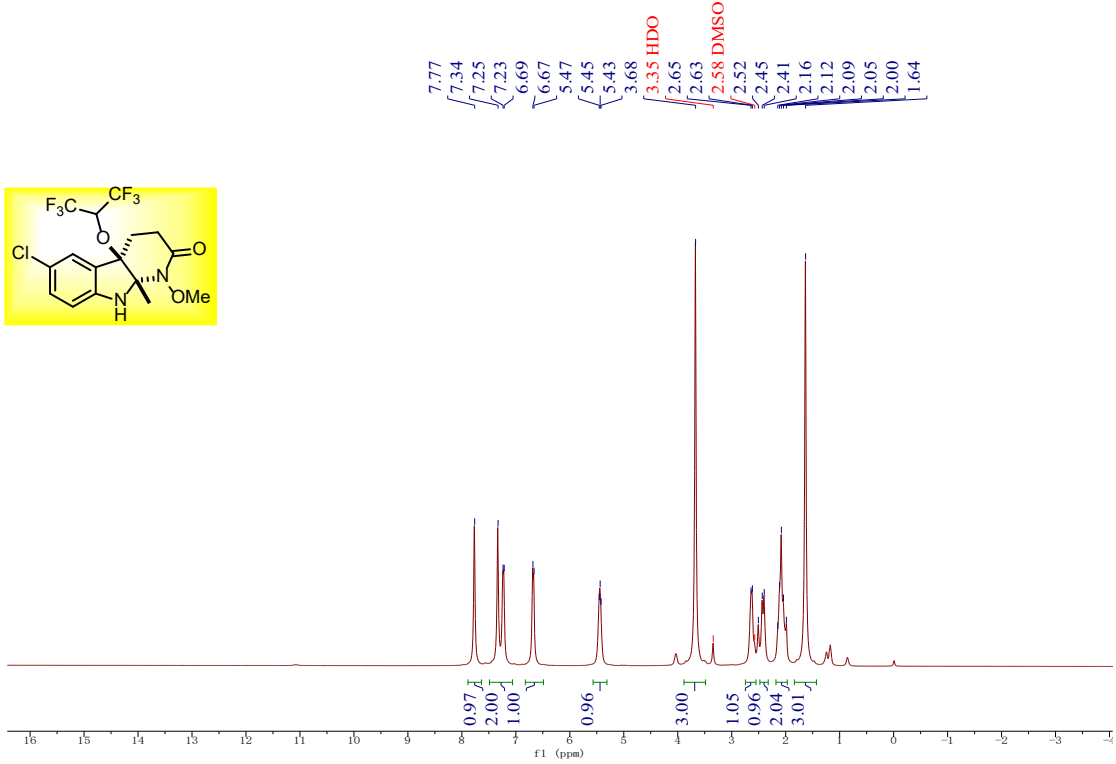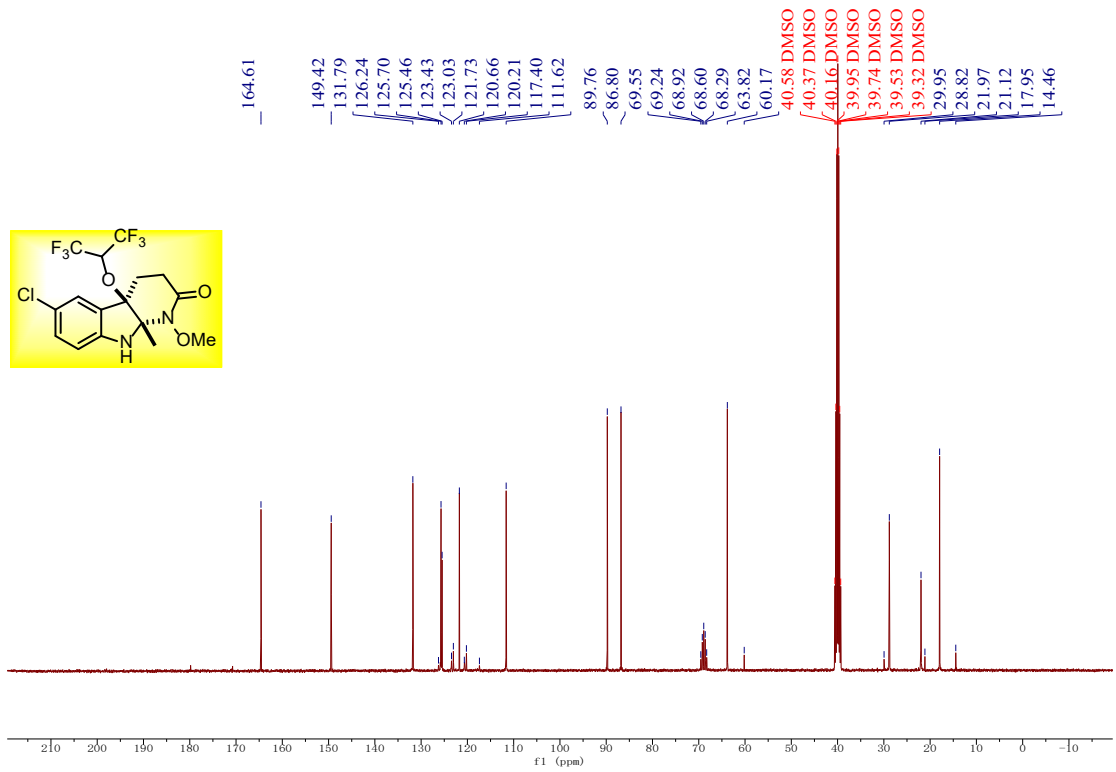

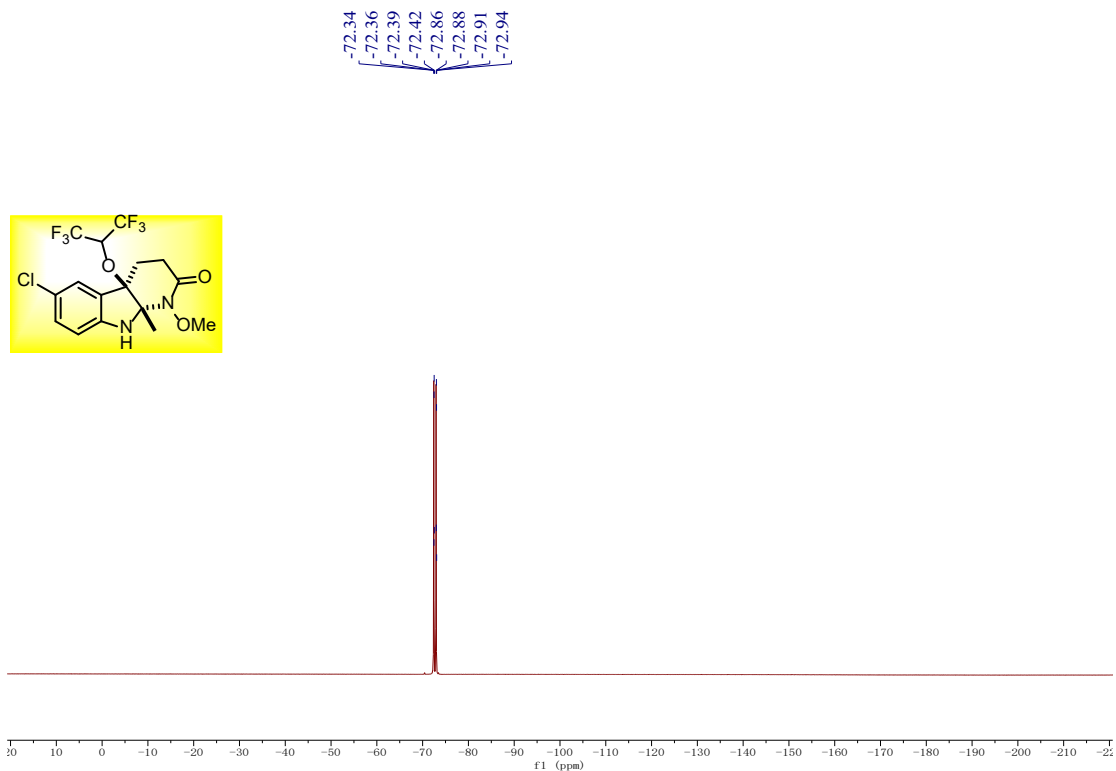

### $^1\text{H}$ NMR, $^{13}\text{C}$ NMR and $^{19}\text{F}$ NMR spectra of 3ag

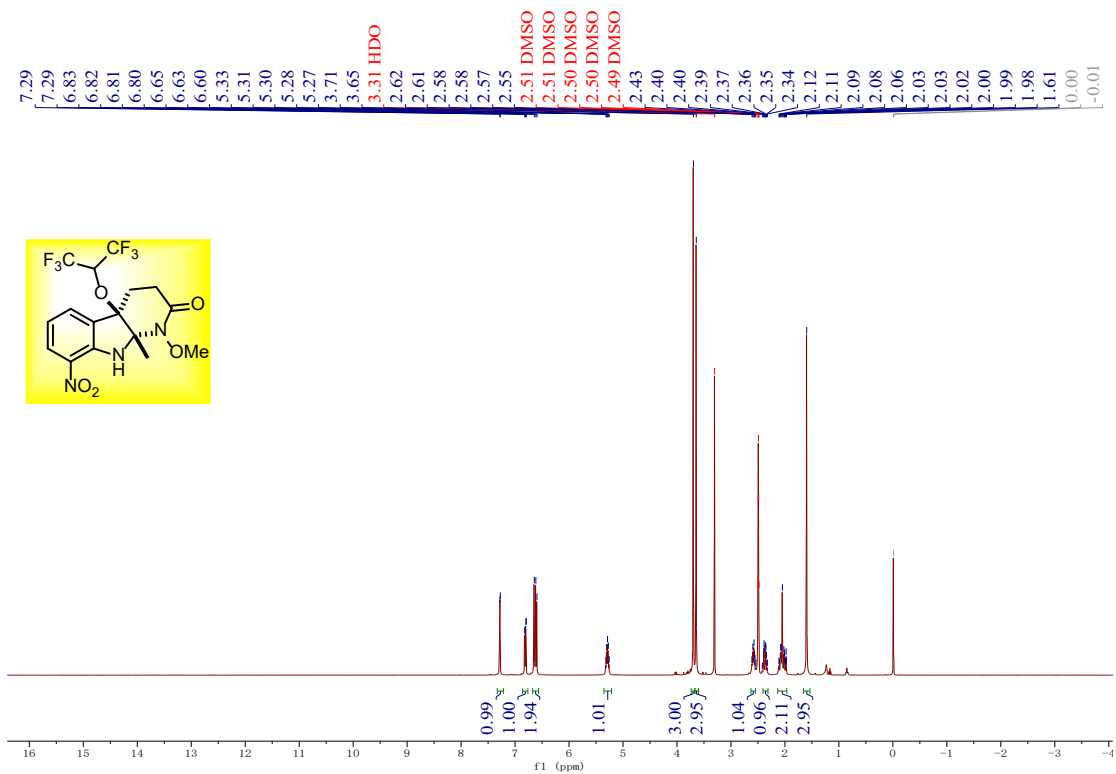

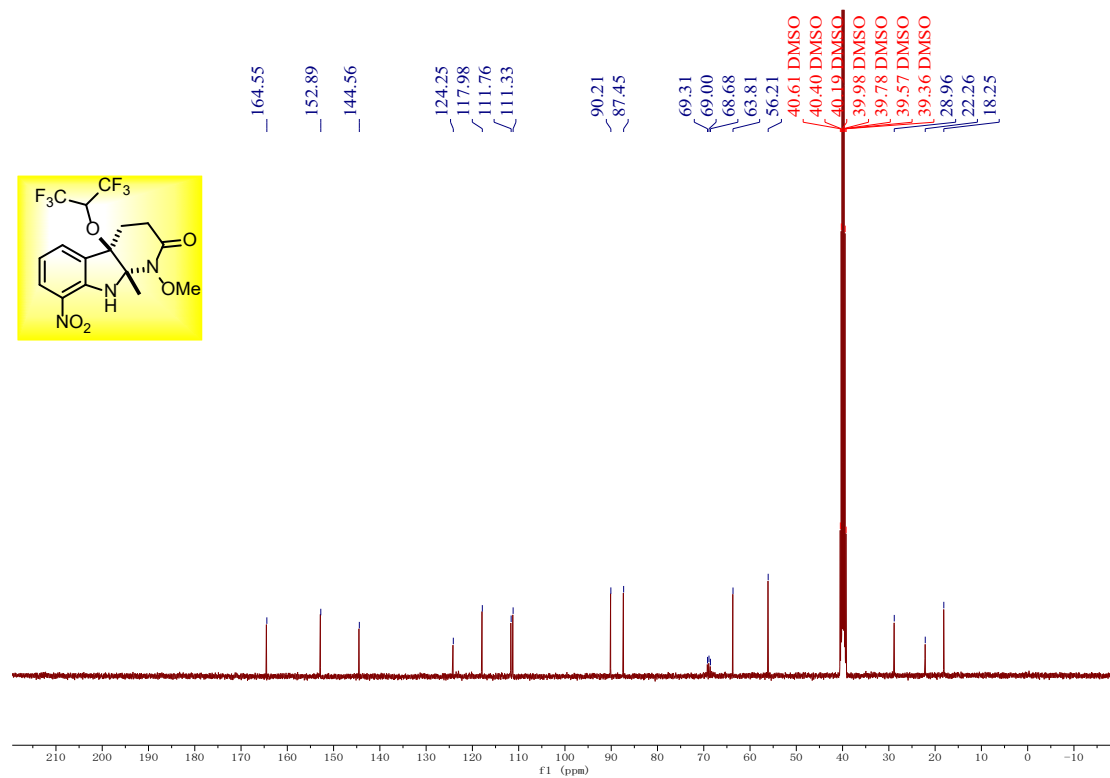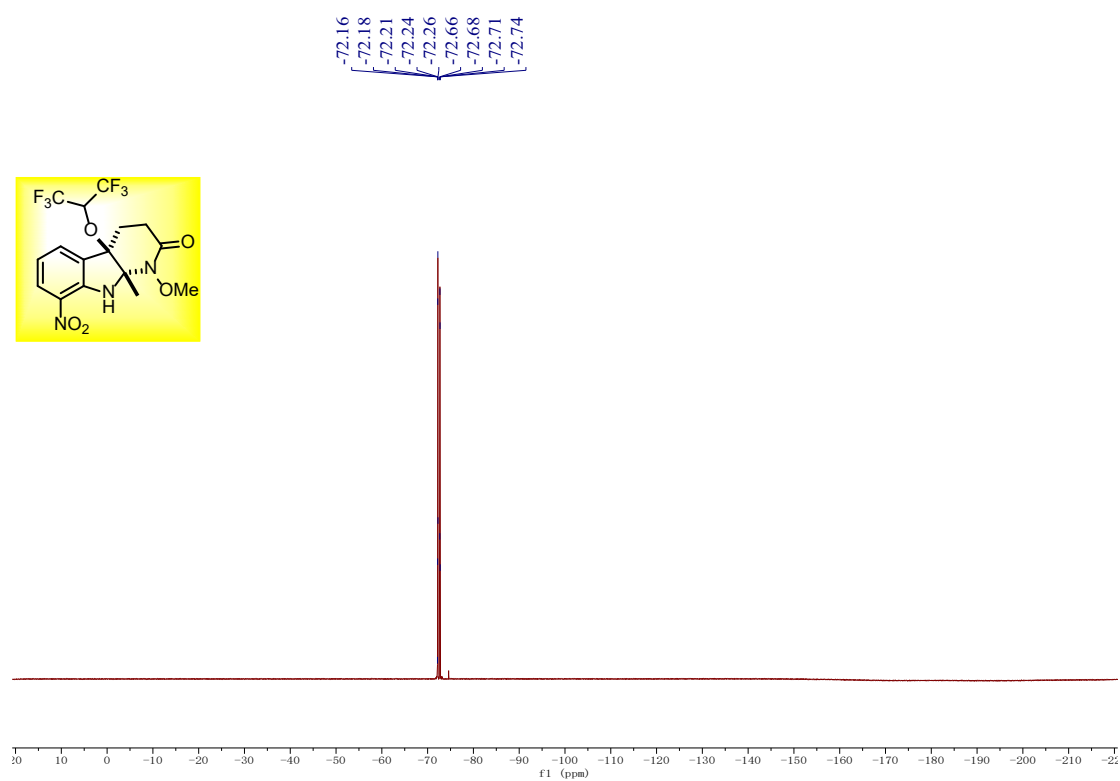

**<sup>1</sup>H NMR, <sup>13</sup>C NMR and <sup>19</sup>F NMR spectra of 3ah**

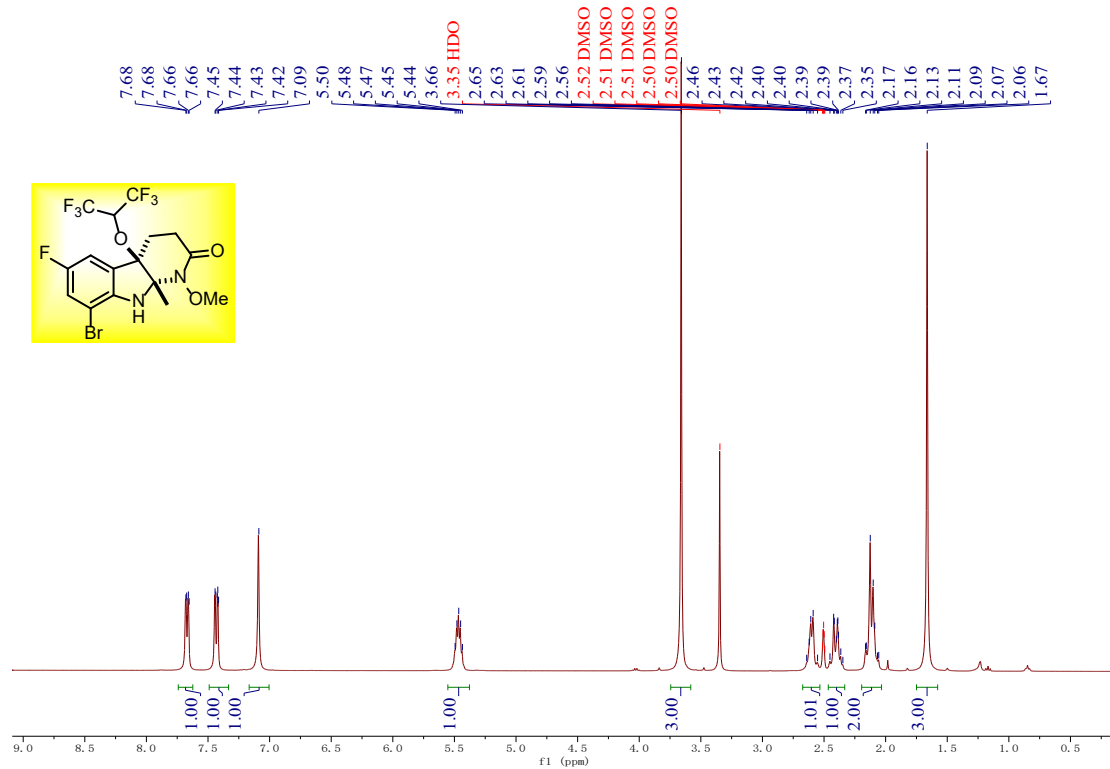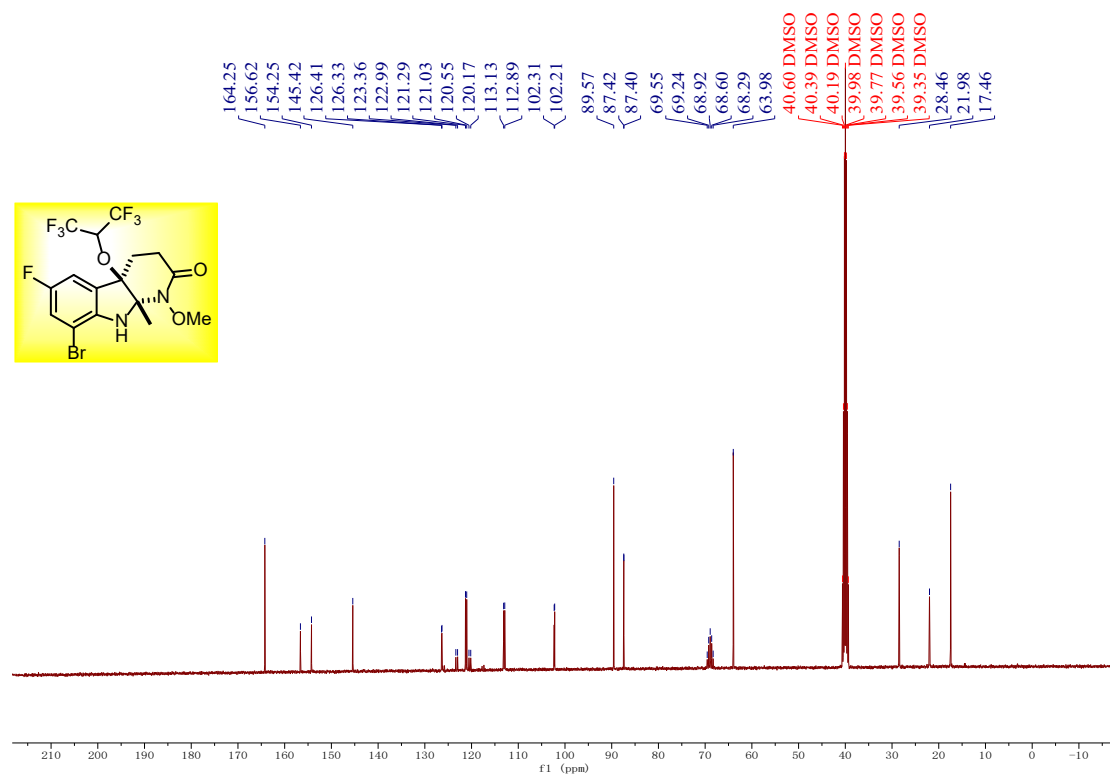

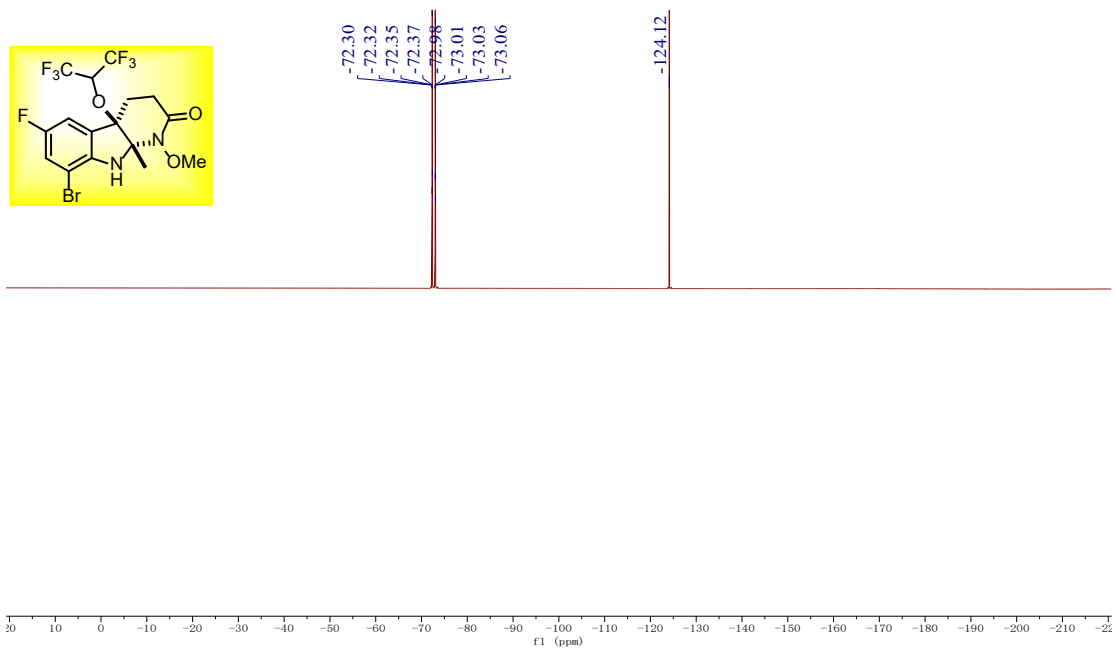

### <sup>1</sup>H NMR, <sup>13</sup>C NMR and <sup>19</sup>F NMR spectra of 3ai

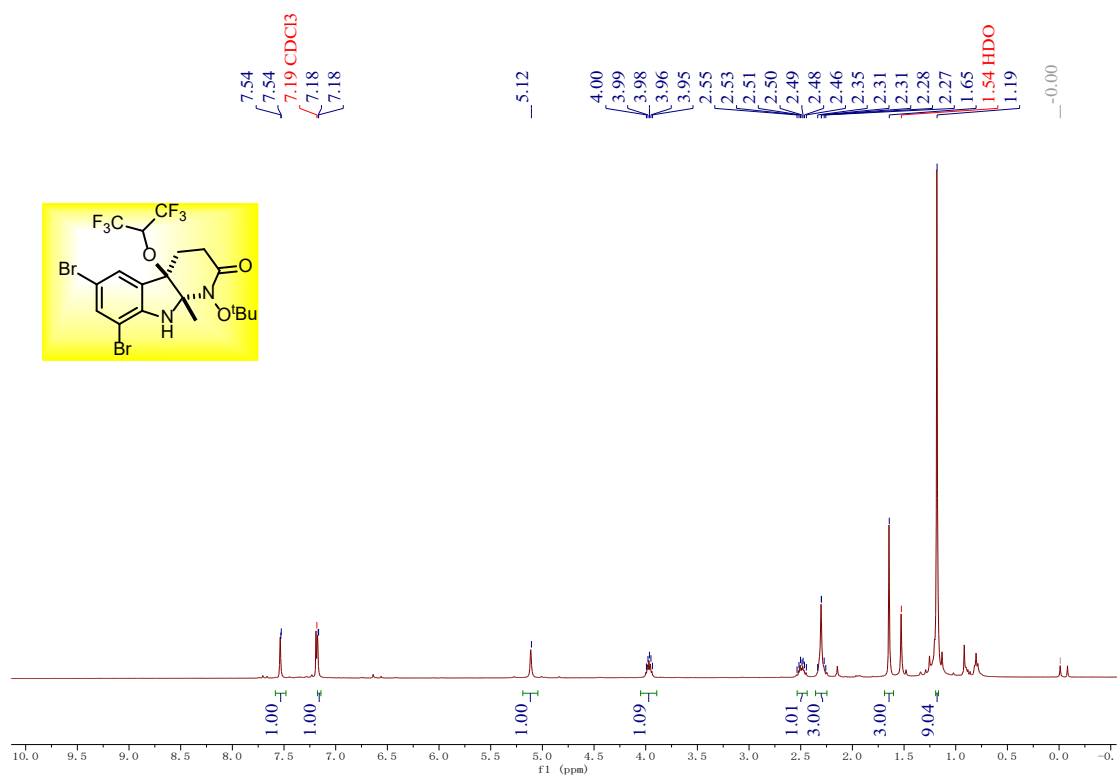



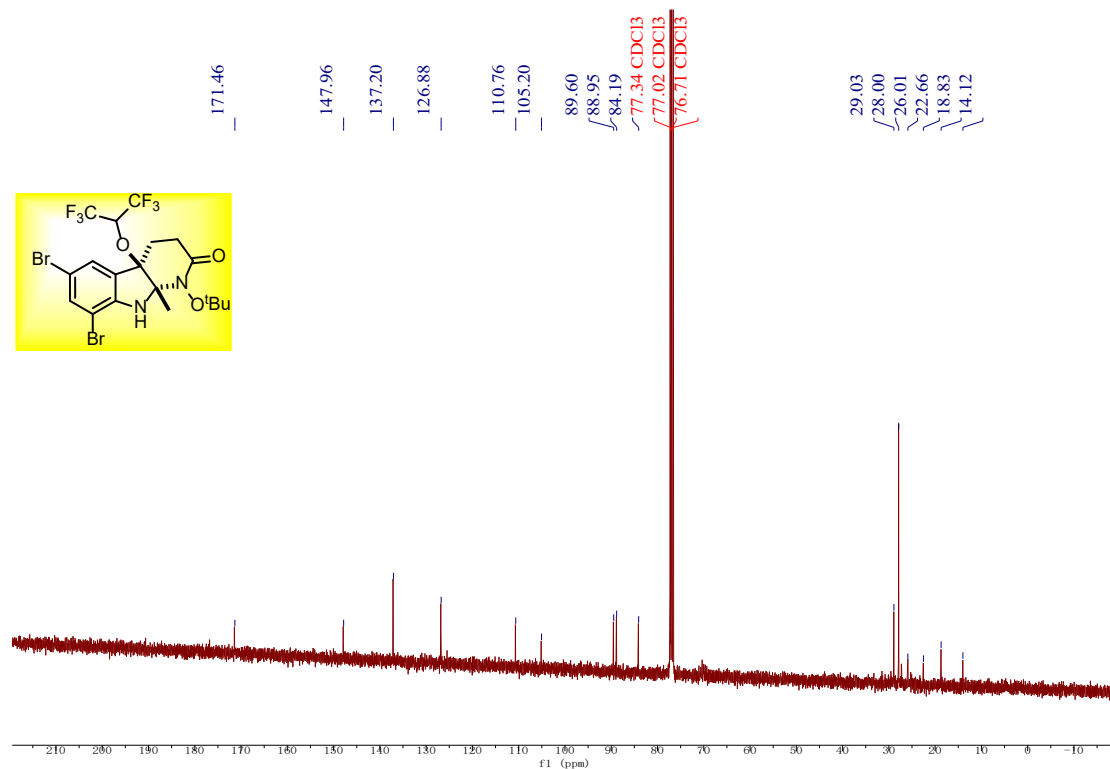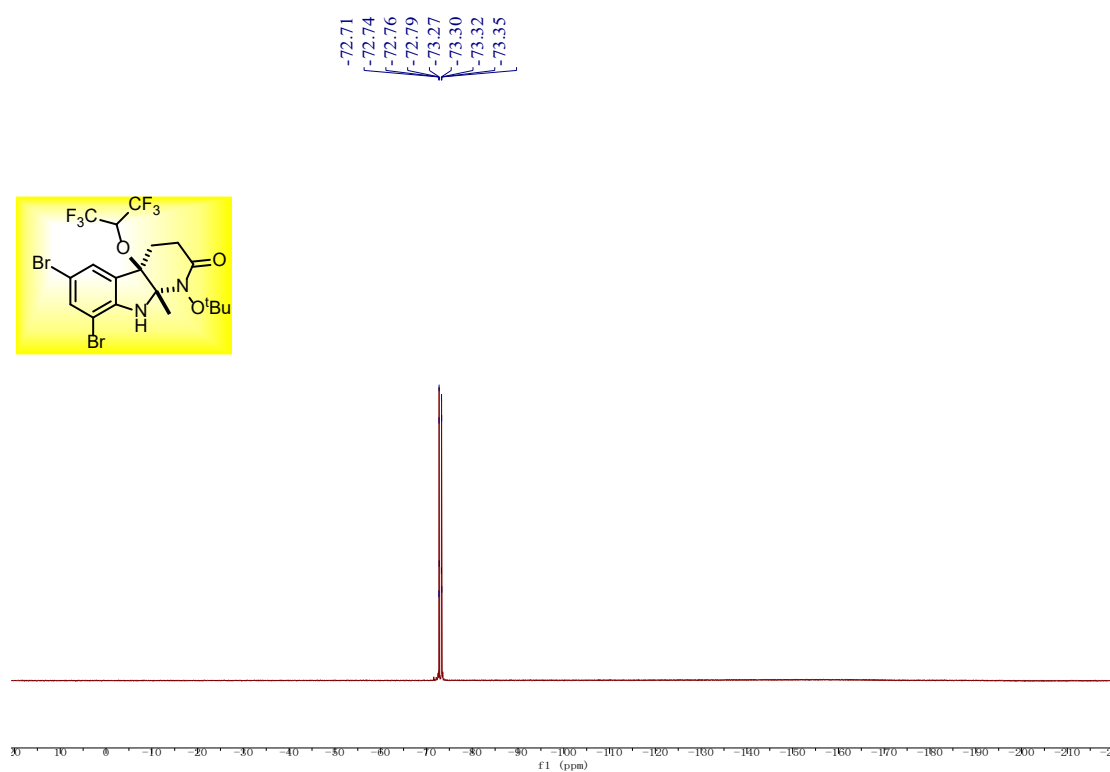

**<sup>1</sup>H NMR, <sup>13</sup>C NMR and <sup>19</sup>F NMR spectra of 3aj**

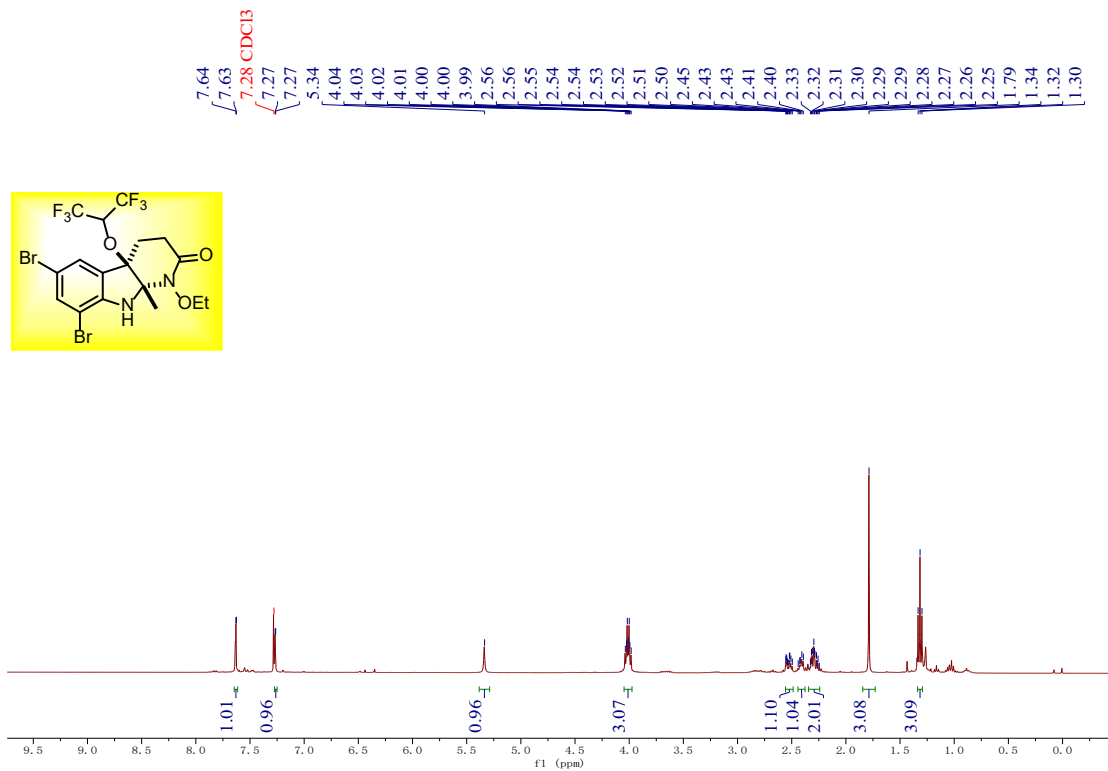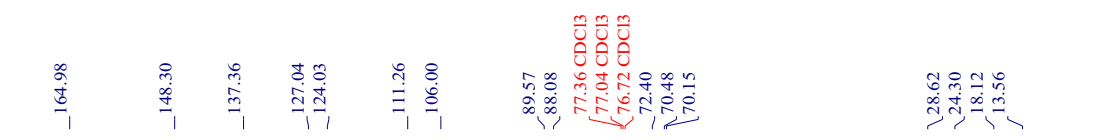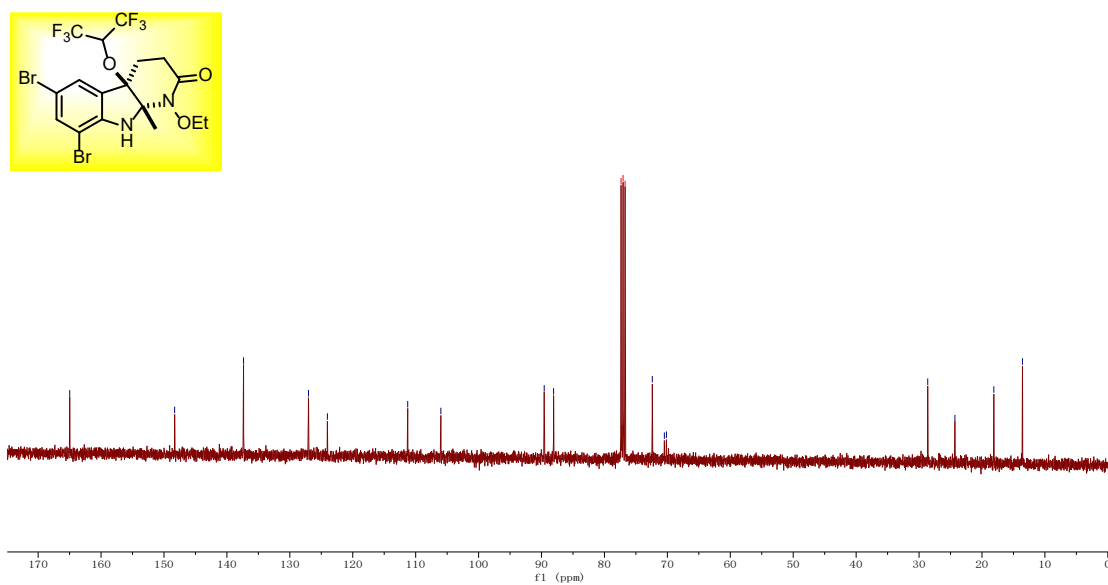

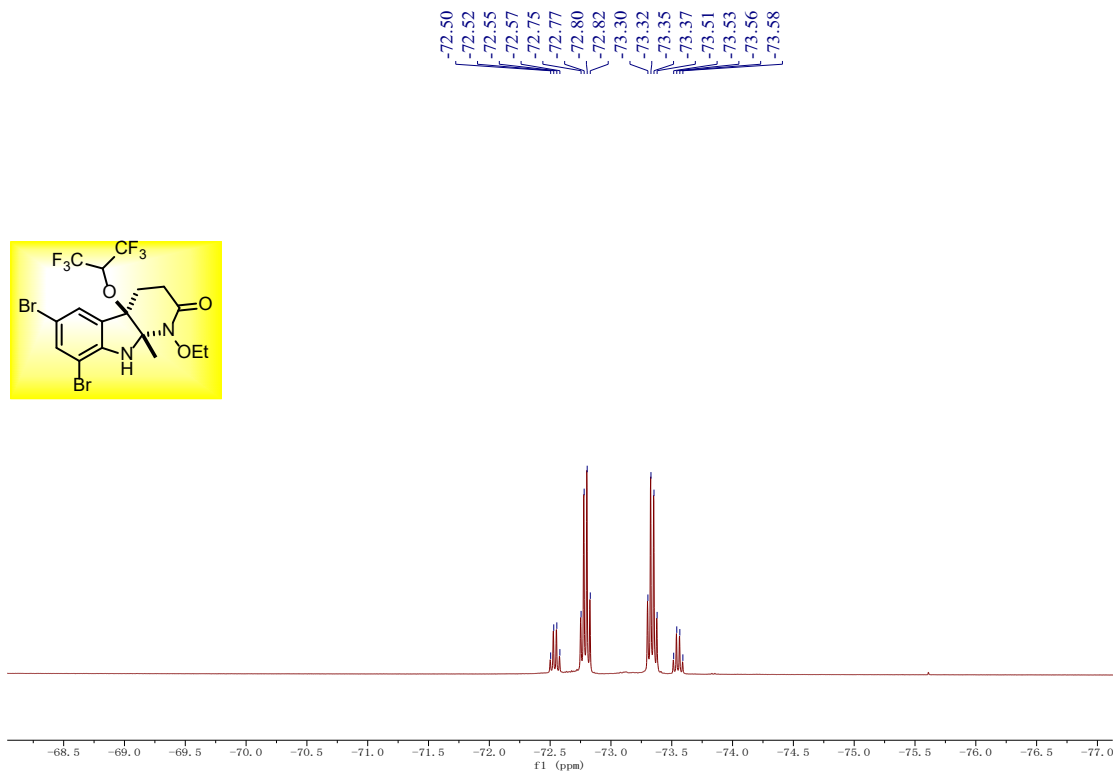

### $^1\text{H}$ NMR $^{13}\text{C}$ NMR spectra of 3am

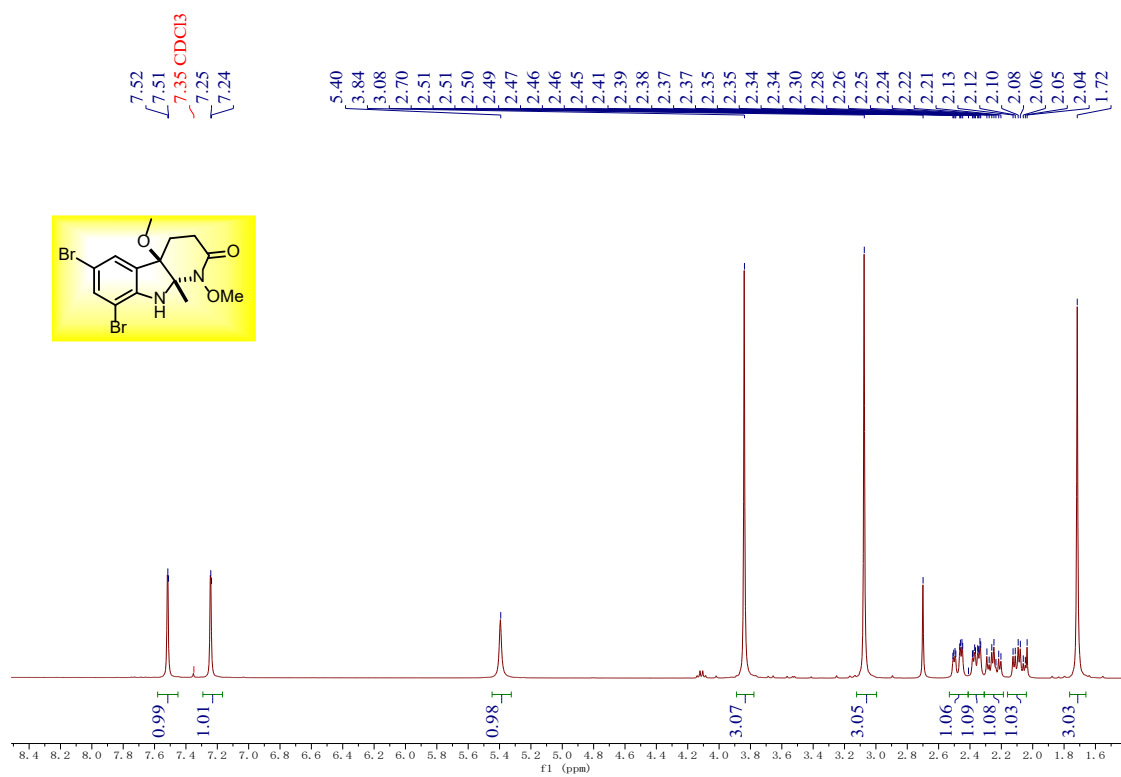

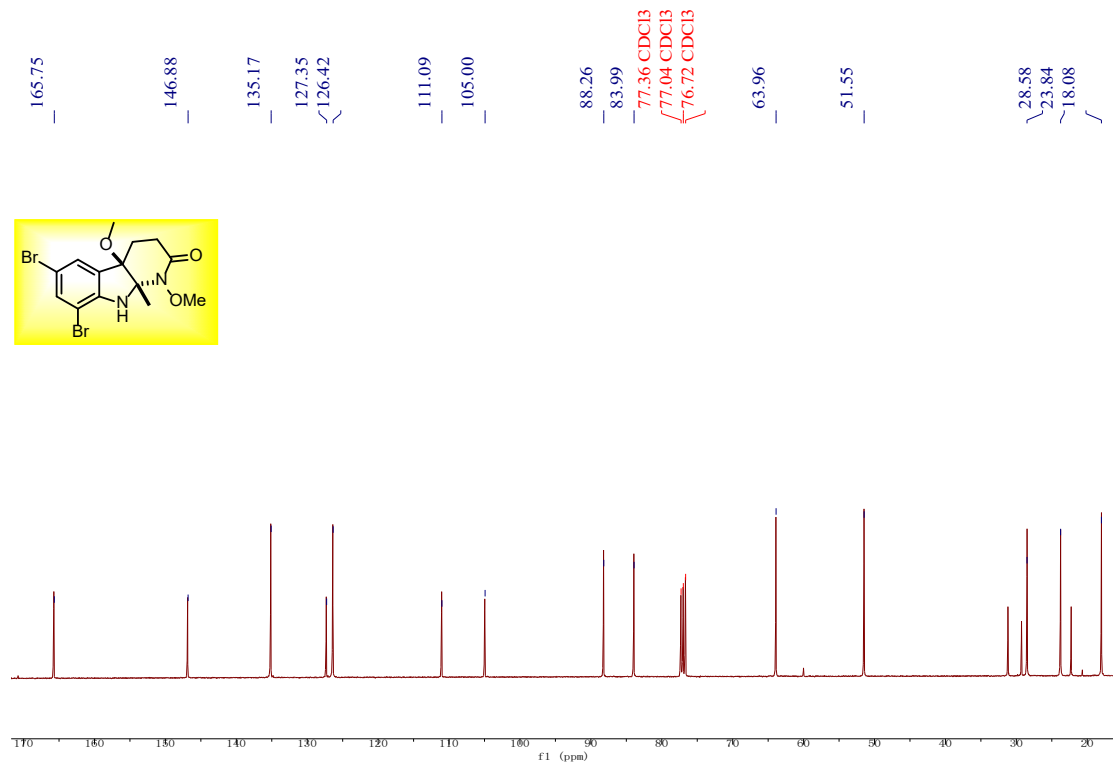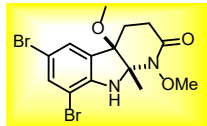

### <sup>1</sup>H NMR <sup>13</sup>C NMR and <sup>19</sup>F NMR spectra of 3ba

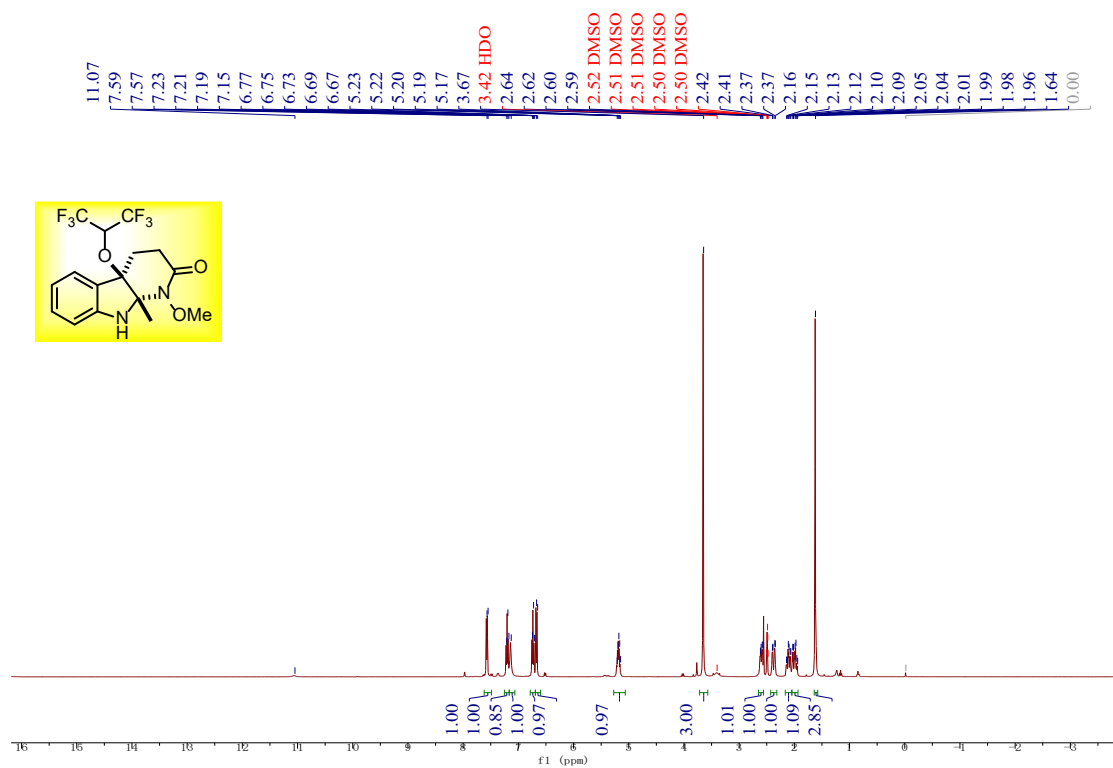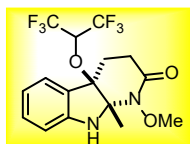

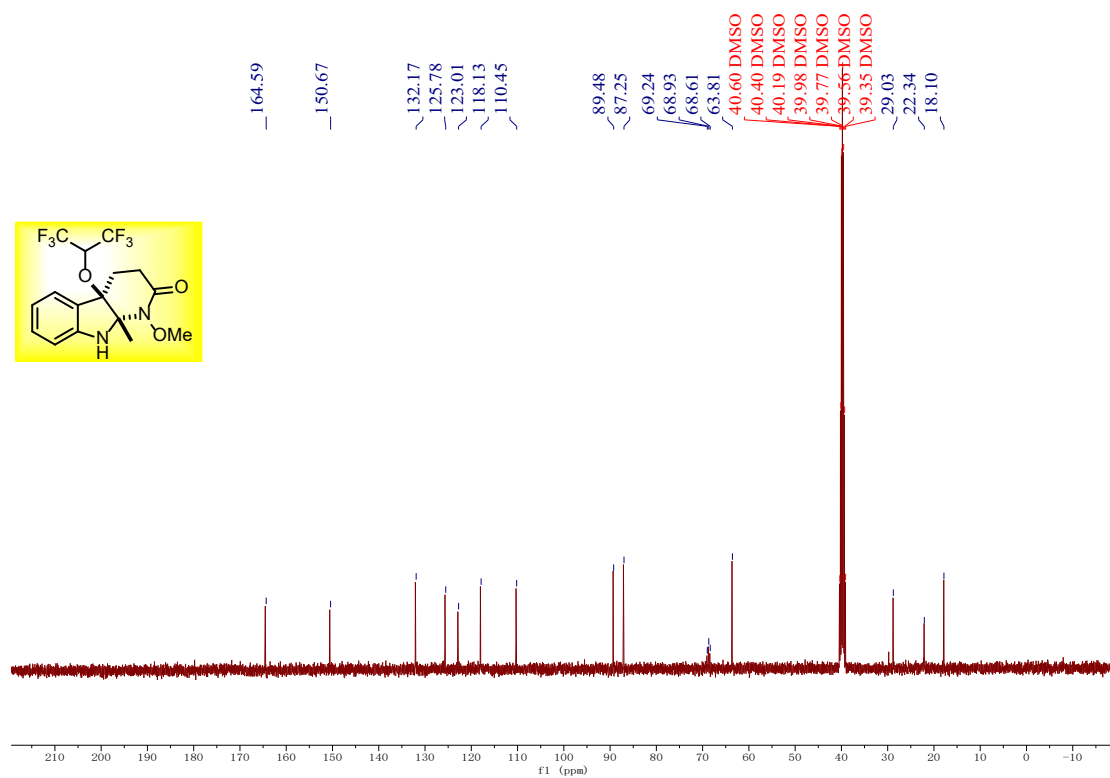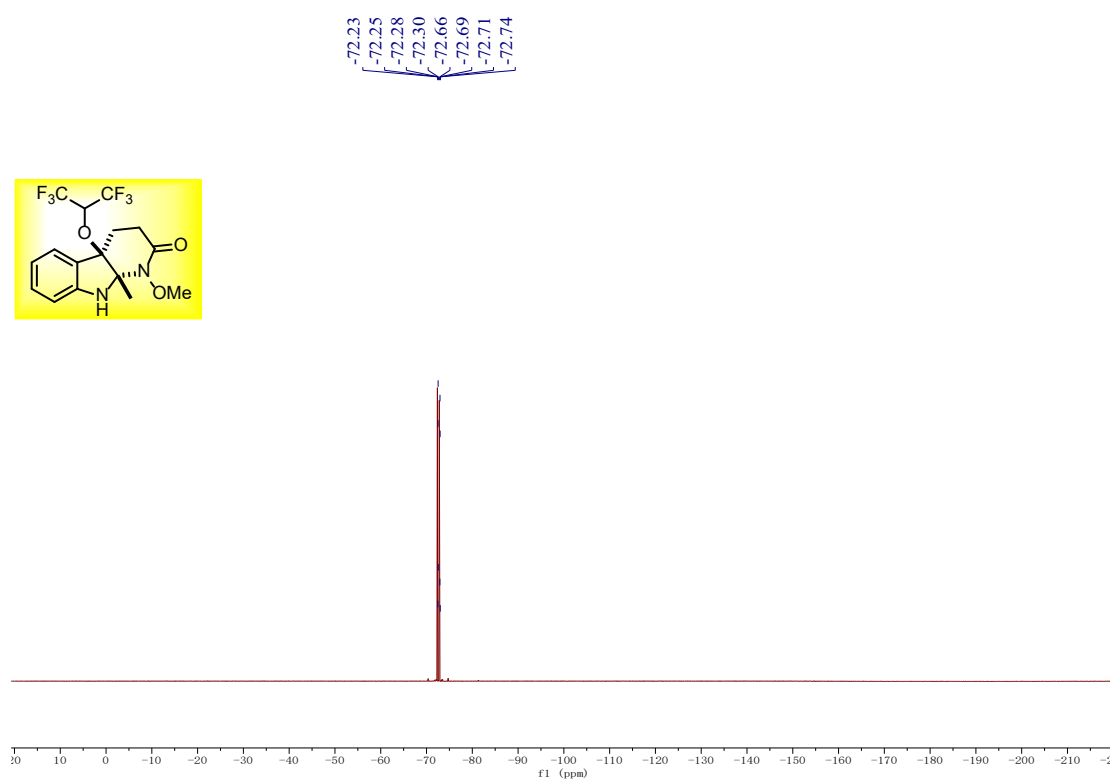

**<sup>1</sup>H NMR <sup>13</sup>C NMR and <sup>19</sup>F NMR spectra of 3bb**

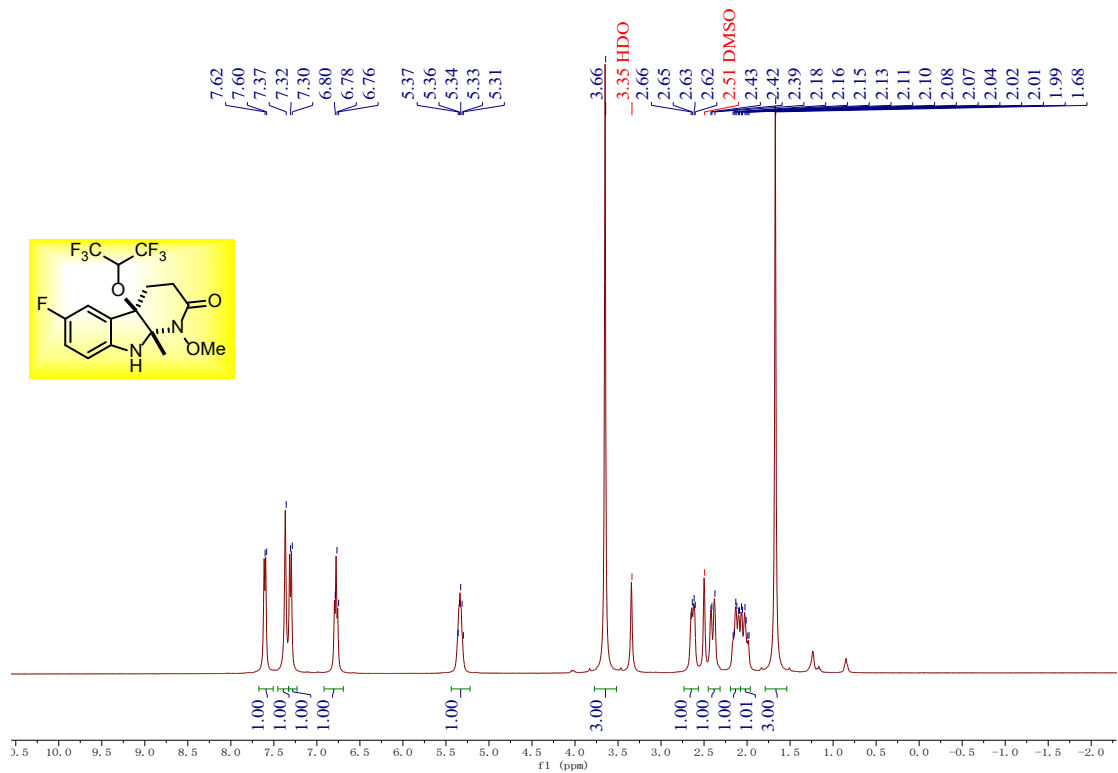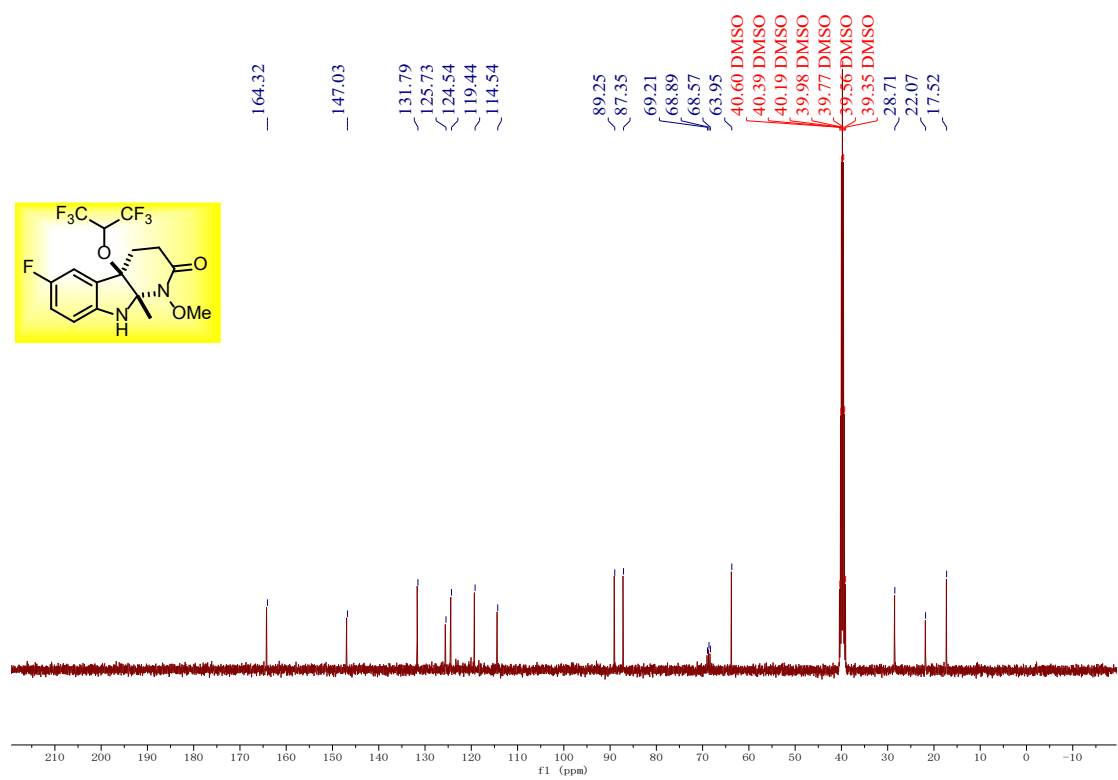

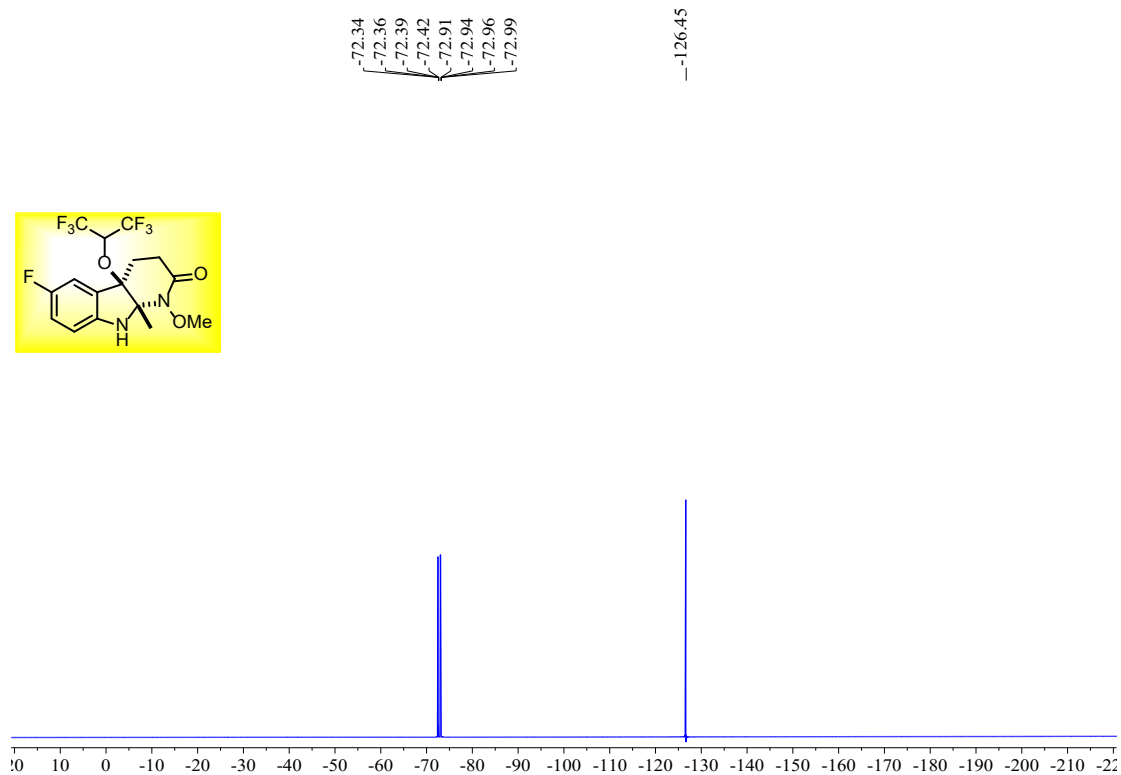

### $^1\text{H}$ NMR $^{13}\text{C}$ NMR and $^{19}\text{F}$ NMR spectra of 3bc

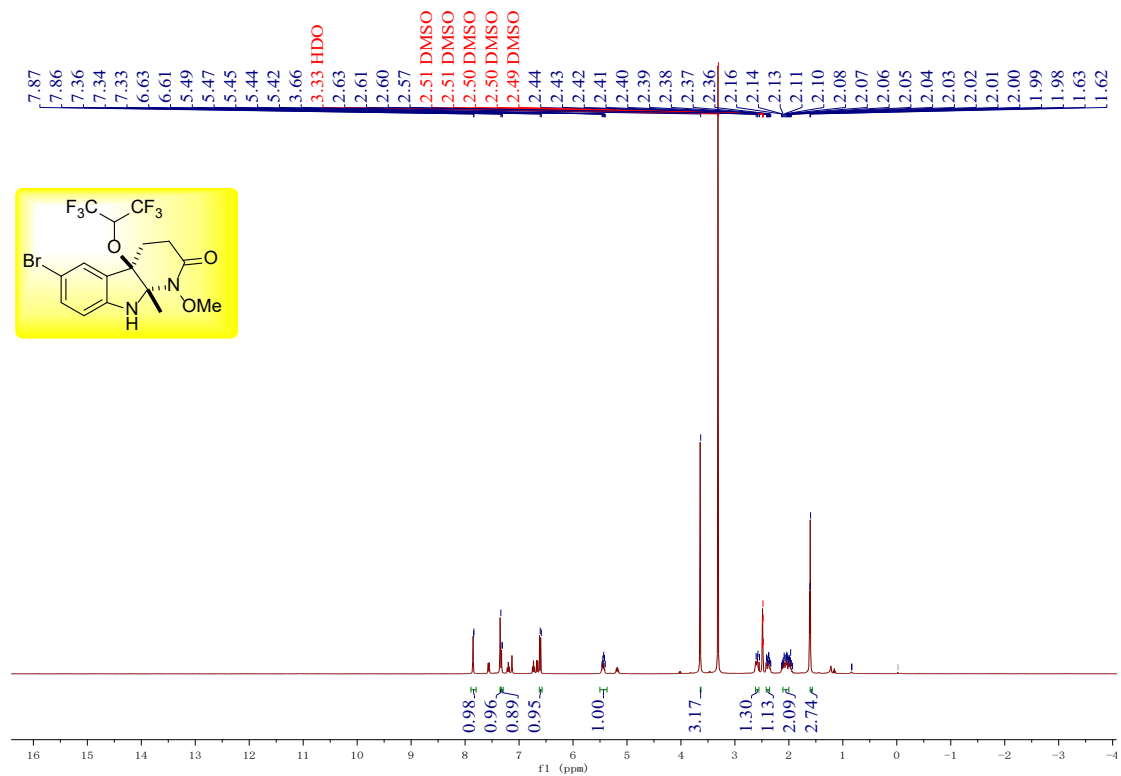

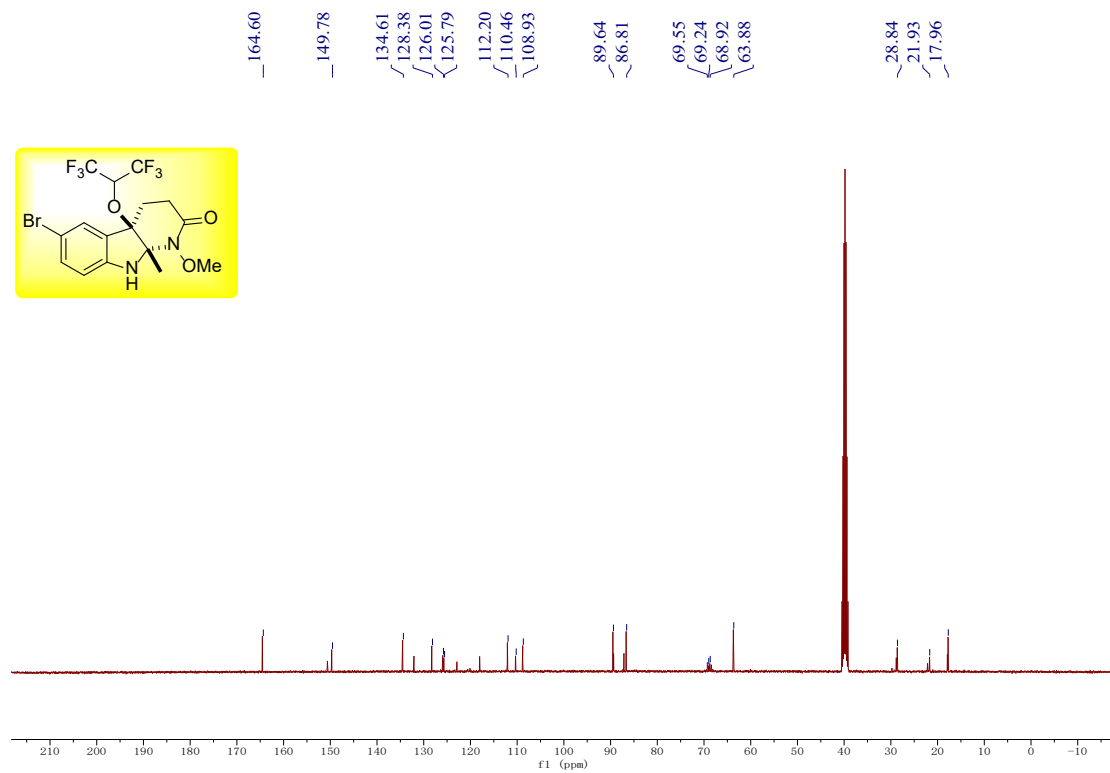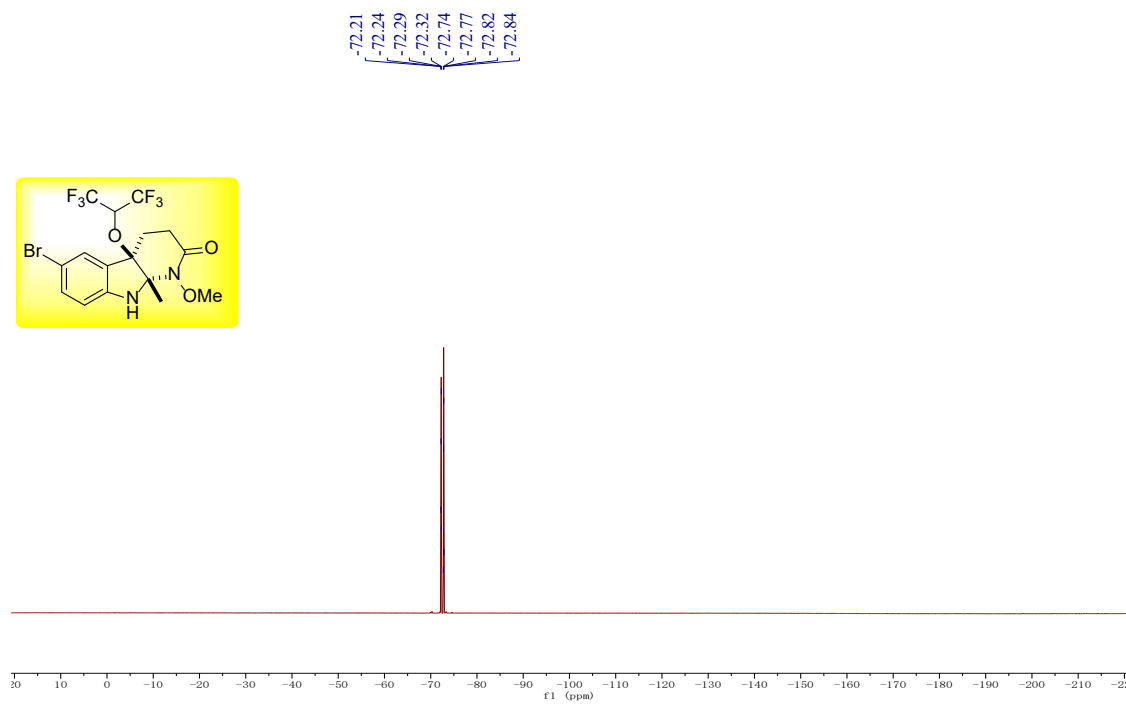

**<sup>1</sup>H NMR <sup>13</sup>C NMR and <sup>19</sup>F NMR spectra of 3bd**



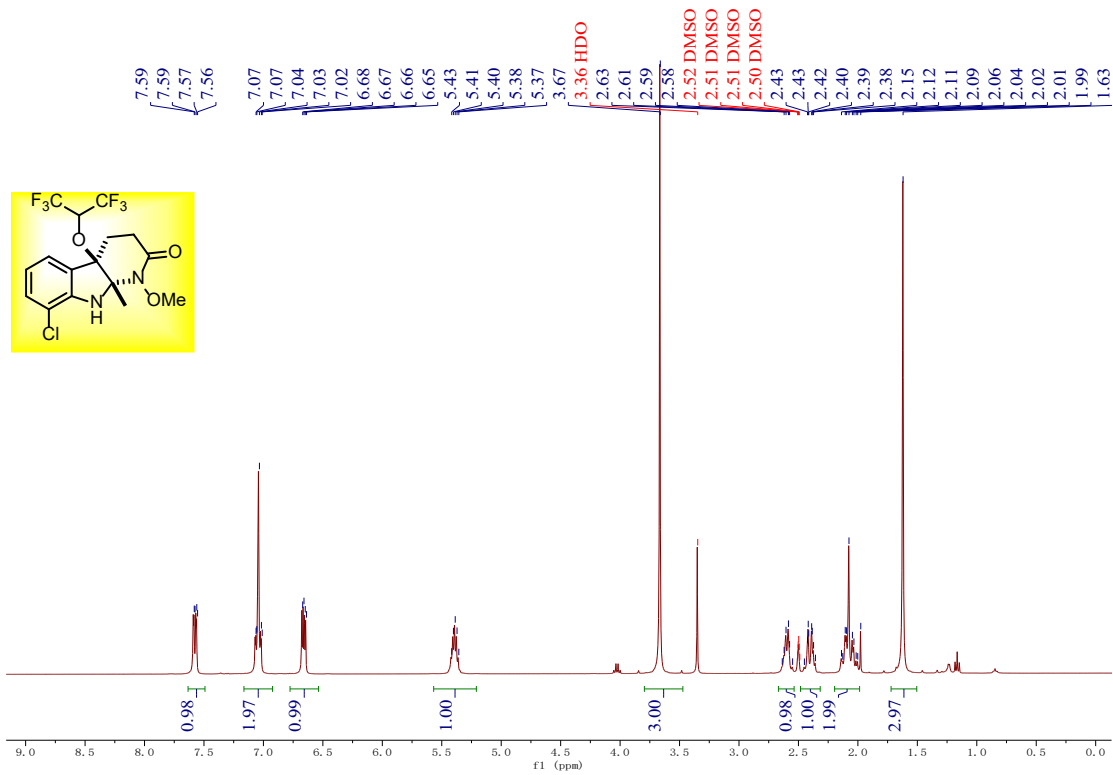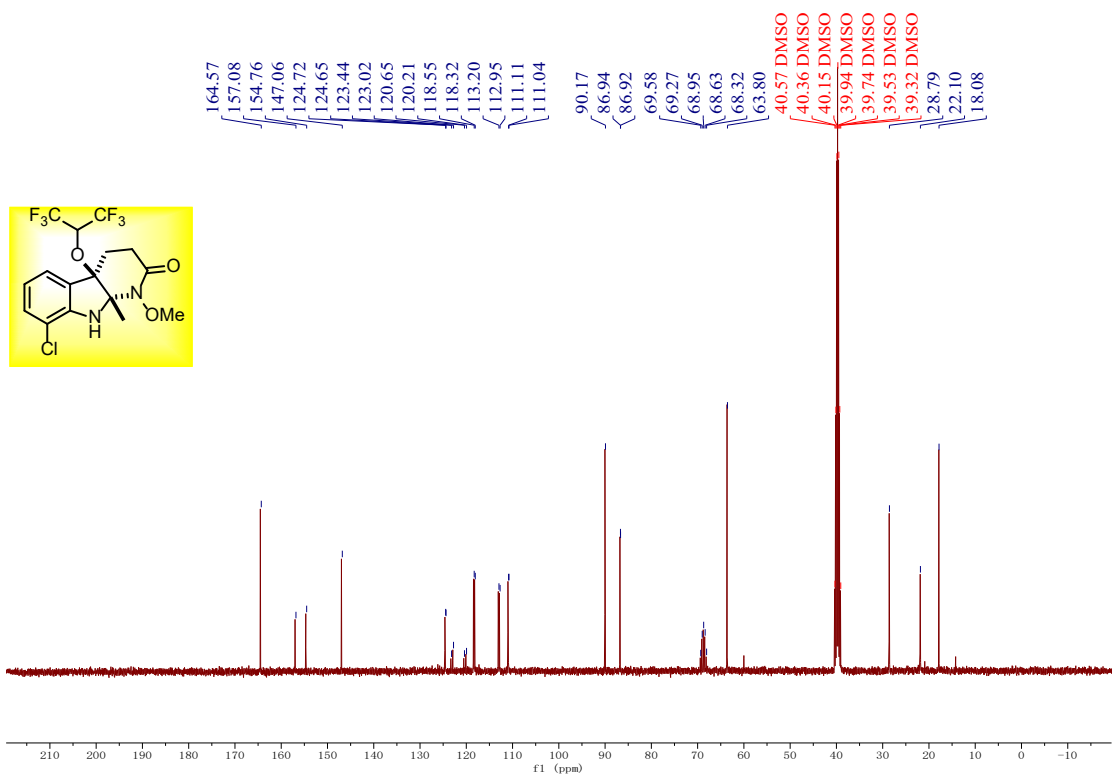

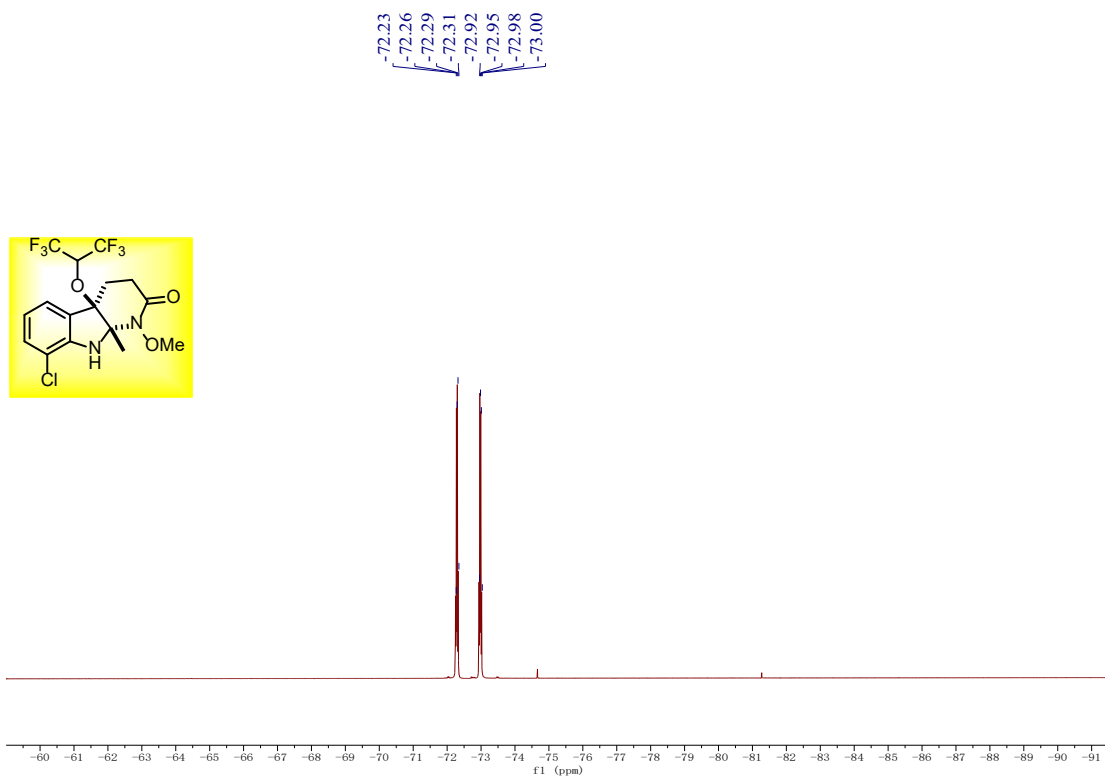

### <sup>1</sup>H NMR <sup>13</sup>C NMR and <sup>19</sup>F NMR spectra of 3be

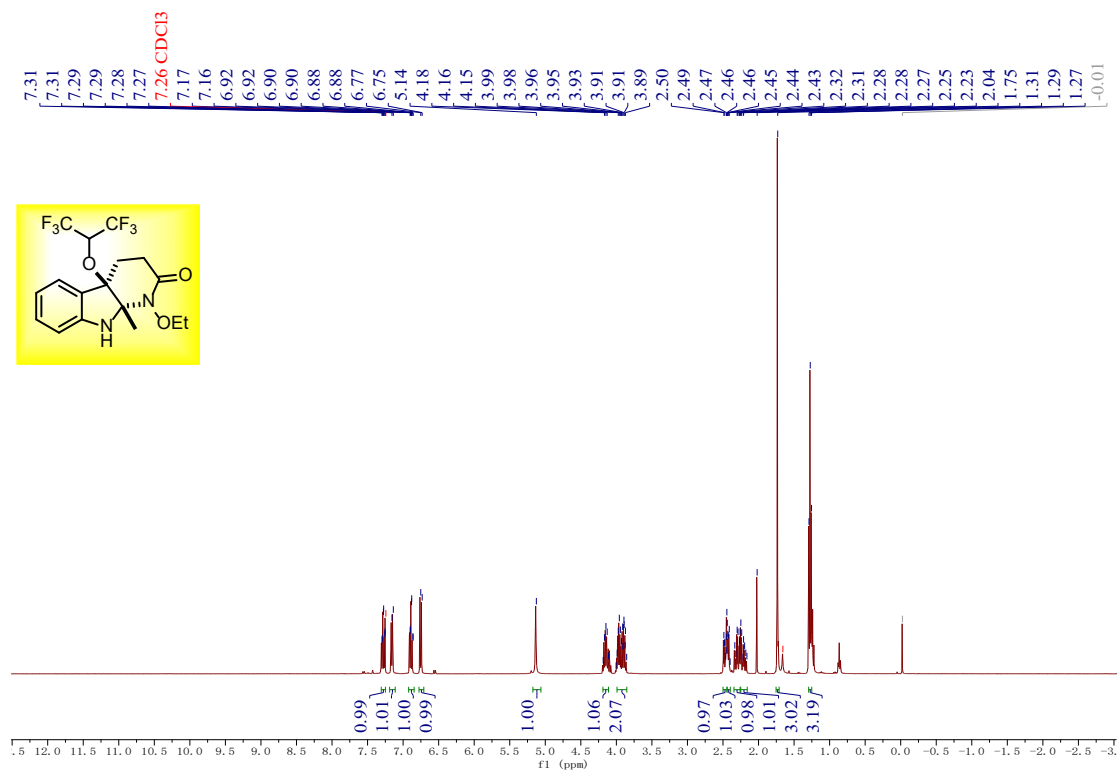

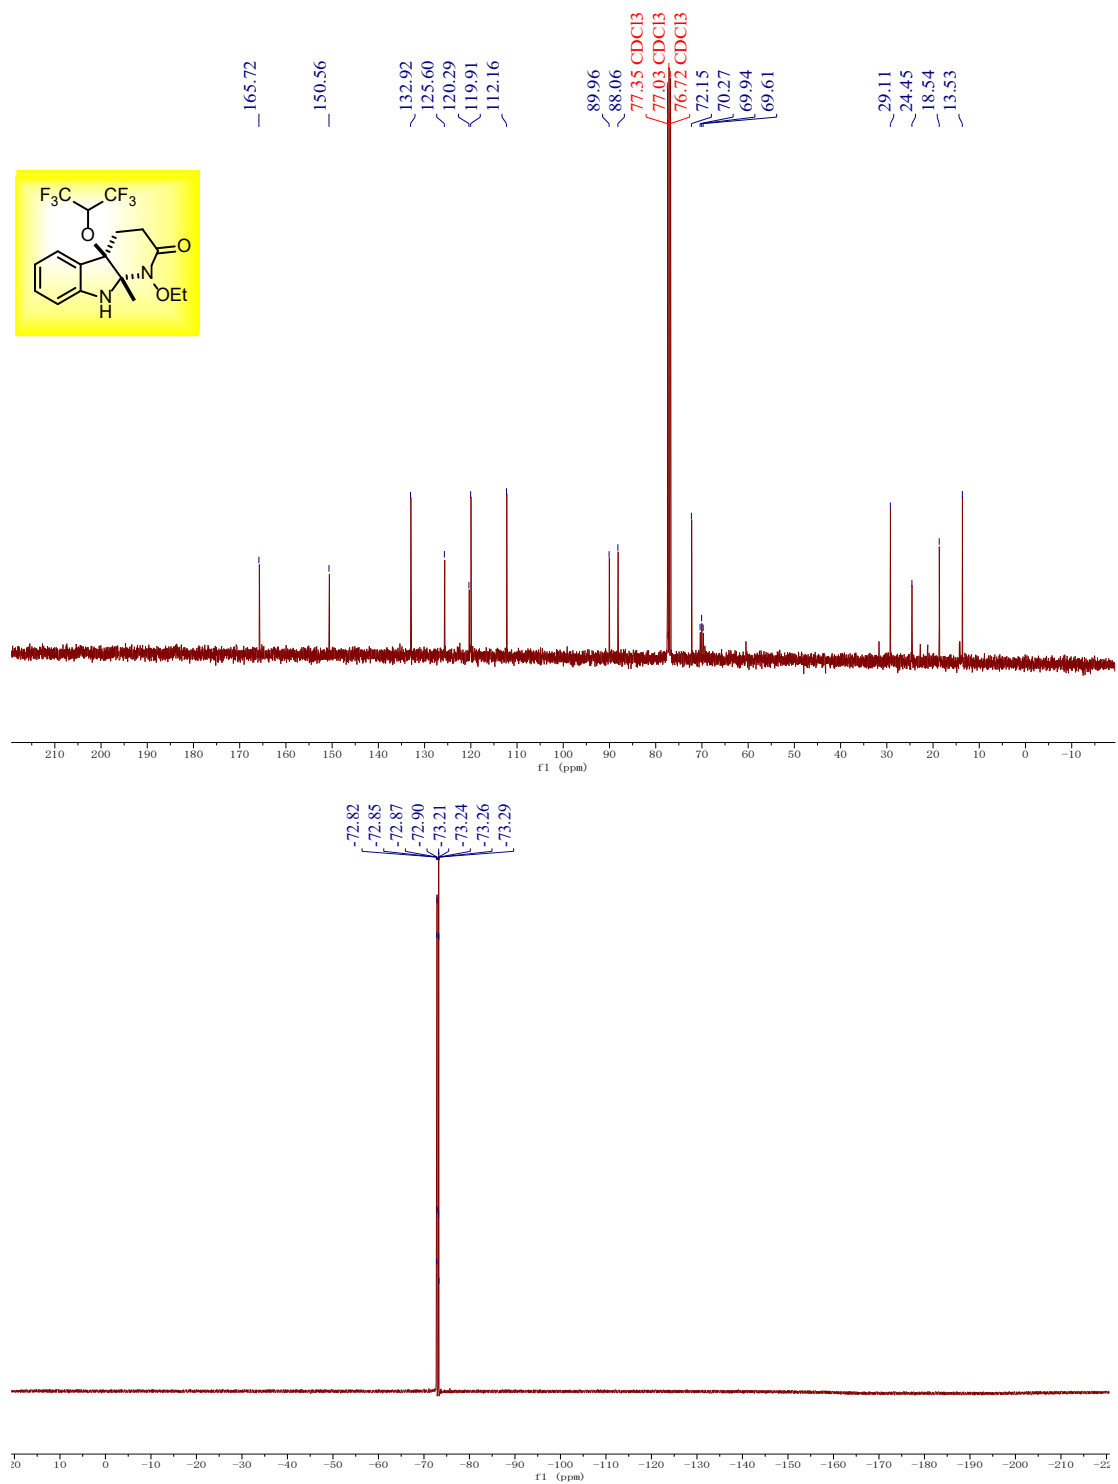

**<sup>1</sup>H NMR and <sup>13</sup>C NMR spectra of 4aa**

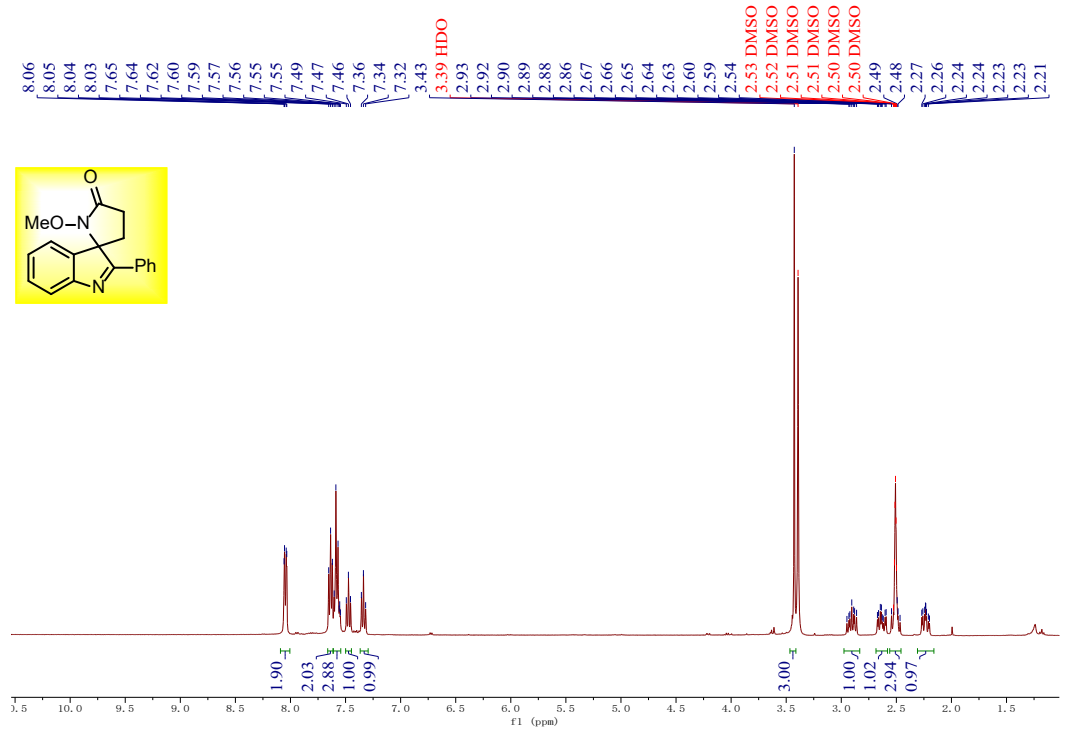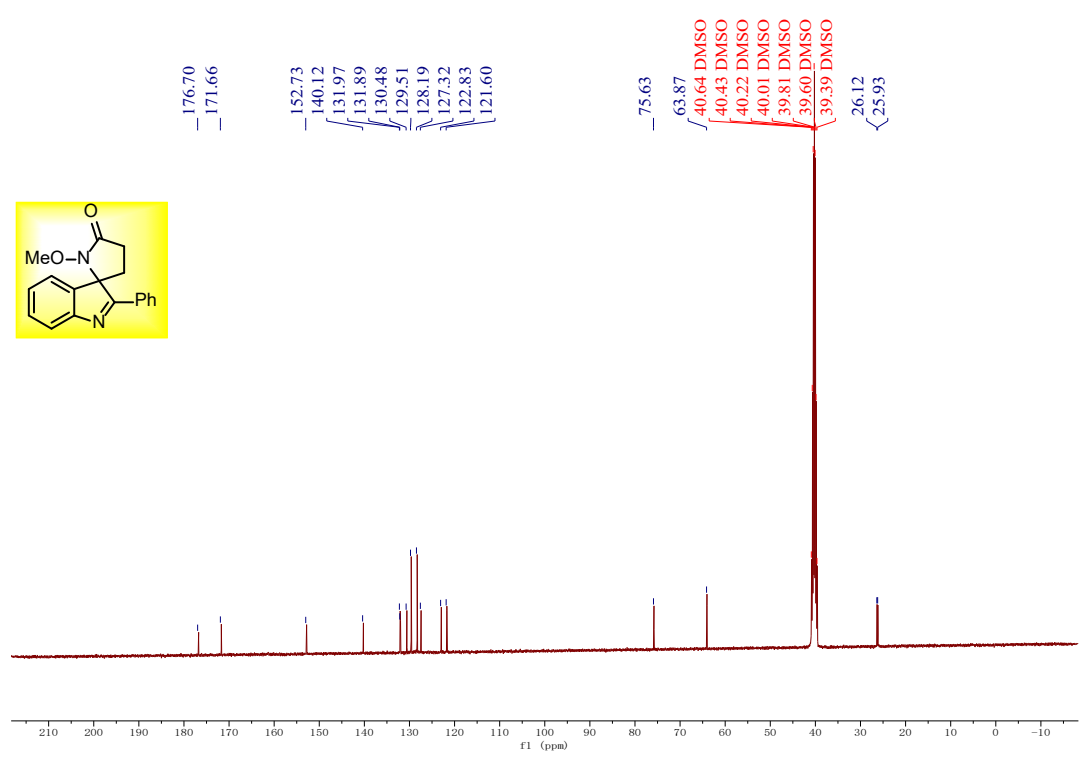

**<sup>1</sup>H NMR and <sup>13</sup>C NMR spectra of 4ab**

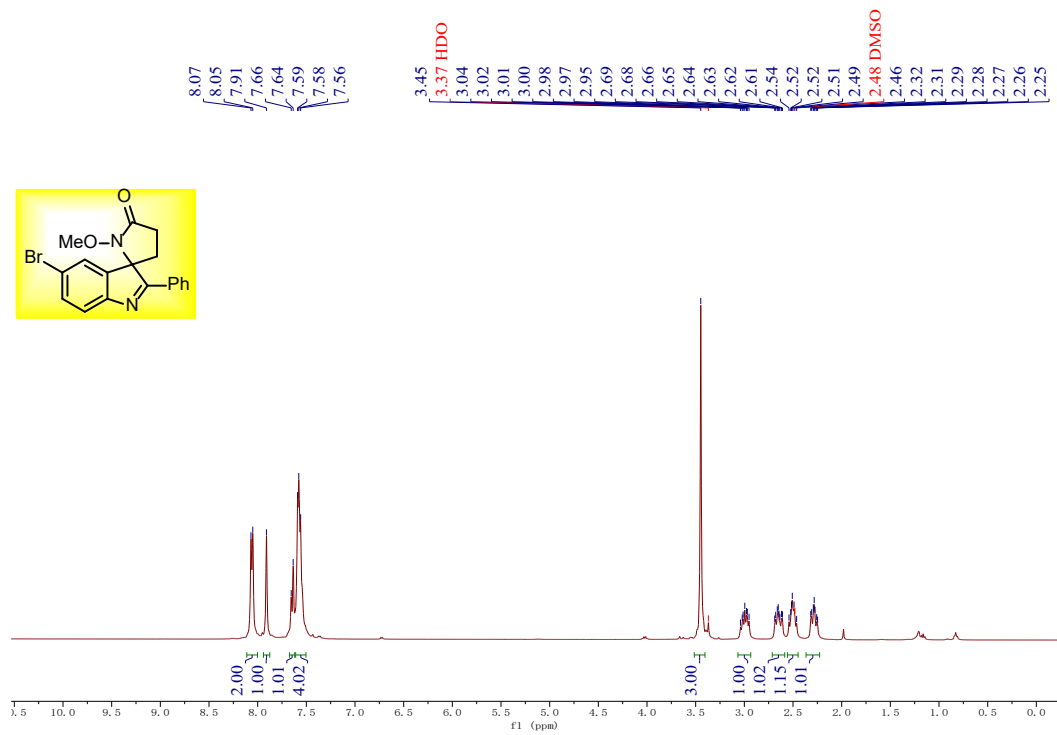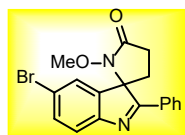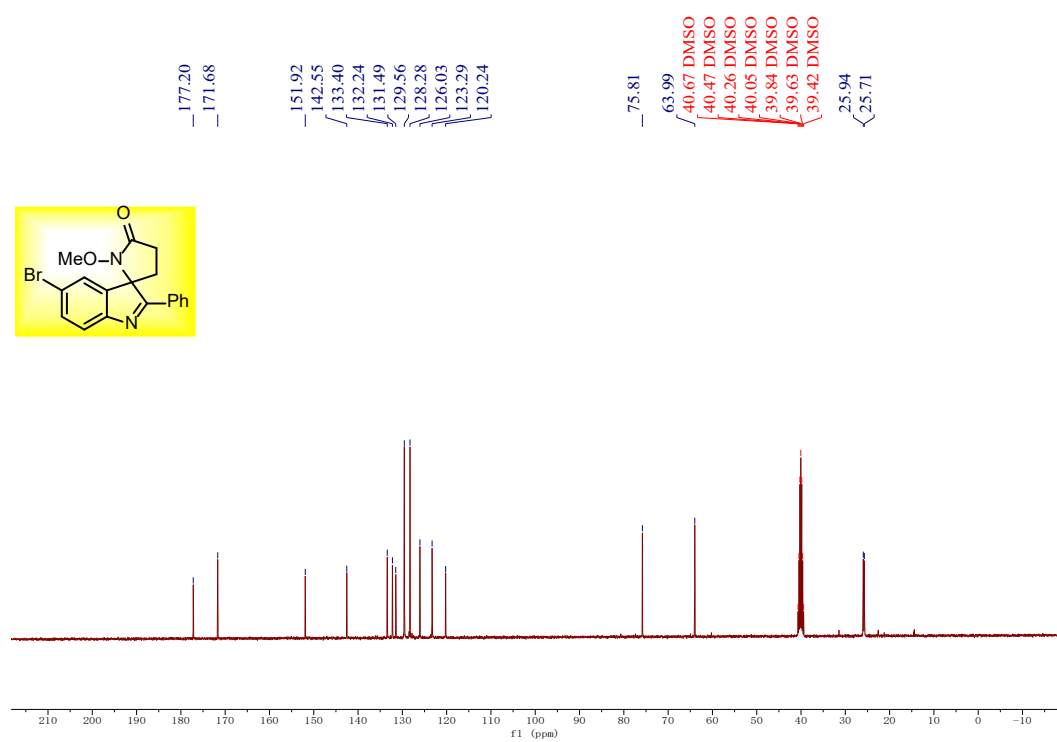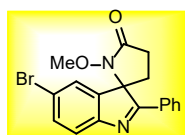

**<sup>1</sup>H NMR and <sup>13</sup>C NMR spectra of 4ac**

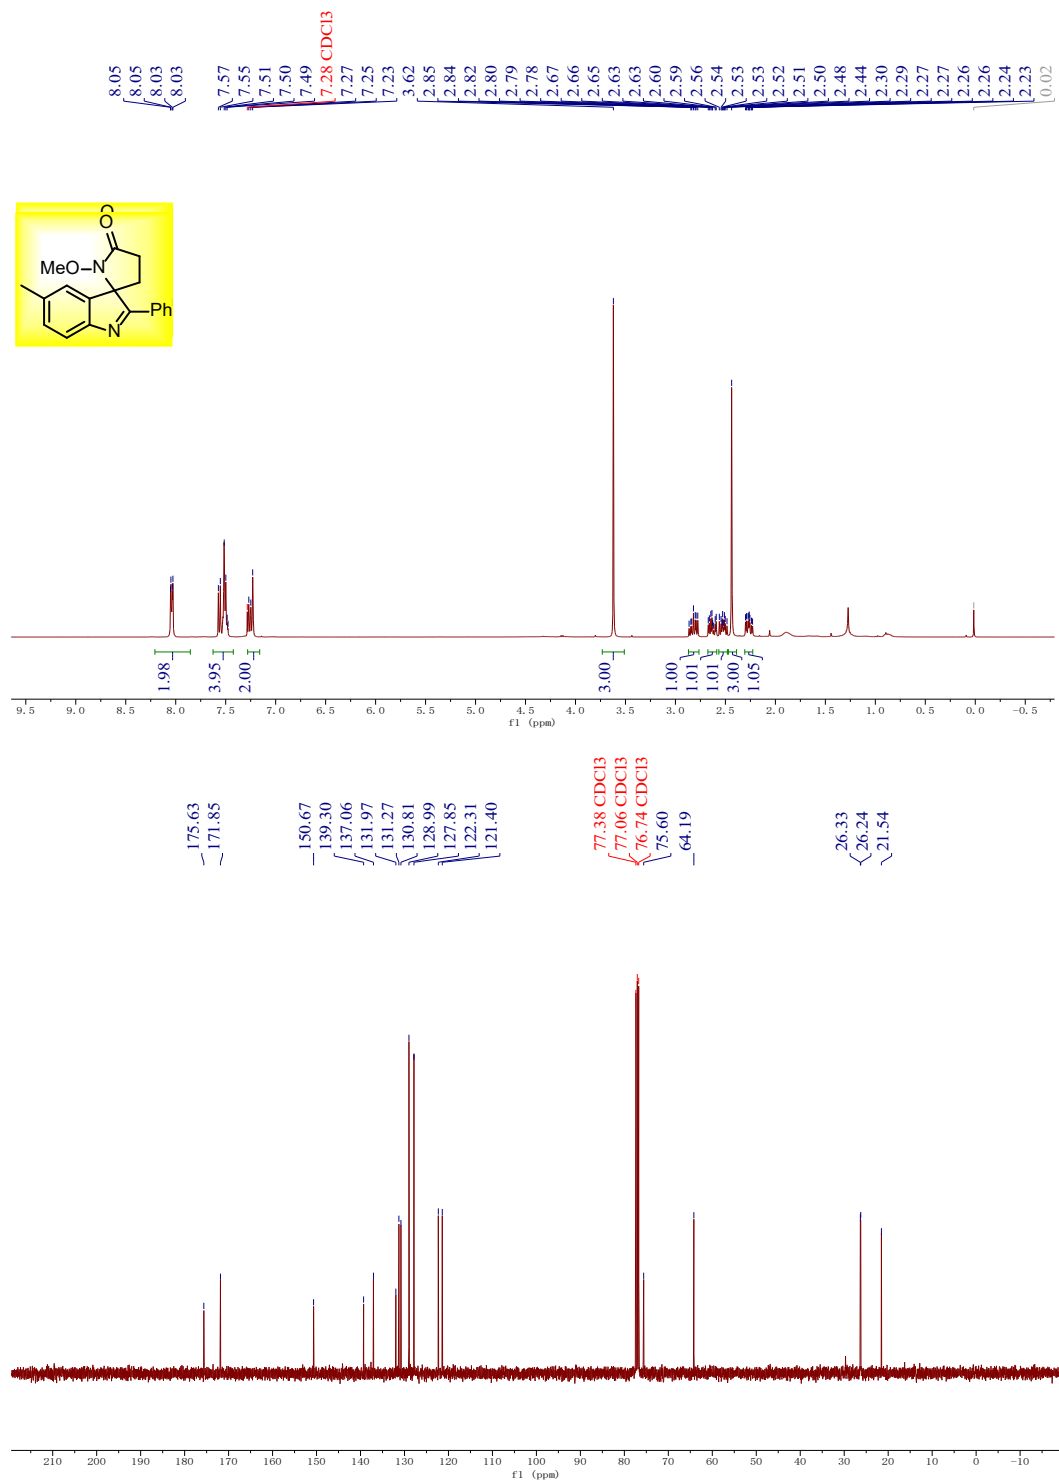

**<sup>1</sup>H NMR and <sup>13</sup>C NMR spectra of 4ad**

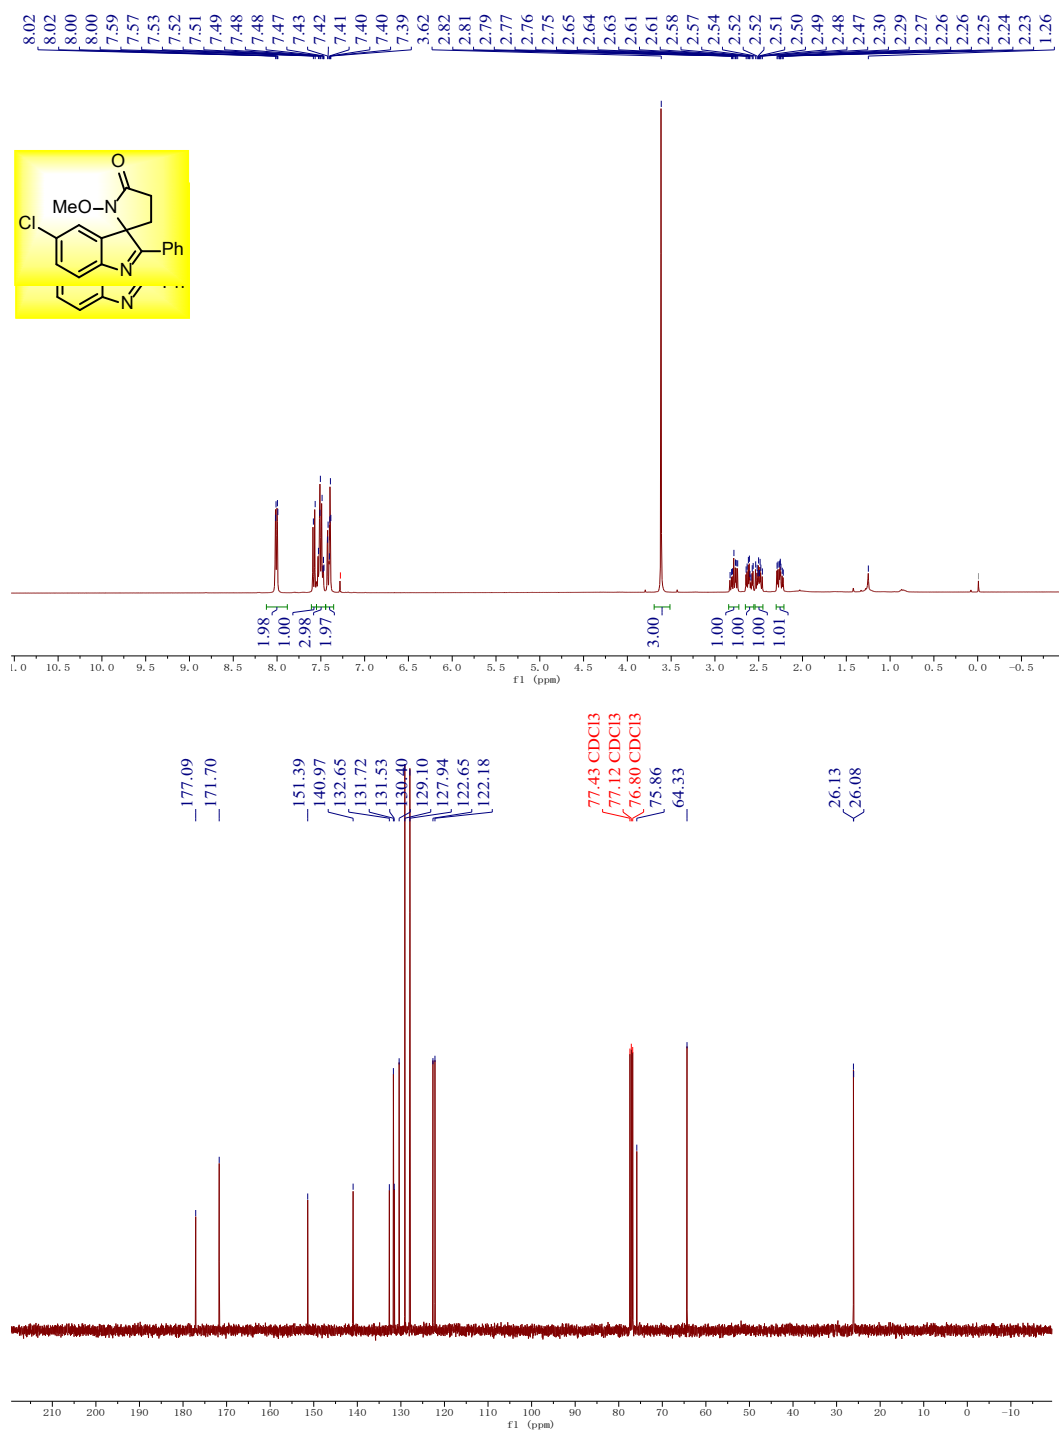

**<sup>1</sup>H NMR and <sup>13</sup>C NMR spectra of 4ae**

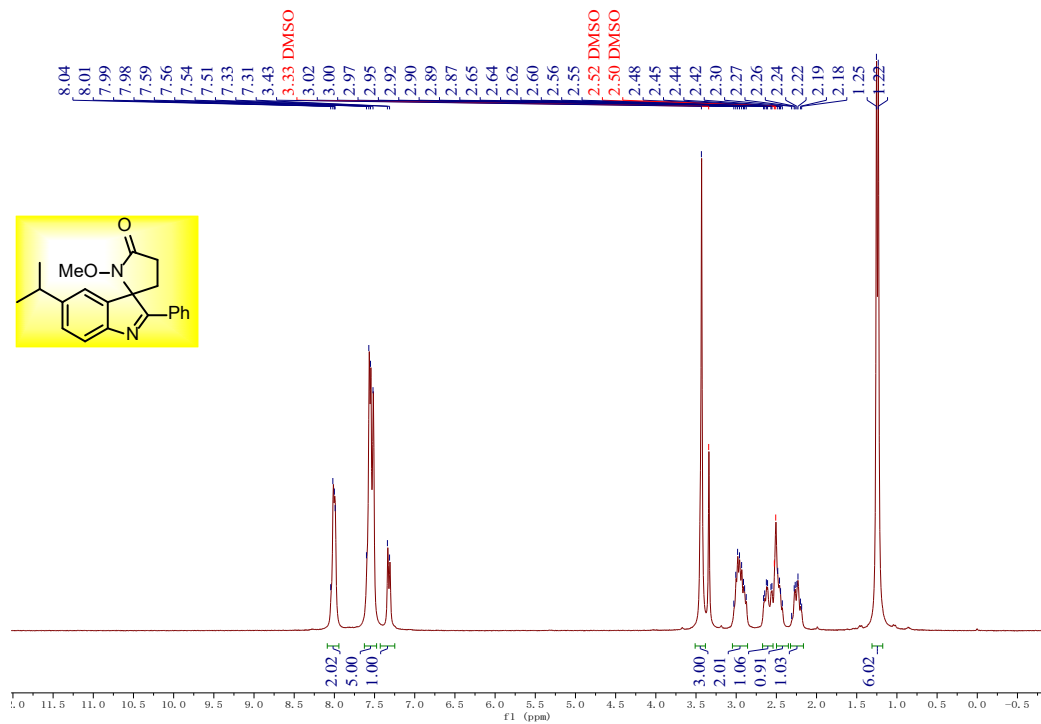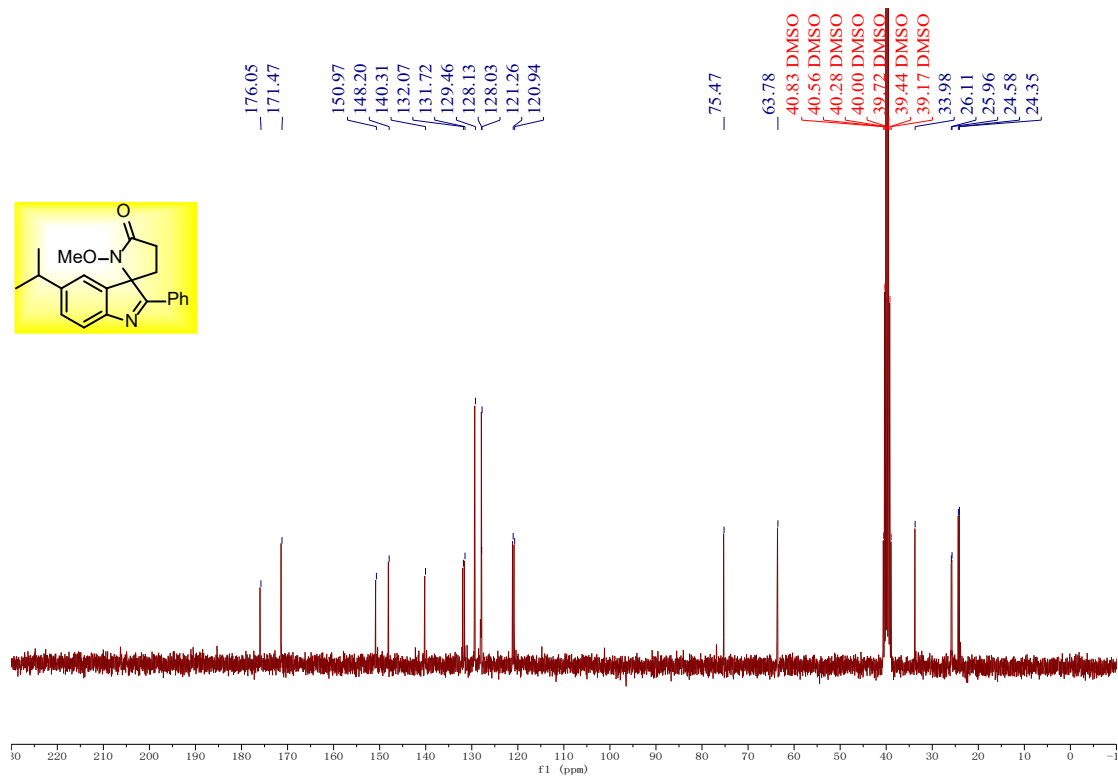

<sup>1</sup>H NMR and <sup>13</sup>C NMR spectra of 4f



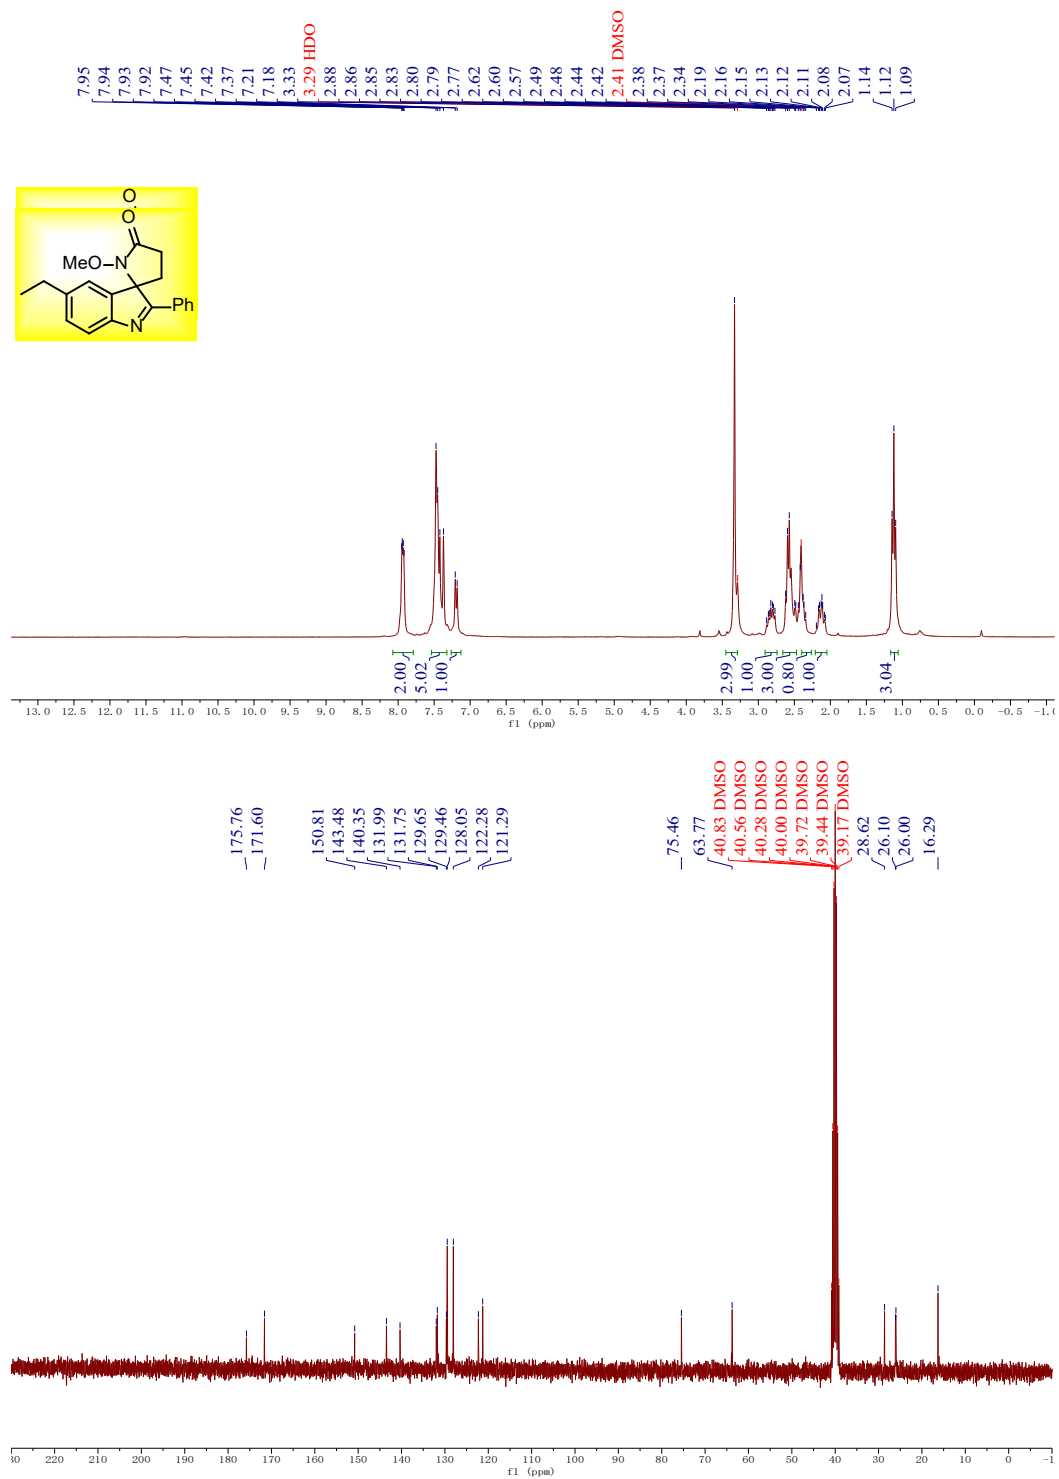

**<sup>1</sup>H NMR and <sup>13</sup>C NMR <sup>19</sup>F NMR spectra of 4ag**

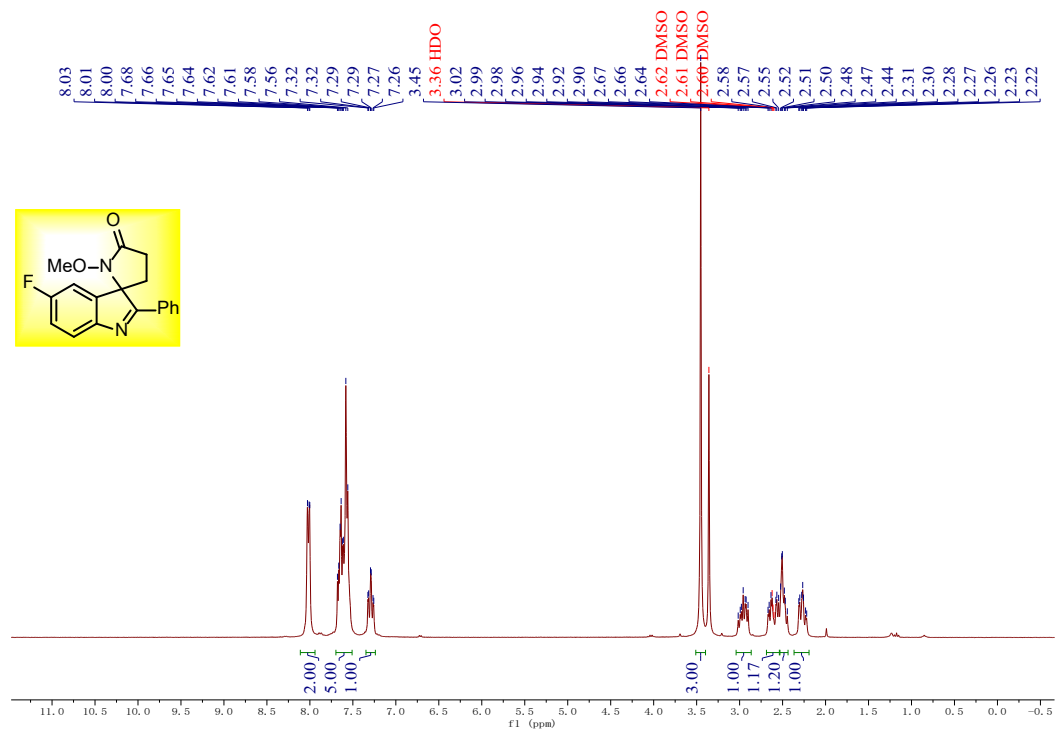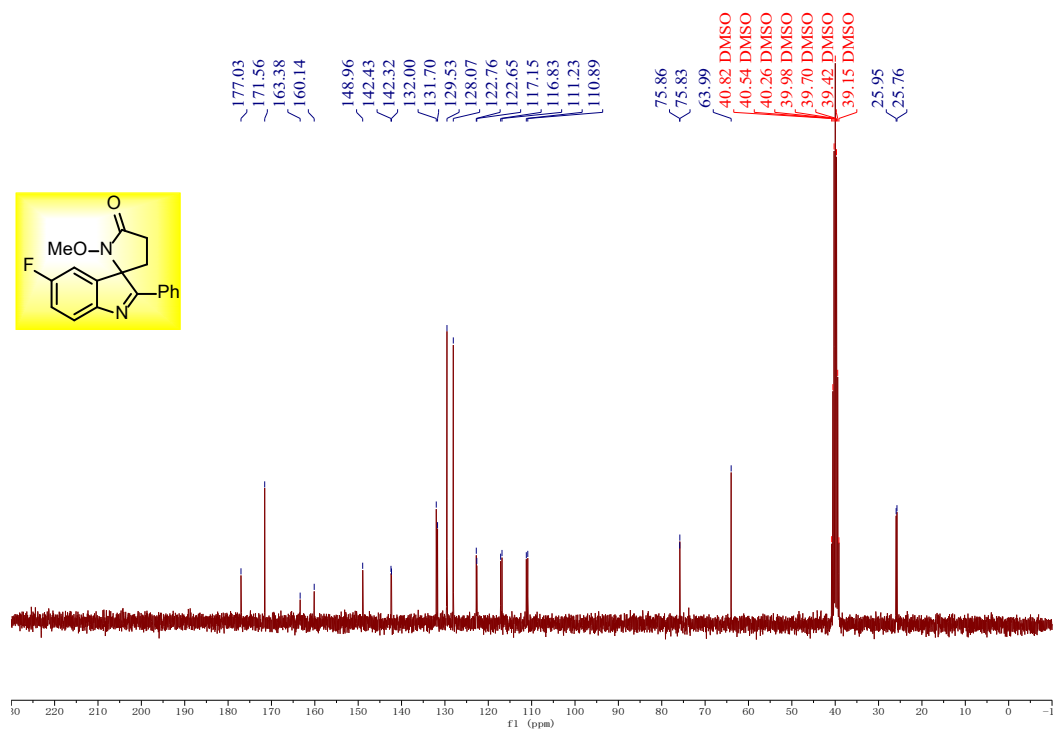

**<sup>1</sup>H NMR and <sup>13</sup>C NMR spectra of 4ah**

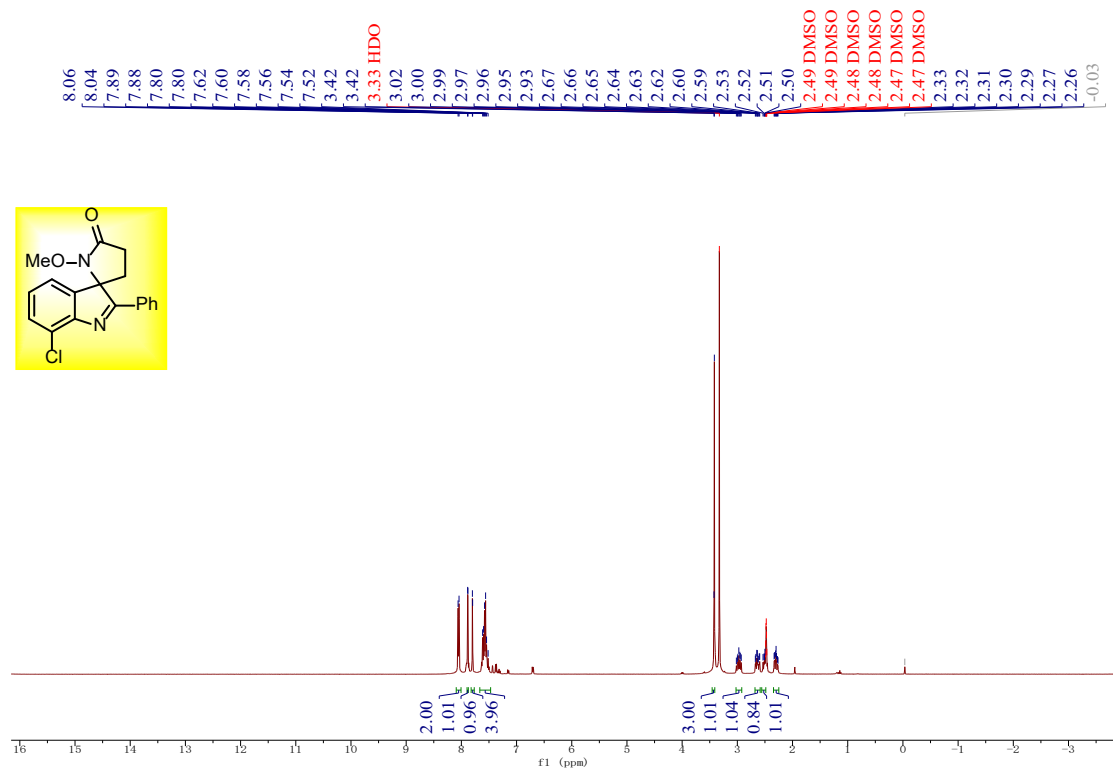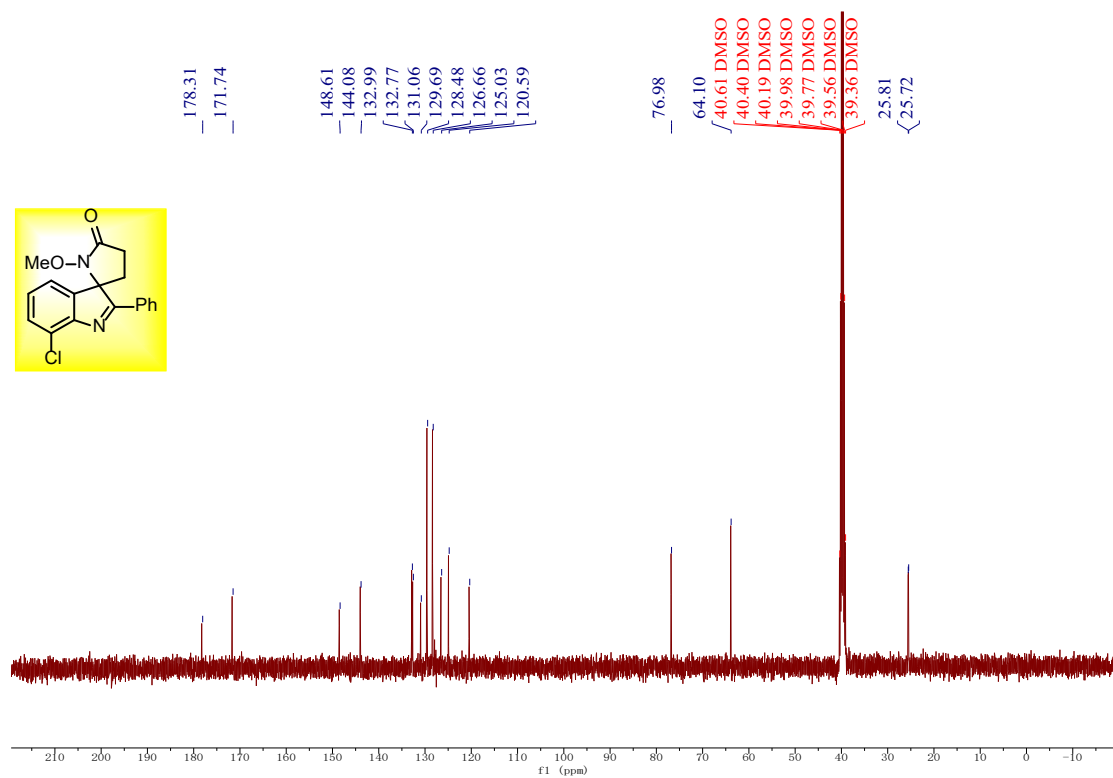

<sup>1</sup>H NMR and <sup>13</sup>C NMR spectra of 4ai

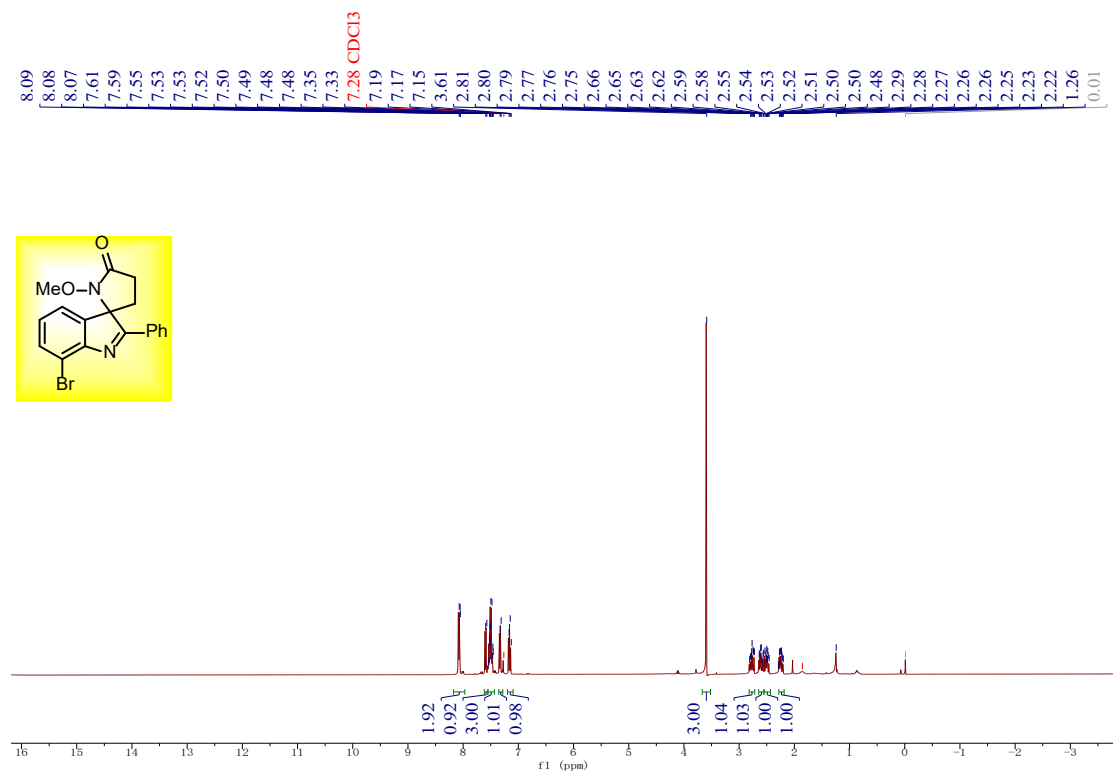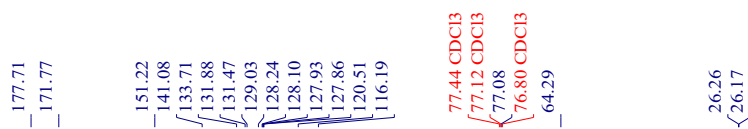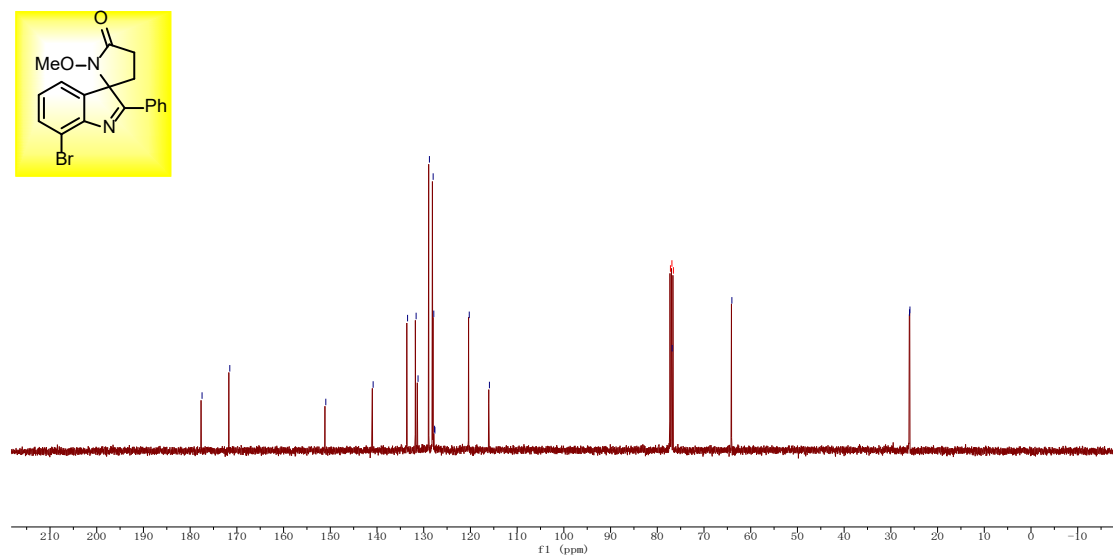

## <sup>1</sup>H NMR and <sup>13</sup>C NMR and of 4aj

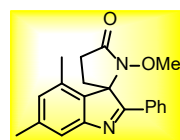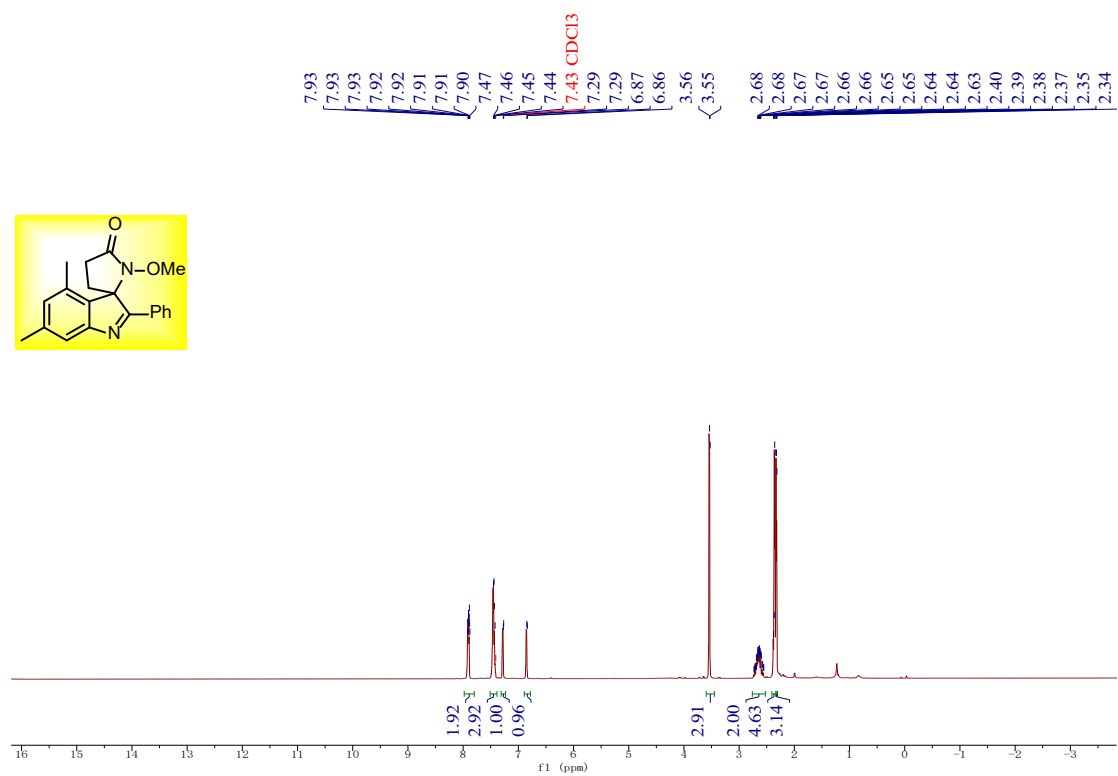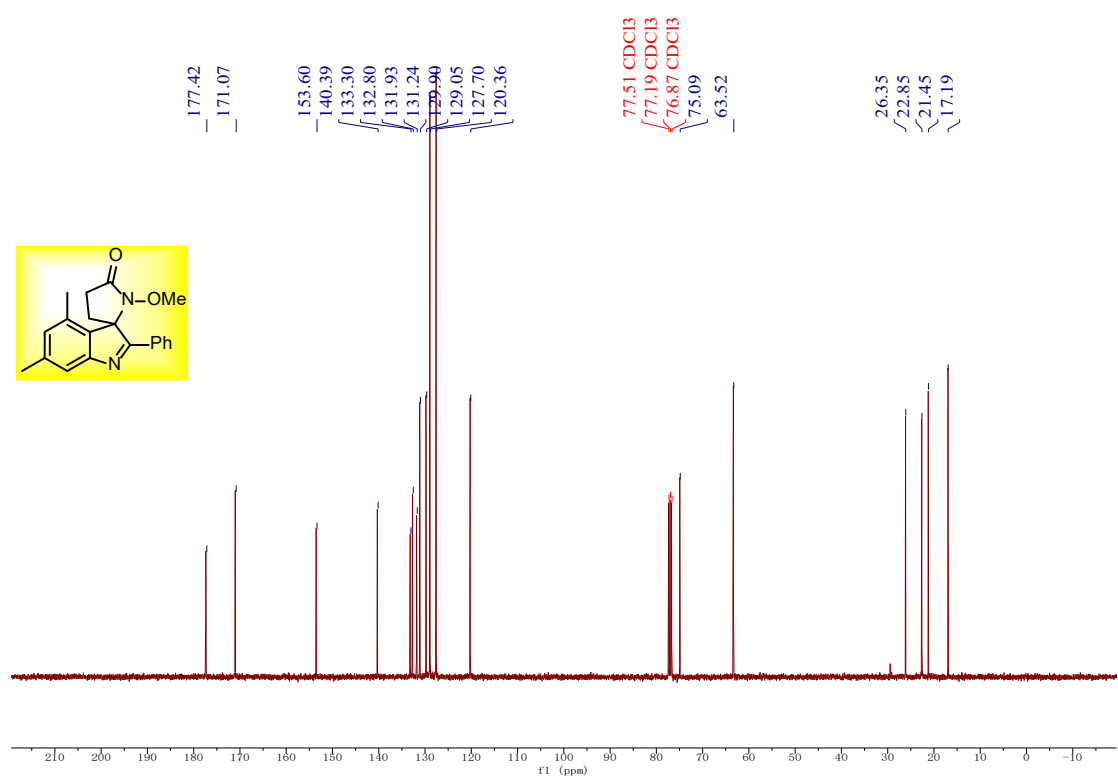

**<sup>1</sup>H NMR <sup>13</sup>C NMR and <sup>19</sup>F NMR spectra of 4ak**

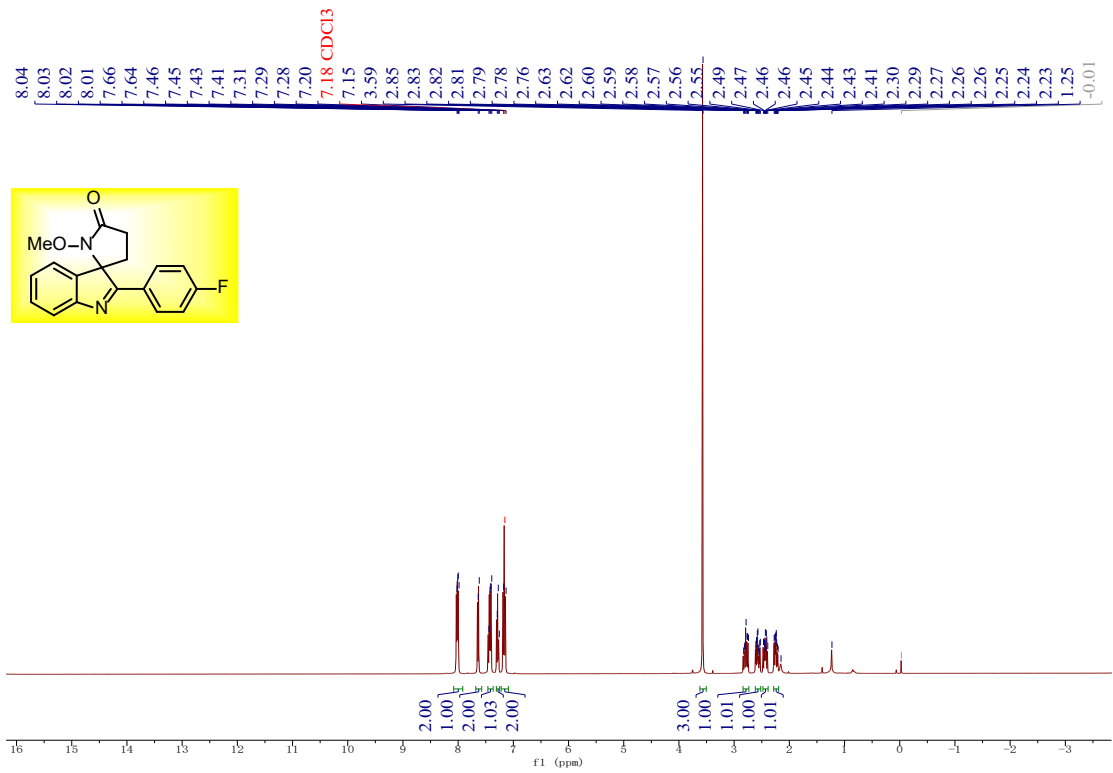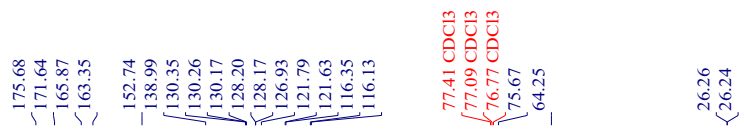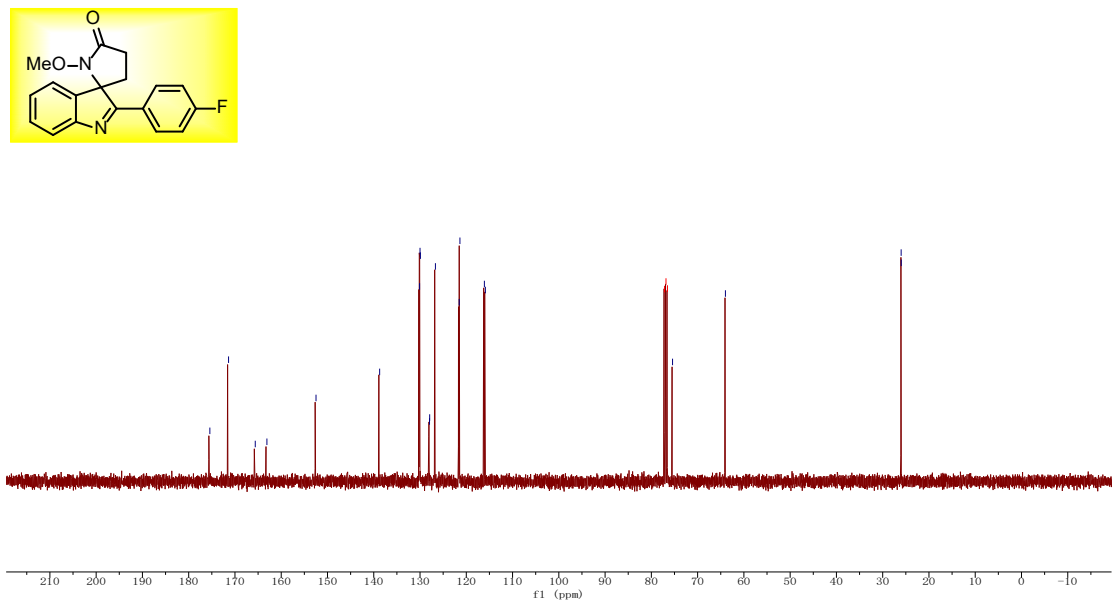

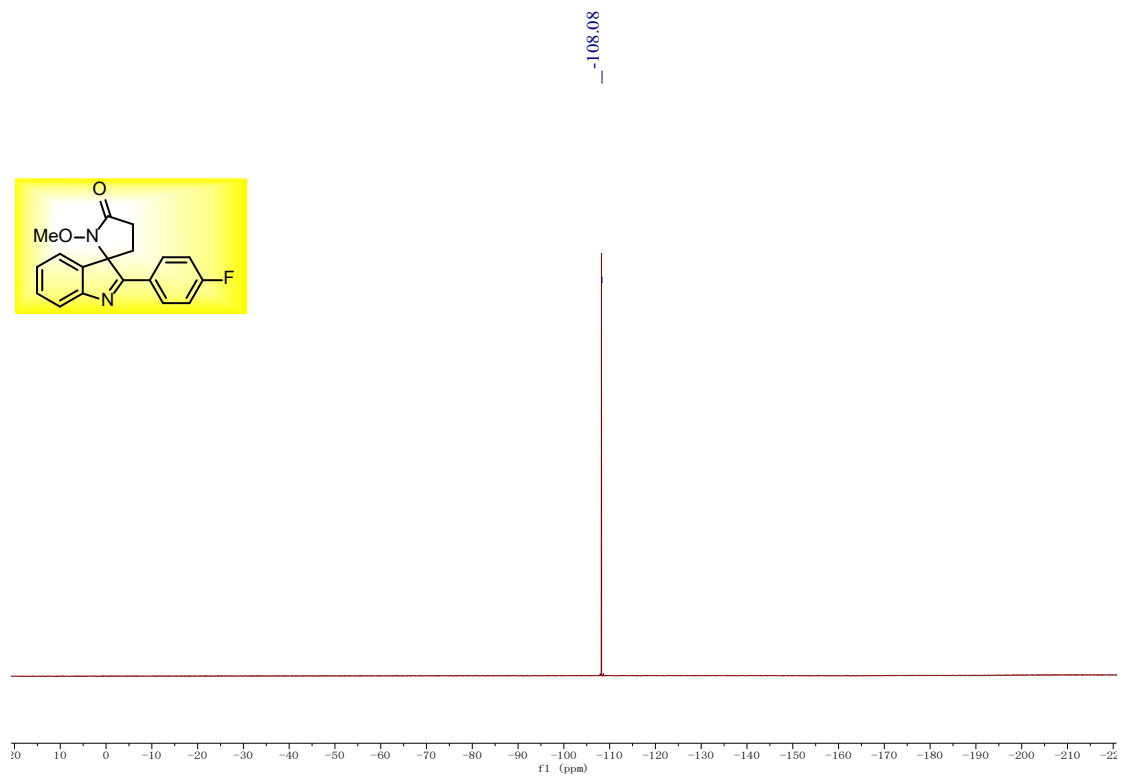

### $^1\text{H}$ NMR and $^{13}\text{C}$ NMR spectra of 4al

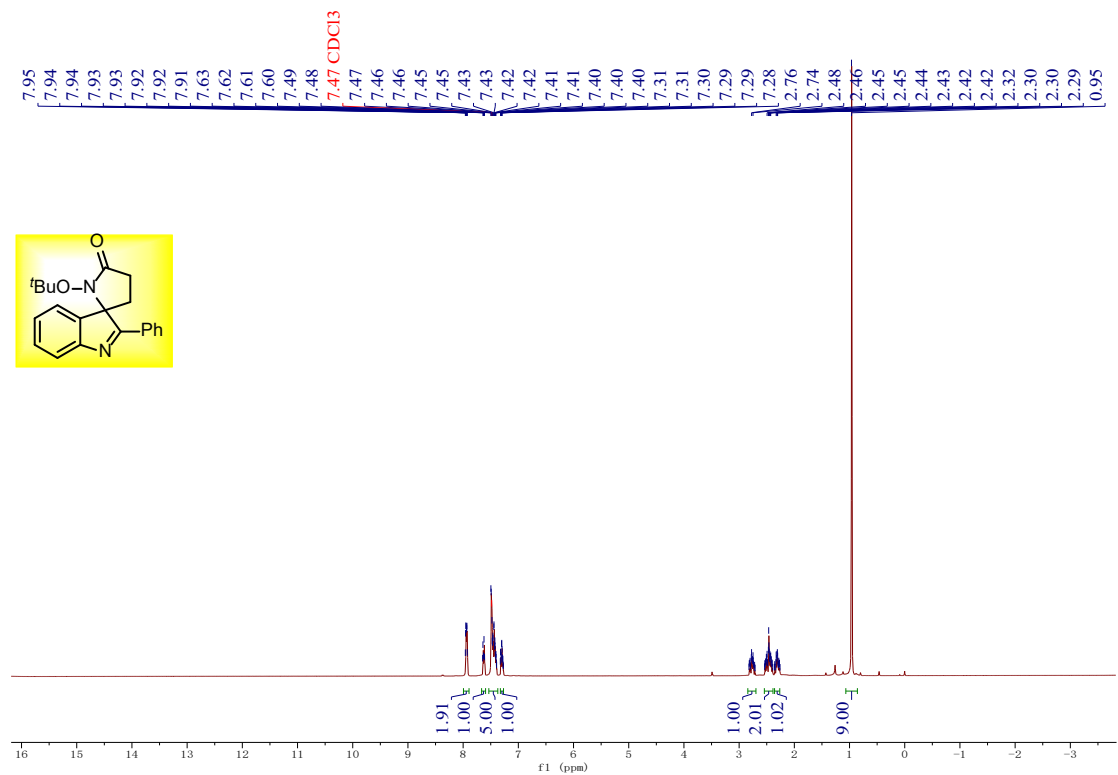

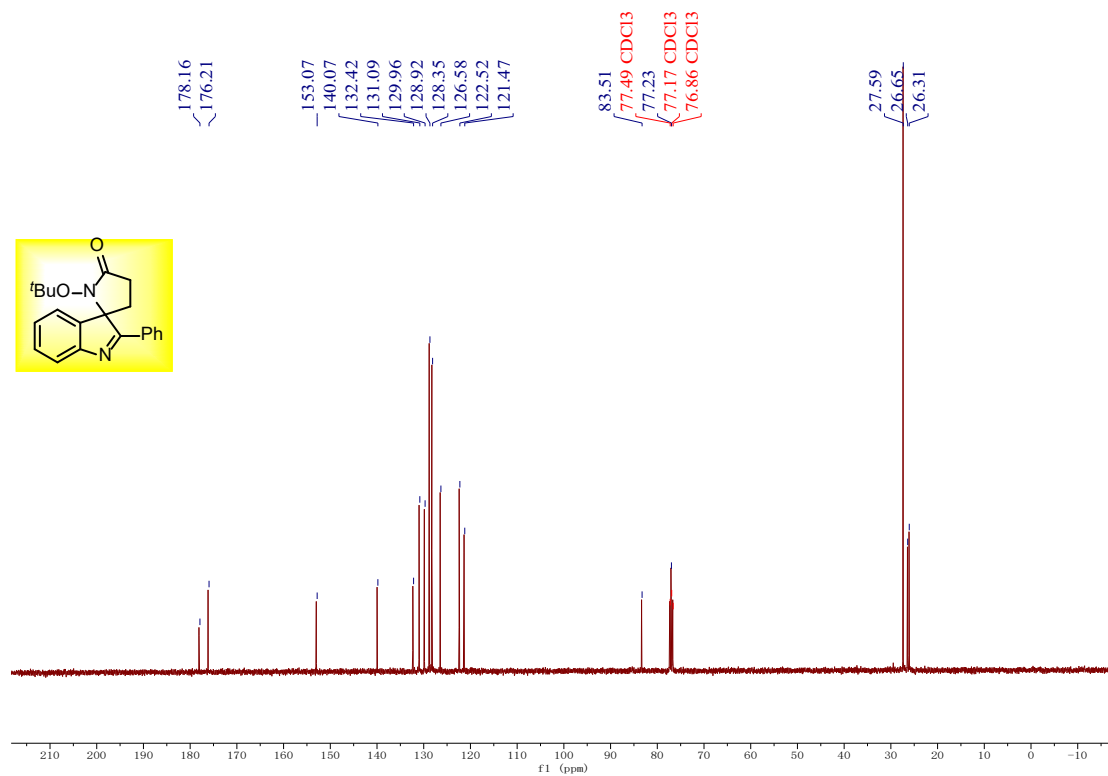

### <sup>1</sup>H NMR and <sup>13</sup>C NMR spectra of 4am

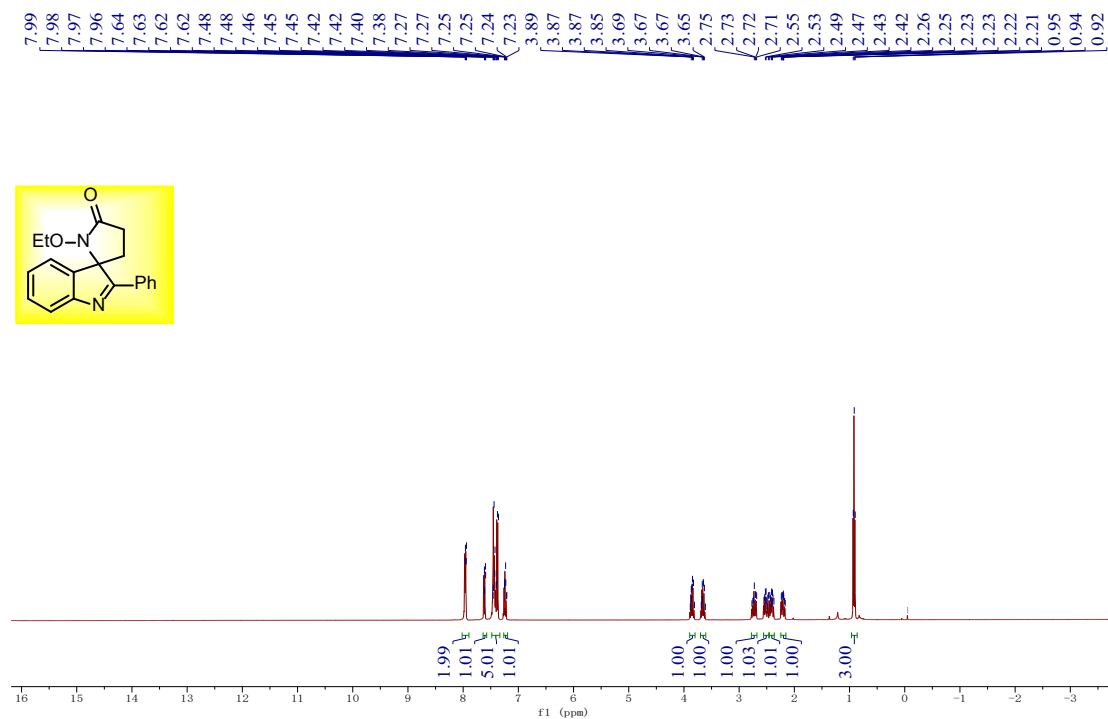



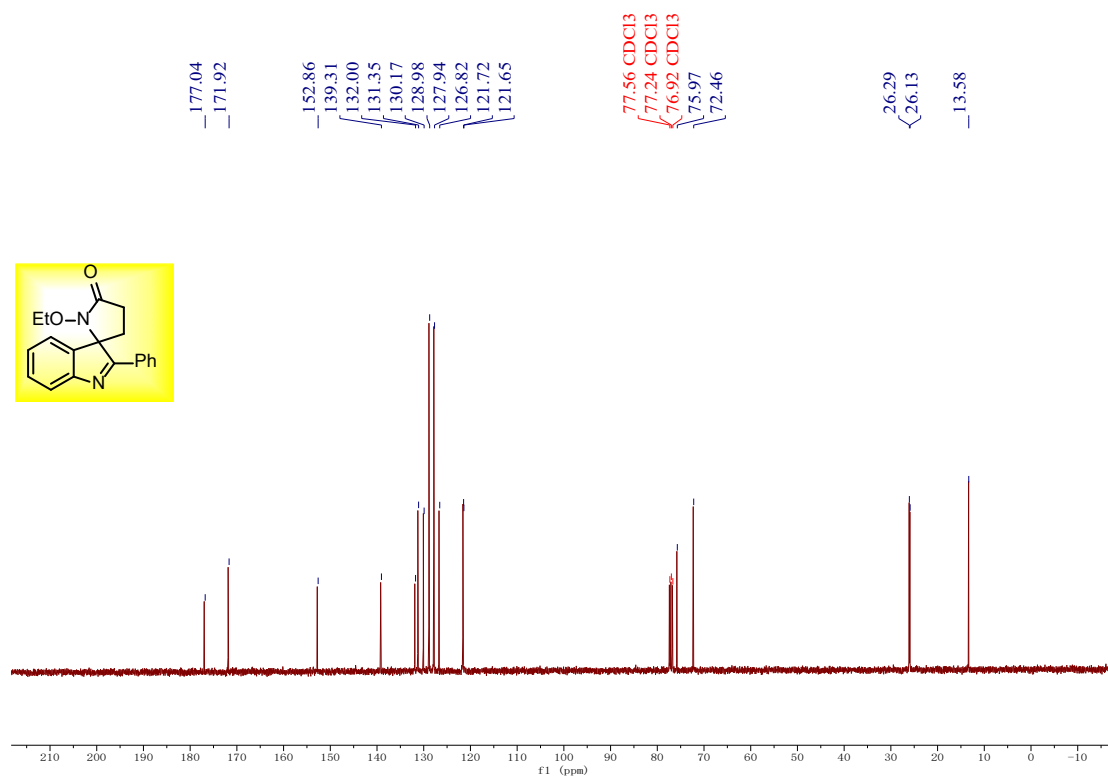

$^1\text{H}$  NMR and  $^{13}\text{C}$  NMR spectra of 5a

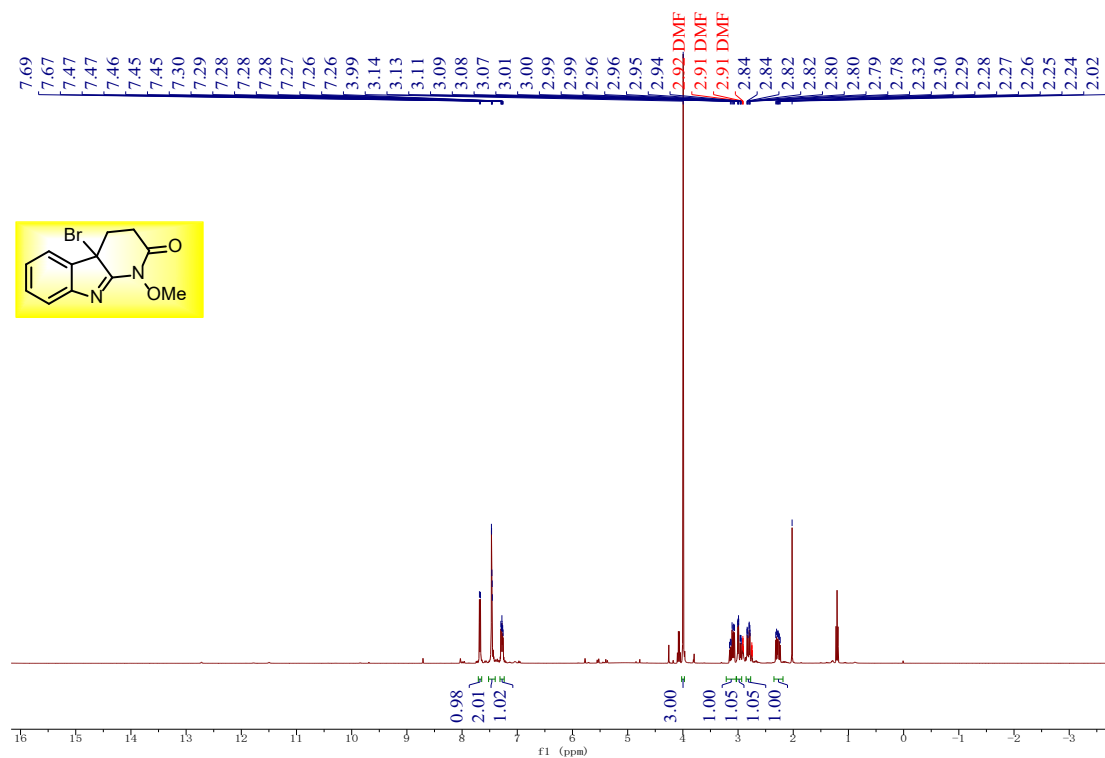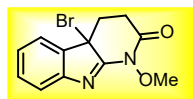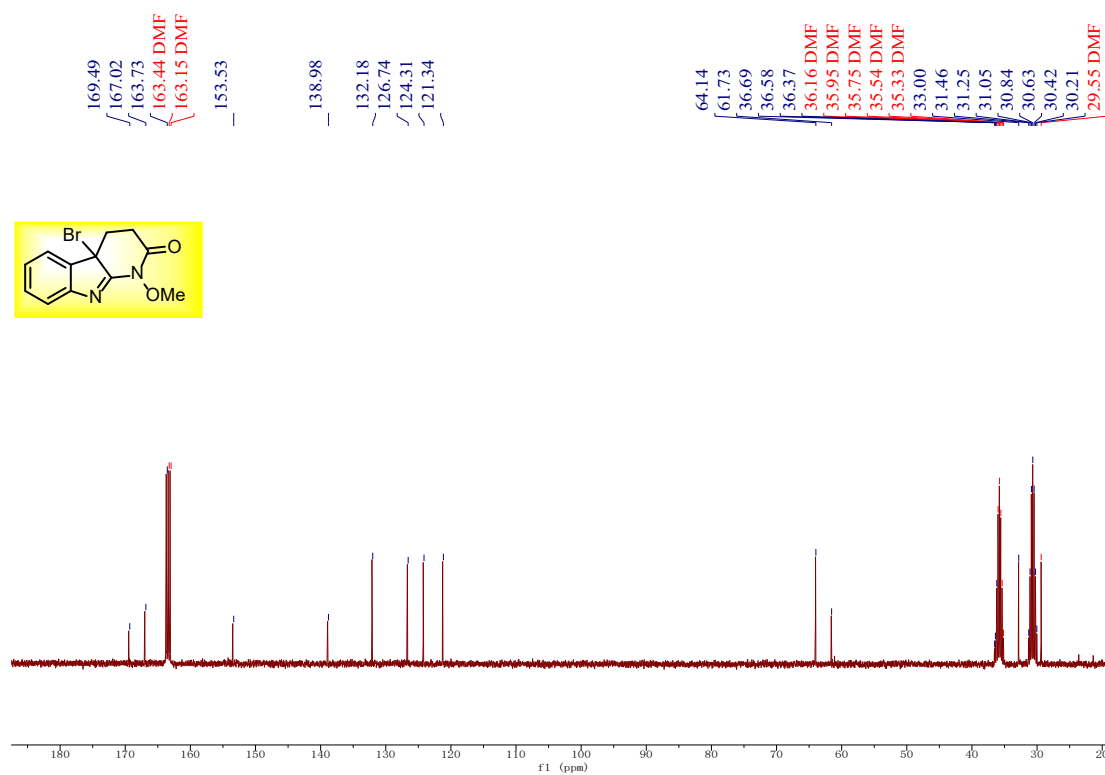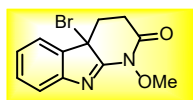

**<sup>1</sup>H NMR and <sup>13</sup>C NMR spectra of 6a**

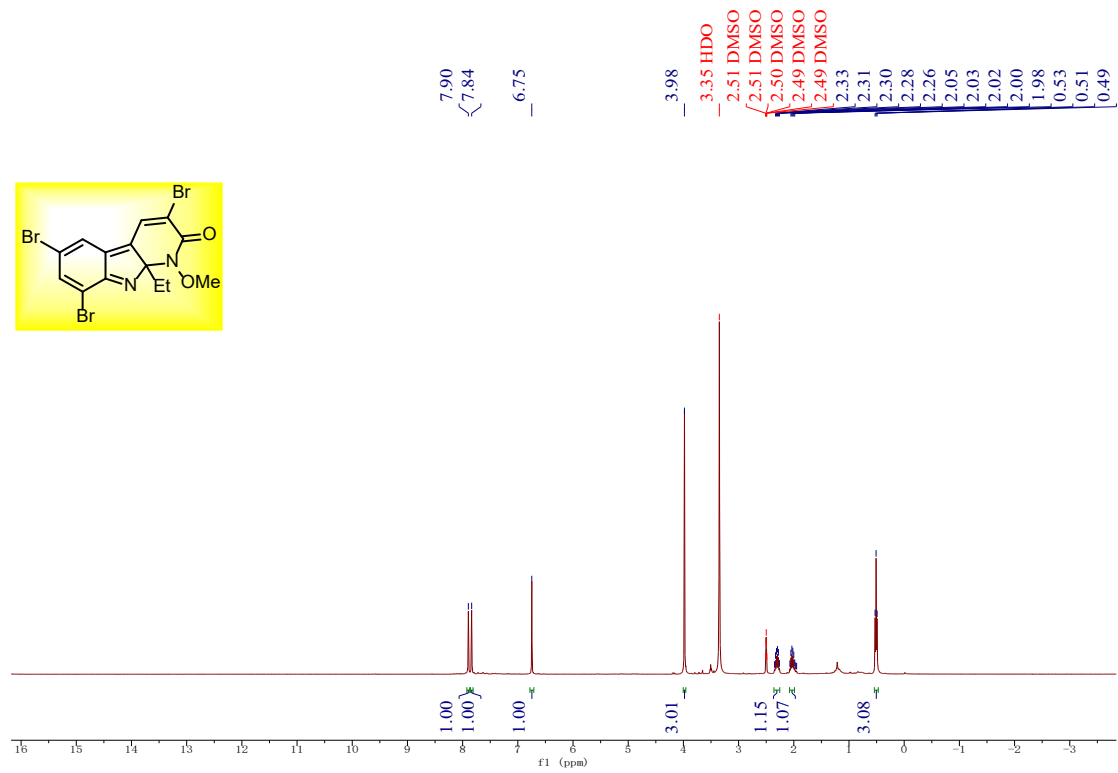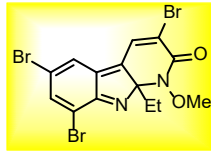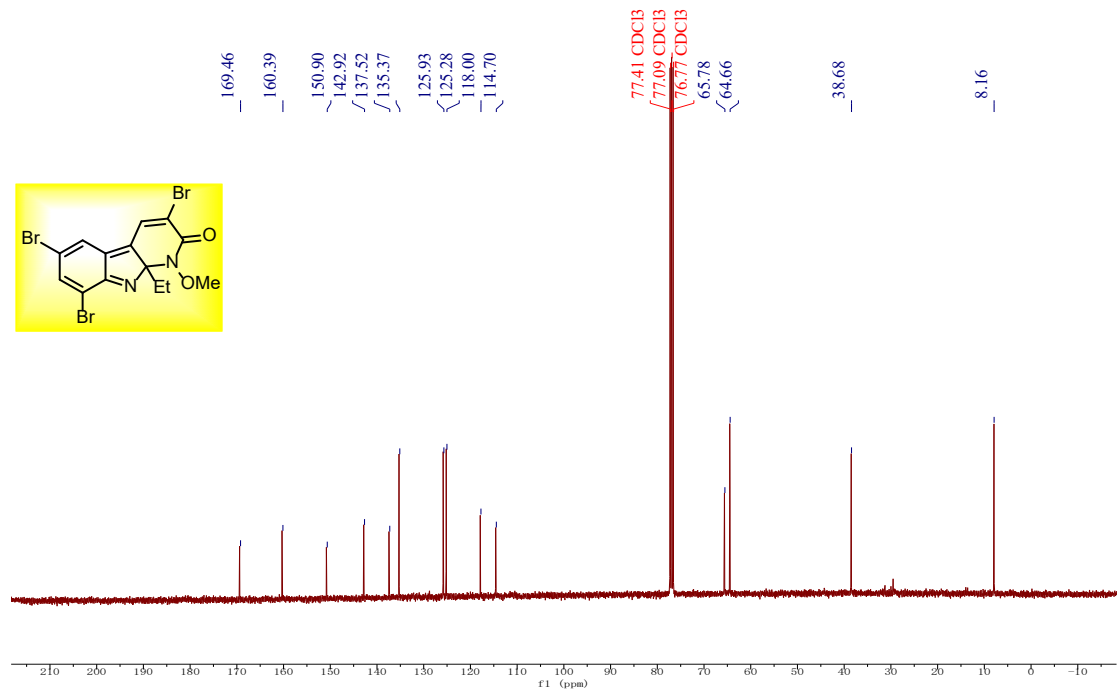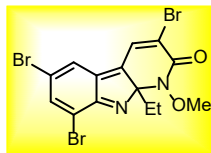

## <sup>1</sup>H NMR and <sup>13</sup>C NMR spectra of 8a

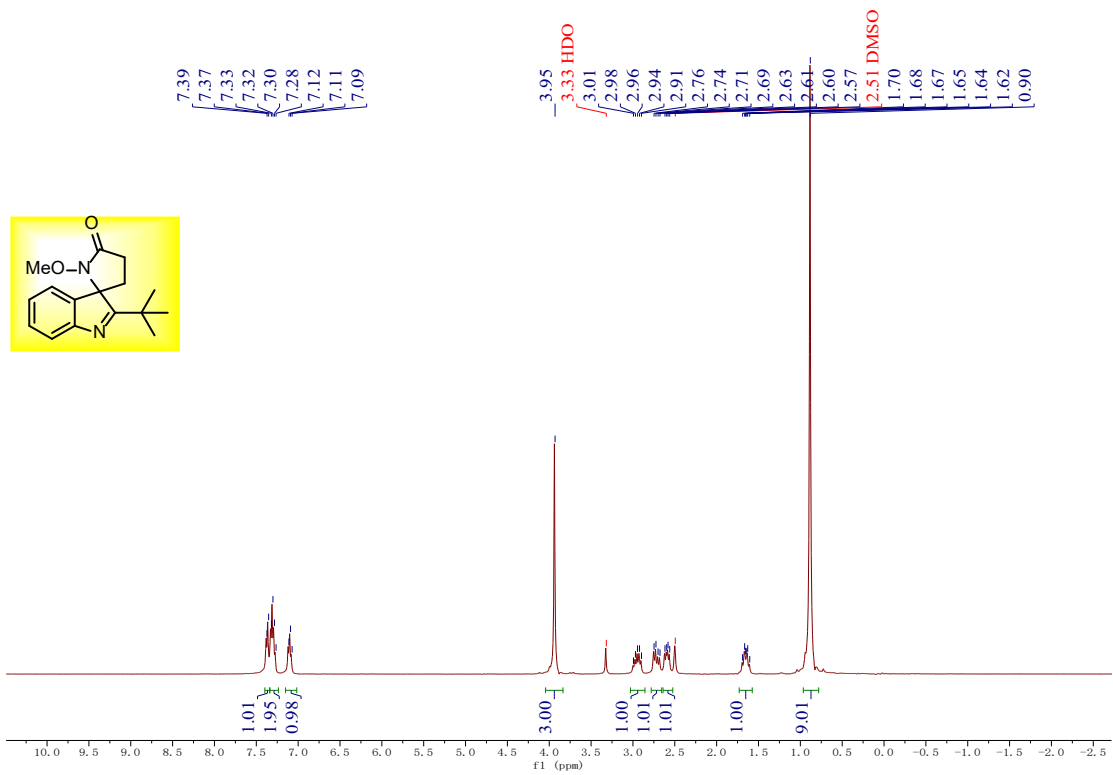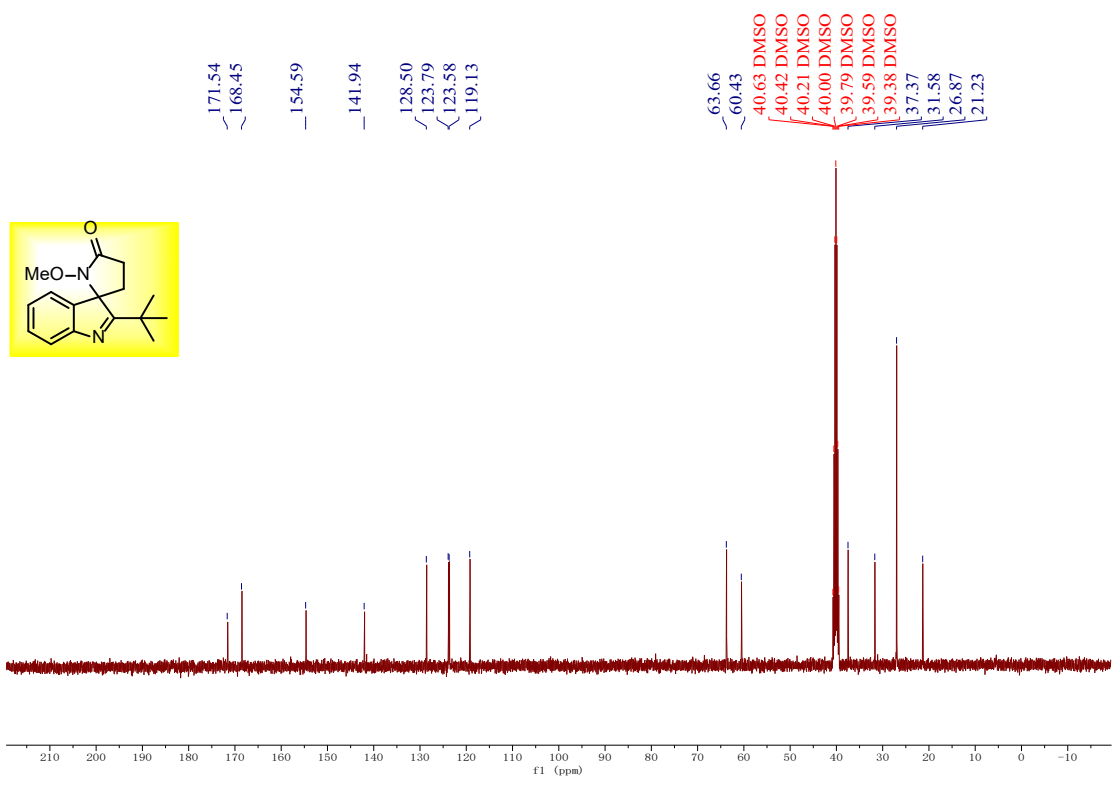

Supplement: d3cc01920a1.pdf [file d3cc01920a1.pdf]
